# Supplementary material for: Human Natural Antibodies Recognizing Glycan Galβ1-3GlcNAc (LeC)
Source: MDPI journal article supplement (doi:10.3390/ijms21186511), 2020-09-05
Supplement: s1 [file s1]

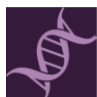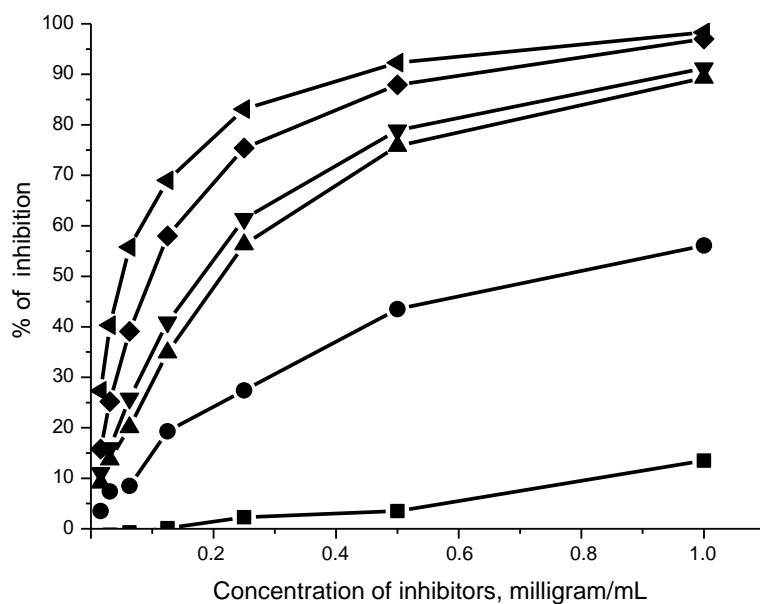

**Figure S1.** Inhibition of human anti-Le<sup>C</sup> Abs (isolated from blood serum) binding to Le<sup>C</sup>-PAA (as a coating antigen in ELISA) with GlcNAcβ1-OSer and other glycosides, top-down: Galβ1-3GlcNAcβ-OCH<sub>2</sub>CH<sub>2</sub>CH<sub>2</sub>NH<sub>2</sub>; Galβ1-3GlcNAcβ-OCH<sub>2</sub>CH<sub>2</sub>NH<sub>2</sub>; GlcNAcβ-OCH<sub>2</sub>CH<sub>2</sub>CH<sub>2</sub>NH<sub>2</sub>; GlcNAcβ-OCH<sub>2</sub>CH<sub>2</sub>NH<sub>2</sub>; GlcNAcβ-O-L-Ser(NAc); GlcNAcβ-O-D-Ser(NAc).

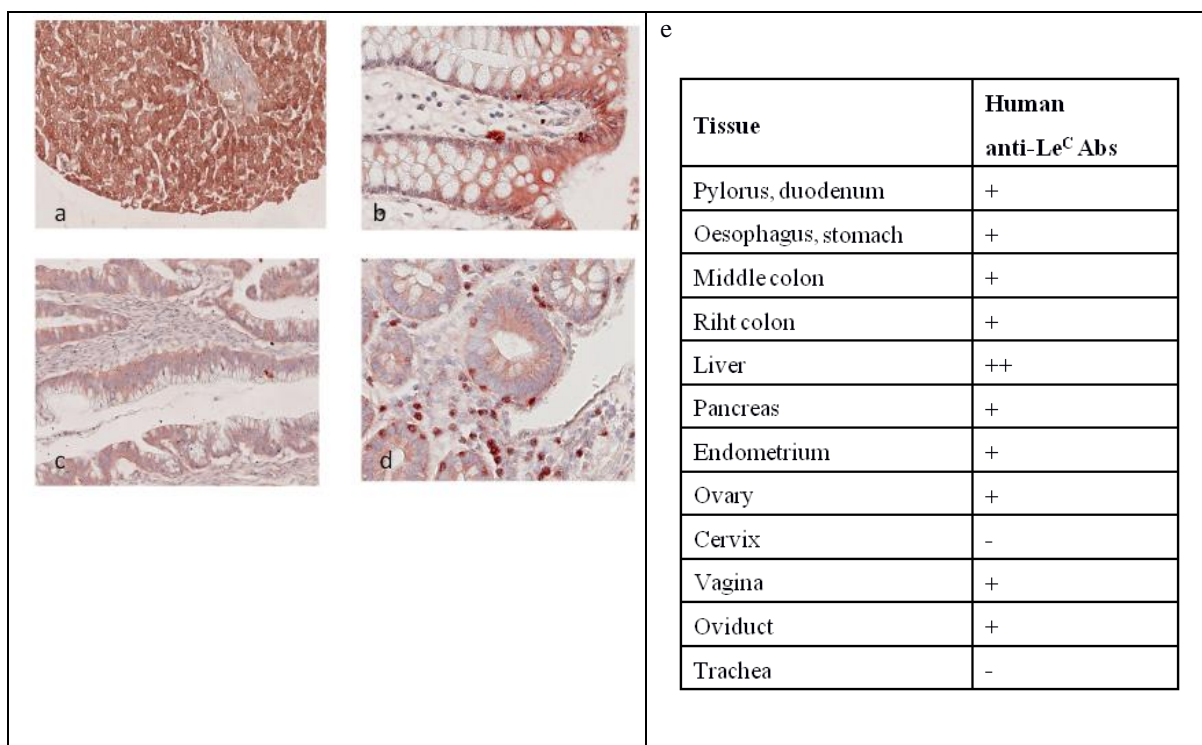

**Figure S2. Binding of human anti-Le<sup>C</sup> Abs to human tissues.** Healthy tissue samples from 10 donors were used to construct a TissueMicroArray that was incubated with biotin-labeled anti-Le<sup>C</sup> Abs (a-e). Binding was detected using peroxidase-labeled avidin and counterstaining performed with hematoxylin. Examples of typical staining results are shown. Liver (a), colon mucosa (b), colon carcinoma (c), normal appearing colonic mucosa adjacent to a tumor (d) and staining levels of healthy tissues (e). Blue color on the developed slides is due to hematoxyline staining of DNA/RNA containing cell structures (nuclei) and pink color is due to the bound antibodies.

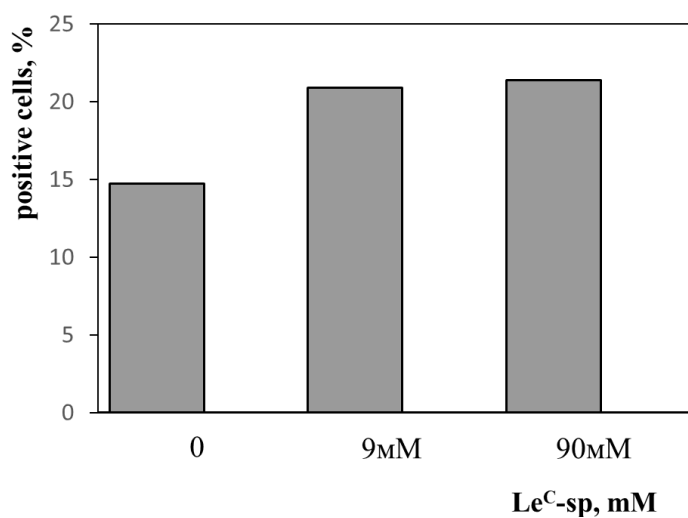

**Figure S3.** Interaction of human antibodies affinity-isolated using Le<sup>C</sup>-Sepharose with ZR 75-1 cells (70% grown density of monolayer) in the presence of free Gal $\beta$ 1-3GlcNAc $\beta$ -sp (Le<sup>C</sup>-sp) disaccharide, sp = OCH<sub>2</sub>CH<sub>2</sub>CH<sub>2</sub>NH<sub>2</sub>. Data of flow cytometry.

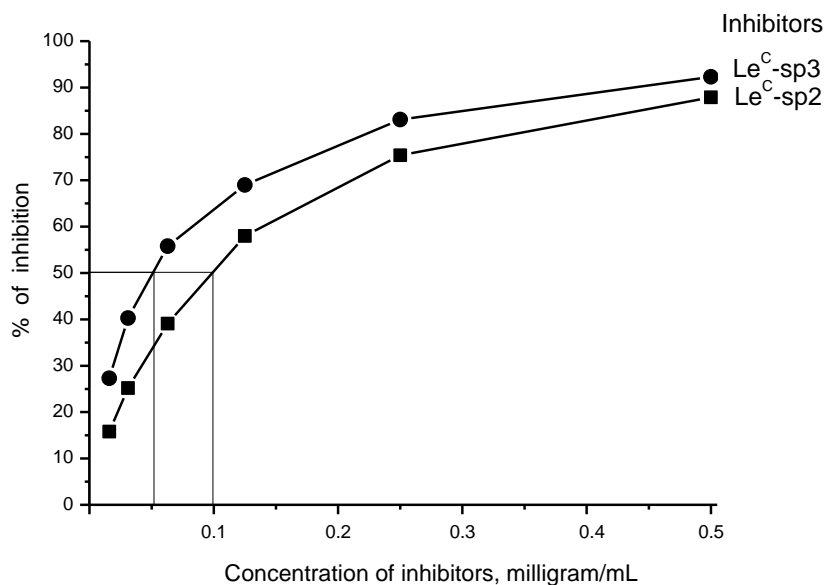

**Figure S4. Evaluation of anti-Le<sup>C</sup> nAbs affinity towards monomeric disaccharide Gal $\beta$ 1-3GlcNAc and estimate of  $K_d$  for anti-Le<sup>C</sup> antibodies using inhibition ELISA.**  $K_d$  was determined as a value corresponding to the molar concentration of free monomeric antigen-inhibitors Le<sup>C</sup>-sp3 (Le<sup>C</sup>-OCH<sub>2</sub>CH<sub>2</sub>CH<sub>2</sub>NH<sub>2</sub>) and Le<sup>C</sup>-sp2 (Le<sup>C</sup>-OCH<sub>2</sub>CH<sub>2</sub>NH<sub>2</sub>) necessary for saturation of half of all antigen-binding sites of antibodies, i.e. for 50% inhibition of binding of antibodies to the immobilized antigen (Le<sup>C</sup>-PAA):  $K_d = [Le^C] = I_{50\%}$  (g/L) = M (g/mol), where  $[Le^C]$  is the molar concentration of the monomeric antigen,  $I_{50\%}$  is mass concentration of free Le<sup>C</sup> disaccharide necessary for 50% inhibition, M is molar mass of the disaccharide. The found values are:  $I_{50\%}$  (Le<sup>C</sup>-sp3) = 51  $\mu$ g/mL,  $K_d = 1.4 \times 10^{-4}$  M.

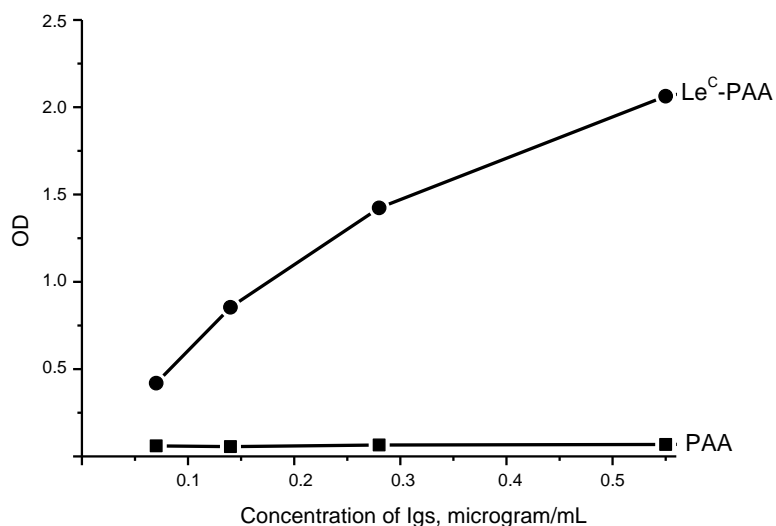

**Figure S5. Affinity of the antibodies towards polymeric antigen, Le<sup>C</sup>-PAA, estimated using ELISA.** Immunological plates (NUNC MaxiSorb) were coated with Le<sup>C</sup>-PAA. The affinity constant was evaluated as an amount of Abs equal to the concentration of Abs giving the signal intensity (OD) = 1 in the linear region of the *signal intensity vs. antibody quantity* plot, i.e.  $K_d \sim [Abs]$ . The concentration of anti-Le<sup>C</sup> antibodies (at OD = 1) was 0.2  $\mu\text{g/mL}$ , i.e.  $K_d$  is equal to  $8.6 \times 10^{-10}$  M.
