# Supplementary material for: Human Natural Antibodies Recognizing Glycan Galβ1-3GlcNAc (LeC)
Source: Int J Mol Sci. 2020 Sep 5;21(18):6511. doi: 10.3390/ijms21186511 (PMC7554730; doi:10.3390/ijms21186511)
Supplement: Supplementary file 1 [file ijms-21-06511-s001.zip › ijms-905383-Supplementary Tables.xlsx]

## Sheet: Suppl Table S1
	Supplementary Table S1.
	Profiling of mouse antibodies isolated using affinity adsorbent LeC-Sepharose, printed glycan array data
Slide:	slide H Schott Nexterion
Slide #	10071612
Amount of ligands: 432 aminospacered glycans
Printing	sciFLEXARRAYER S5 non-contact piezo-arrayer (Scienion, Berlin, Germany) with installed quality control system (pre- and post-drop controls). The drop volume was approximately 0.9 nL
Quality control: staining of 4% of slides in one batch by the standart serum as well as the plant lectin mix. The correlation coefficient between slides within one batch was higher than 0.9
			IgG+IgM+IgA
Nr (CarbLab)	Structure	Short Name	Median	25%-quartile	75%-quartile
542	Galb1-3GlcNAcb1-3Galb1-4(Fuca1-3)GlcNAcb1-6(Galb1-3GlcNAcb1-3)Galb1-4Glcb-sp4	MF(1-3)iLNO	44104	3381	3380
403	Galb1-3GlcNAcb1-3Galb1-4GlcNAcb-sp2	LeC3'LN	36480	183	184
376	Galb1-3GlcNAcb1-3Galb1-4Glcb-sp4	LNT	35426	687	686
379	Galb1-3GlcNAcb1-3Galb1-4GlcNAcb-sp3	LeC3'LN	31806	251	251
401	Galb1-3GlcNAcb1-3Galb1-3GlcNAcb-sp3	LeC3'LeC	24205	115	115
377	Galb1-3GlcNAcb1-3Galb1-3GlcNAcb-sp2	LeCb3'LeC	24062	969	968
538	Galb1-4(Fuca1-3)GlcNAcb1-6(Galb1-3GlcNAcb1-3)Galb1-4Glcb-sp4	MFLNH III	23472	1532	1533
399	Galb1-3GlcNAca1-3Galb1-3GlcNAcb-sp2	LeCa3'LeC-C2	16890	213	212
529	Neu5Aca2-6(Galb1-3)GlcNAcb1-3Galb1-4Glcb-sp4	LSTb	16878	382	383
279	Galβ1-3GlcNAcα1-3GalNAcα-sp3	LeCa3Tn	10884	1014	1013
378	Galb1-3GlcNAca1-3Galb1-4GlcNAcb-sp3	LeCa3'LN	10706	3898	3898
145	Galb1-3(6-O-Su)GlcNAcb-sp3	LeC6Su	7010	397	396
85	Galb1-3GlcNAcb-sp3	LeC	4643	467	467
144	Galb1-3(6-O-Su)GlcNAcb-sp2	LeC6Su-C2	3594	34	35
397	Galb1-3GlcN(Fm)b1-3Galb1-4GlcNAcb-sp3	LeC(Fm)b3'LN	3518	310	310
381	Galb1-3GlcNAcb1-6Galb1-4GlcNAcb-sp2	LeC6'LN	3198	182	182
129	Galb1-3(6-O-Bn)GlcNAcb-sp3	6BnLeC	2866	39	39
215	Fuca1-2Galb1-3GlcNAcb-sp3	LeD	2768	97	98
479	Fuca1-2Galb1-3GlcNAcb1-3Galb1-4Glcb-sp4	Htype1Lac	2466	70	69
380	Galb1-3GlcNAca1-6Galb1-4GlcNAcb-sp2	LeCa6'LN	2436	121	122
86	Galb1-3GlcNAcb-sp2	LeC-C2	2308	120	119
539	Galb1-4GlcNAcb1-6(Fuca1-2Galb1-3GlcNAcb1-3)Galb1-4Glcb-sp4	MFLNH I	1601	101	101
331	Neu5Gca2-3Galb1-3GlcNAcb-sp3	3'SiaLeC(Gc)	1332	319	318
299	Neu5Aca2-3Galb1-3GlcNAcb-sp3	3'SiaLeC	1328	5	4
398	Galb1-3GlcN(Fm)b1-3Galb1-3GlcNAcb-sp3	LeC(Fm)3'LeC	1312	226	226
541	Galb1-4(Fuca1-3)GlcNAcb1-6(Fuca1-2Galb1-3GlcNAcb1-3)Galb1-4Glcb-sp4	DFLNH (a)	1296	16	16
154	3-O-Su-Galb1-3GlcNAcb-sp3	LeC3'Su	1210	39	39
307	KDNa2-3Galb1-3GlcNAcb-sp2	KDN3'LeC	1024	77	78
261	Galb1-4(Fucb1-3)GlcNAcb-sp3	bLeX	767	57	57
55	3-O-Su-GlcNAcb-sp3	GN3Su	277	37	37
267	GlcNAcb1-3Galb1-3GlcNAcb-sp3	GlcNAc3'Lec	261	39	39
130	(6-O-Bn-Galb1)-3GlcNAcb-sp3	6'BnLeC	230	14	14
74	Fucb1-3GlcNAcb-sp3	Fb3GN	218	4	4
536	Neu5Aa2-3Galb1-3GlcNAcb1-3Galb1-4Glcb-sp4	LSTa	198	9	10
131	(6-O-Bn-Galb1)-3(6-O-Bn)GlcNAcb-sp3	Bn2LeC	191	2	2
88	Galb1-3GalNAcb-sp3	Tbb	183	13	13
547	Neu5Aa2-3Galb1-3GlcNAcb1-3Galb1-4Glca-sp4	LSTaa	179	19	19
161	6-O-Su-Galb1-3GlcNAcb-sp3	LeC6'Su	148	4	4
364	Gala1-3Galb1-4(Fuca1-3)GlcNAcb-sp3	aGalLeX	132	0	0
160	6-O-Su-Galb1-3GlcNAcb-sp2	LeC6'Su-C2	120	13	14
164	GlcAb1-3GlcNAcb-sp3	GUb3GN	120	1	2
259	Galb1-4(Galb1-3)GlcNAcb-sp3	(Ab)2-3,4GN	120	5	6
80	Gala1-3GlcNAcb-sp3	Aa3GN	116	7	8
262	Galb1-3GalNAcb1-3Galβ-sp4	Tbb-A	97	6	6
501	Galb1-3GalNAcb1-3Gala1-4Galb1-4Glcb-sp4	Gb5	86	24	23
208	Gal1-3GlcNAc-sp4	LeC-Gly	74	18	18
233	Galb1-3(Fuca1-4)GlcNAcb-sp3	LeA	70	4	4
13	GlcNAcb-sp8	GN-PEG	66	6	6
382	Galb1-3GalNAcb1-4Galb1-4Glcb-sp3	aGM1	66	6	6
125	6-Bn-Galb1-4GlcNAcb-sp2	6'Bn-LN	62	0	0
216	Fuca1-2Galb1-4GlcNAcb-sp3	Htype2	60	1	1
480	Fuca1-2Galb1-3GlcNAcb1-3Galb1-4GlcNAcb-sp2	Htype1LN	58	6	6
506	Arafb1-2Arafa1-5(Arafb1-2Arafa1-3)Arafa1-5Arafa-O(CH2)2NHCOCH2(OCH2CH2)6NH2	Araf6	58	2	2
140	Gala1-3GalNAc(fur)b-sp3	Tab(f)	54	0	0
441	Neu5Ac2-6(Fuc1-2)Gal1-4GlcNAc-sp3	Sia6'Htype2	54	0	0
481	Gala1-3Galb1-4GlcNAcb1-3Galb1-4Glcb-sp4	Galili5	54	7	8
800	GlcNAca1-4GlcNAcb-sp3	GNa4GN	54	4	4
813	Galβ1-3GalNGcα-sp3	TFGc	50	5	6
10	GlcNAcb-sp3	GN	46	7	8
323	Neu5Aca2-6Galb1-3GlcNAcβ-sp3	6'SiaLeC	46	0	0
20	Rhaa-sp3	aR	44	2	3
11	GlcNAcb-sp2	GN-C2	42	3	4
252	GlcNAcb1-4GlcNAcb1-4GlcNAcb-sp4	Ch3	40	2	3
72	Fuca1-3GlcNAcb-sp3	Fa3GN	39	0	0
101	GalNAca1-3GalNAcb-sp3	Fs-2	39	0	0
255	GlcNAcb1-6(GlcNAcb1-3)GalNAca-sp3	core4	39	0	0
179	6-O-Su-Galb1-3(6-O-Su)GlcNAcb-sp2	LeC6,6'Su2	38	3	4
406	GalNAca1-3(Fuca1-2)Gala1-3GalNAcb-sp3	Atria3AN	38	3	4
123	Manβ1-4GlcNAcb-sp4	Mb4GN	37	1	1
56	Gala-sp7	aA-Ph	36	4	5
117	GlcNAcb1-4GlcNAcb-sp4	Ch2-Gly	36	4	5
1	Fuca-sp3	aF	35	2	2
87	Galb1-3Galb-sp3	Ab3A	35	2	2
183	4,6-O-Su2-Galb1-4GlcNAcb-sp2	LN4'6'Su2-C2	35	2	2
503	(GlcNAcb1-4)6-sp4	Ch6	35	2	2
21	Galb-sp4	bA-Gly	31	0	0
53	Neu5Gcb-sp3	bSia5Gc	31	4	4
73	Fuca1-4GlcNAcb-sp3	Le	31	4	4
113	GlcNAcb1-3GalNAca-sp3	core3	31	0	0
126	6-Bn-Gala1-4(6-Bn)GlcNAcb-sp3	Bn2-aLN	31	0	0
135	Galb1-4Glcb-sp4-Asn	Lac-Asn	31	0	0
142	GlcNAca1-3GalNAcb-sp3	GNa3AN	31	0	0
171	Neu5Aca2-3GalNAca-sp3	3-SiaTn	31	4	4
247	GlcNAcb1-3Galb1-3GalNAca-sp3	GN3'TF	31	0	0
249	GlcNAcb1-3Galb1-4GlcNAcb-sp2	GN3'LN-C2	31	0	0
268	GlсNAcb1-4(Fuca1-6)GlcNAcb-sp3	Fa6Ch2	31	0	0
324	Neu5Aca2-6Galb1-3(6-O-Su)GlcNAcβ-sp3	6'SiaLeC6Su	31	0	0
329	Neu5Aca2-3Galb1-4Glcb-sp4-Trp	3'SL-Trp	31	0	0
343	Neu5Gca2-3Galb1-4Glcb-sp2	3'SL(Gc)	31	4	4
437	GalNAca1-3(Fuca1-2)Galb1-3GalNAcb-sp3	A(type 4)	31	0	0
276	GlcNAcb1-4Galb1-4GlcNAcb-sp3	GN4'LN-C3	30	7	8
116	GlcNAcb1-4GlcNAcb-sp3	Ch2	29	1	1
175	Neu5Gcb2-6GalNAca-sp3	bNeu5GcTn	29	7	7
248	GlcNAcb1-3Galb1-4Glcb-sp2	GN3'Lac	29	5	5
3	Galb-sp3	bA	27	2	2
5	GalNAca-sp3	Tn	27	2	2
17	Mana-sp4	aM-Gly	27	2	2
28	Xylb-sp4	bXyl	27	2	2
29	Fucb-sp4	bF	27	2	2
44	GlcAa-sp3	aGU	27	2	2
48	Neu5Aca-sp3	Sia	27	2	2
60	6-O-Su-Galb-sp3	bA6Su	27	2	2
83	Gala1-6Glcb-sp4	Aa6G	27	2	2
100	Galb1-6Galb-sp4	Ab6A	27	6	6
104	GalNAcb1-3Galb-sp3	ANb3A	27	2	2
105	GalNAcb1-3GalNAcb-sp3	para-Fs	27	6	6
110	Glca1-4Glcb-sp3	Malt2	27	2	2
112	Glcβ1-6Glcβ-sp4	gent	27	2	2
114	GlcNAcb1-3Manb-sp4	GN3M	27	2	2
121	Manα1-4Manb-sp4	Ma4M	27	6	6
127	Galb1-4Glcb-sp4-Phe	Lac-Phe	27	2	2
128	Galb1-4Glcb-sp4-Trp	Lac-Trp	27	2	2
134	Galb1-4Glcb-sp4-Arg	Lac-Arg	27	2	2
137	Galb1-4Glcb-sp4-Nle	Lac-Nle	27	2	2
150	3-O-Su-Galb1-3GalNAca-sp3	TF3'Su	27	2	2
166	GlcAb1-6Galb-sp3	GUb6A	27	2	2
168	GlcNAcb1-4Mur-L-Ala-D-i-Gln-Lys	GMDPLys	27	2	2
194	6-O-Su-GalNAcb1-4GlcNAcb-sp3	LacdiNAc6'Su	27	2	2
195	6-O-Su-GalNAcb1-4(3-O-Ac)GlcNAcb-sp3	3Ac-LacdiNAc6'Su	27	2	2
196	3-O-Su-GalNAcb1-4(3-O-Su)GlcNAcb-sp3	LacdiNAc3,3'Su2	27	2	2
207	Neu5Acb2-6GalNAcb-sp3	bSiaANb	27	2	2
209	αKdo-(2→4)-αKdo-sp11	A58	27	2	2
211	αKdo-(2→8)-αKdo-sp11	A78	27	2	2
250	GlcNAcb1-3Galb1-4GlcNAcb-sp3	GN3'LN	27	2	2
251	GlcNAcb1-4Galb1-4GlcNAcb-sp2	GN4'LN	27	2	2
253	GlcNAcb1-6Galb1-4GlcNAcb-sp2	GN6'LN	27	2	2
271	Gal1-6Gal1-4Glc-sp4	Gal6'Lac	27	6	6
287	3-O-Su-Galb1-3(Fucα1-4)GlcNAcb-sp3	3'SuLeA	27	2	2
362	Gala1-3(Fuca1-2)Galb1-3GalNAca-sp3	Btype3	27	2	2
396	(GlcNAcb1)3-3,4,6-GalNAca-sp3	GN3-3,4,6Tn	27	2	2
485	Galb1-4GalNAca1-3(Fuca1-2)Galb1-4GlcNAcb-sp3	Ab4ANa3'(Fa2')LN	27	2	2
493	(GlcNAcb1-4)5b-sp4	Ch5	27	2	2
495	Mana1-6(Mana1-3)Mana1-6(Mana1-3)Manb-sp4	(Ma)5b	27	2	2
507	GalNAca1-3GalNAcb1-3Gala1-4Galb1-4Glcb-sp3	Fs-5	27	2	2
808	Gala1-6Glcb-sp3	Aa6G-C3	27	2	2
809	GalNAcb1-3GalNAca-sp3	ANb3ANa	27	2	2
810	GalNGca1-3GalNAca-sp3	core5Gc	27	2	2
817	GalNAcb1-4GalNAca-sp3	ANb4ANa	27	2	2
818	GalNAca1-4GalNAca-sp3	ANa4ANa	27	2	2
12	GlcNAcb-sp7	GN-Ph	25	3	3
18	Manb-sp4	bM	25	3	3
26	Rhab-sp4	bR	25	3	3
82	Gala1-4GlcNAcb-sp8	aLN-PEG	25	3	3
102	GalNAca1-3Galb-sp3	Adi	25	3	3
193	3-O-Su-GalNAcb1-4GlcNAcb-sp3	LacdiNAc3'Su	25	1	1
235	GalNAca1-3(Fuca1-2)Galb-sp3	Atri	25	1	1
850	Galb1-3(6-O-Su)GalNAca-sp3	6SuTF	25	1	1
6	GalNAcb-sp3	bAN	23	0	0
7	Glca-sp3	aG	23	0	0
9	Glcb-sp3	bG	23	0	0
19	ManNAcb-sp4	bMN	23	0	0
23	GalNAcb-sp4	bAN-Gly	23	0	0
24	GlcNAca-sp3	GNa	23	0	0
25	GalNAcb-sp10	bAN-PEG2	23	0	0
37	3-O-Su-Galb-sp3	bA3Su	23	0	0
41	6-O-Su-GalNAca-sp3	aAN6Su	23	0	0
43	6-O-Su-GlcNAcb-sp3	GN6Su	23	0	0
45	GlcAb-sp3	bGU	23	0	0
52	Neu5Gca-sp3	aNeu5Gc	23	4	4
57	D-Ribβ -sp4	bRib	23	4	4
61	3-O-Su-GalNAca-sp3	Tn3Su	23	0	0
71	Fuca1-2Galb-sp3	Hdi	23	4	4
75	Gala1-2Galb-sp3	Aa2A	23	0	0
76	Gala1-3Galb-sp3	Bdi	23	0	0
78	Gala1-3GalNAca-sp3	Taa	23	0	0
84	Galb1-2Galb-sp3	Ab2A	23	0	0
89	Galb1-3GalNAca-sp3	TF	23	0	0
92	Galb1-4Glcb-sp2	Lac-C2	23	0	0
96	Galb1-4GlcNAcb-sp2	LN-C2	23	0	0
97	Galb1-4GlcNAcb-sp3	LN	23	0	0
98	Galb1-4GlcNAcb-sp5	LN-C8	23	0	0
103	GalNAca1-3GalNAca-sp3	core5	23	4	4
115	GlcNAcb1-4GlcNAcb-Asn	Ch2-Asn	23	4	4
132	Galb1-3GalNAca-sp5	TF-С8	23	0	0
136	Galb1-4Glcb-sp4-Ile	Lac-Ile	23	4	4
138	Galb1-4Glcb-sp4-Val	Lac-Val	23	0	0
139	Galb1-4GlcNAca-sp3	LNa	23	0	0
151	6-O-Su-Galb1-3GalNAca-sp3	TF6'Su	23	0	0
156	3-O-Su-Galb1-4GlcNAcb-sp2	LN3'Su-C2	23	0	0
162	6-O-Su-Galb1-4GlcNAcb-sp2	LN6'Su-C2	23	4	4
165	GlcAb1-3Galb-sp3	GUb3A	23	0	0
174	Neu5Gca2-6GalNAca-sp3	Neu5GcTn	23	0	0
180	6-O-Su-Galb1-4(6-O-Su)GlcNAcb-sp2	LN66'Su2	23	0	0
184	4,6-O-Su2-Galb1-4GlcNAcb-sp3	LN4'6'Su2	23	0	0
191	6-P-Galb1-4GlcNAcb-sp2	LN6'P	23	0	0
203	Galb1-4(6-O-Su)GlcNAcb-sp2	LN6Su	23	0	0
210	L,D-Hep-(1→5)-αKdo-4-phosphate-sp11	JN	23	0	0
219	Fuca1-2Galb1-4Glcb-sp4	Htype6	23	0	0
228	Galb1-2Gala1-3GlcNAcb-sp3	Ab2Aa3GN	23	0	0
229	Galb1-3Galb1-4GlcNAcb-sp4	Ab3'LN-Gly	23	4	4
231	Galb1-4GlcNAcb1-3GalNAca-sp3	LN3Tn	23	0	0
234	Galb1-4(Fuca1-3)GlcNAcb-sp3	LeX	23	0	0
236	GalNAca1-3(Fuca1-2)Galb-sp5	Atri-C8	23	0	0
239	GalNAcb1-3(Fuca1-2)Galb-sp3	Fa2(ANb3)A	23	0	0
240	(Glcα1-4)3b-sp4	(Ga4)3b	23	0	0
241	(Glca1-6)3b-sp4	(Ga6)3b	23	4	4
243	GlcNAca1-3Galb1-4GlcNAcb-sp3	GNa3'LN	23	0	0
260	Galb1-3(Fucb1-4)GlcNAcb-sp3	bLeA	23	0	0
269	Gal1-3Gal1-4Glc-sp4	Gal3'Lac	23	4	4
270	Gal1-4Gal1-4Glc-sp4	Gal4'Lac	23	0	0
272	Neu5Ac2-3Gal1-4Glc-sp4-Cit	3'SL-Cit	23	4	4
277	GalN(Gc)a1-3(Fuca1-2)Galb-sp3	NGcAtri	23	4	4
303	Neu5Gca2-3Galb1-4GlcNAcb-sp3	3'SLN(Gc)	23	4	4
304	Neu5Gca2-6Galb1-4GlcNAcb-sp3	6'SLN(Gc)	23	0	0
306	9-NAc-Neu5Aca2-6Galb1-4GlcNAcb-sp3	9NAc-6'SLN	23	4	4
334	Neu5Gcα2-3Galβ1-4(6-O-Su)GlcNAcβ-sp3	3'SLN(Gc)6Su	23	0	0
335	Neu5Acα2-3Galβ1-3(6-O-Su)GlcNAcβ-sp3	3'SiaLeC6Su	23	4	4
336	αKdo-(2→8)-αKdo-(2→4)-αKdo-sp11	A128	23	0	0
337	GalNAc1-4Gal1-4GlcNAc-sp3	ANa4'LN	23	0	0
359	Gala1-3(Fuca1-2)Galb1-3GlcNAcb-sp3	Btype1	23	0	0
369	GalNAca1-4(Fuca1-2)Galb1-4GlcNAcb-sp3	ANa4'(Fa2')LN	23	0	0
371	Fuca1-2Galb1-3(Fuca1-4)GlcNAcb-sp3	LeB	23	0	0
375	Gala1-4GlcNAcb1-3Galb1-4GlcNAcb-sp3	aLN3'LN	23	0	0
383	Galb1-4GlcNAcb1-3Galb1-4Glcb-sp4	LNnT	23	0	0
384	Galb1-4GlcNAcb1-3Galb1-4GlcNAcb-sp2	LN3'LN-C2	23	0	0
386	Galb1-4GlcNAca1-6Galb1-4GlcNAcb-sp2	LNa6'LN	23	0	0
389	GalNAcb1-3Gala1-4Galb1-4Glcb-sp3	Gb4	23	4	4
390	(Glca1-4)4b-sp4	(Ga4)4b	23	0	0
395	GlcNAcb1-6(GlcNAcb1-3)Galb1-4GlcNAcb-sp2	Tk	23	0	0
419	3-O-SuGalb1-4GlcNAcb1-3Galb1-4GlcNAcb-sp3	(3'SuLN)3'LN	23	0	0
431	Neu5Aca2-3Galb1-4(2-O-Su-Fuca1-3)GlcNAcb-sp3	SiaLeX2'''Su	23	0	0
438	Fuc1-2Gal1-4(Fuc1-3)GlcNAc-sp3	LeYbF	23	0	0
439	Kdoα2-4Kdoα2-4Kdoα2-6GlcNAcβ-sp11	A247	23	0	0
496	Fuca1-2Galb1-3(Fuca1-4)GlcNAcb1-3Galb1-4Glcb-sp4	LeBLac	23	0	0
508	GalNAcb1-3(Fuc1-2)Gal1-4(Fuc1-3)GlcNAc-sp3	ALeYb	23	4	4
509	Gal1-3GalNAc1-4(Neu5Ac2-3)Gal1-4Glc-sp4	GM1	23	4	4
531	Neu5Aca2-8Neu5Aca2-3(GalNAcb1-4)Galb1-4Glcb-sp2	GD2	23	0	0
535	Neu5Aca2-8Neu5Aca2-3(GalNAcb1-4)Galb1-4Glcβ-sp4	GD2-Gly	23	8	8
630	(GlcAb1-3GlcNAcb1-4)20-NH(p-C6H4)CH2CH2NH2	HyalU20-ol	23	4	4
801	GalNAca1-3GalNAc(fur)b-sp3	Fs(f)-2	23	0	0
805	GalNAcb1-4(6-O-Bn)GlcNAcb-sp3	6'Bn-LacdiNAc	23	4	4
806	Gala1-6Glca-sp3	Aa6Ga	23	0	0
807	GlcNAcb1-4GlcNAca-sp4	Ch2a	23	0	0
812	Galβ1-4Glcα-sp4	Laca	23	4	4
852	GlcNAcb1-4-[HOOC(CH3)CH]-3-O-GlcNAca-sp4	GN-aMur	23	0	0
16	Mana-sp3	aM	21	1	1
77	Gala1-3GalNAcb-sp3	Tab	21	3	3
212	D-glycero-α-D-talo-octulosonic acid (Ko)-(2→4)-αKdo-sp11	NW61S	21	5	5
254	GlcNAcb1-6(Galb1-3)GalNAca-sp3	core2	21	1	1
326	Neu5Aca2-3Galb1-4Glcb-sp4-Ile	3'SL-Ile	21	1	1
492	(Glca1-6)5b-sp4	(Ga6)5b	21	1	1
2	Gala-sp3	aA	19	2	2
4	GalNAca1-OSer	TnSer	19	2	2
15	HOCH2(HOCH)4CH2NH2	glucitol	19	2	2
22	GlcNAcb-sp4	GN-Gly	19	2	2
27	3,6-O-Me2-Glcβ-sp3	3,6-Me2Glc	19	2	2
30	Glcb-sp4	bG-Gly	19	2	2
32	GalN(Gc)b-sp3	bANGc	19	2	2
38	3-O-Su-GalNAcb-sp3	bAN3Su	19	2	2
46	6-H2PO3Glcb-sp4	G6P	19	2	2
47	6-H2PO3Mana-sp3	M6P	19	2	2
49	Neu5Aca-sp9	Sia-Bn	19	2	2
50	Neu5Acb-sp3	bSia	19	2	2
51	Neu5Acb-sp9	bSia-Bn	19	2	2
58	Fucβ-sp3	bF	19	2	2
63	4-O-Su-GlcNAcb-sp2	GN4Su	19	2	2
65	4-O-Su-GalNAca-sp3	Tn4Su	19	2	2
93	Galb1-4Glcb-sp4	Lac-Gly	19	2	2
94	Galb1-4Galb-sp4	Ab4A	19	2	2
106	GalNAcb1-4GlcNAcb-sp3	LacdiNAc	19	2	2
111	Glcβ1-4Glcβ-sp4	cello	19	2	2
118	GlcNAcb1-6GalNAca-sp3	core6	19	2	2
122	Mana1-6Manb-sp4	Ma6M	19	2	2
143	Fuca1-2(3-O-Su)Galb-sp3	Hdi3Su	19	2	2
149	GlсNAcb1-4(6-O-Su)GlcNAcb-sp2	Ch2-6Su	19	2	2
152	3-O-Su-Galb1-4Glcb-sp2	Lac3'Su	19	2	2
153	6-O-Su-Galb1-4Glcb-sp2	Lac6'Su	19	2	2
159	4-O-Su-Galb1-4GlcNAcb-sp3	LN4'Su	19	2	2
167	GlcNAcb1-4-[HOOC(CH3)CH]-3-O-GlcNAcb-sp4	GN-Mur	19	2	2
169	Neu5Aca2-3Galb-sp3	GM4	19	2	2
170	Neu5Aca2-6Galb-sp3	Sia6A	19	2	2
172	Neu5Aca2-6GalNAca-sp3	SiaTn	19	2	2
176	3-O-Su-Galb1-4(6-O-Su)Glcb-sp2	Lac3',6Su2	19	2	2
181	3,4-O-Su2-Galb1-4GlcNAcb-sp3	LN3'4'Su2	19	2	2
182	3,6-O-Su2-Galb1-4GlcNAcb-sp2	LN3'6'Su2	19	2	2
188	Neu5Aca2-8Neu5Acb-sp9	(Sia)2-bBn	19	2	2
189	3,6-O-Su2-Galb1-4(6-O-Su)GlcNAcb-sp2	LN3'66'Su3	19	6	6
199	4,6-O-Su2-GalNAcb1-4-(3-O-Ac)GlcNAcb-sp3	3Ac-LacdiNAc4',6'Su2	19	2	2
206	Neu5Gca2-3Galβ-sp3	Neu5Gc3A	19	2	2
223	Gala1-4Galb1-4Glcb-sp2	Pk-C2	19	2	2
237	GalNHa1-3(Fuca1-2)Galb-OCH2CH2CH2NHAc	ABtri	19	2	2
256	GlcNAcb1-6(GlcNAcb1-4)GalNAca-sp3	GN2-4,6Tn	19	2	2
258	Mana1-6(Mana1-3)Manb-sp4	(Ma)3b	19	2	2
263	(GalNAcb-PEG2)3-b-DD	ANb-cluster	19	2	2
264	Galb1-4Galb1-4GlcNAcb-sp3	Ab4'LN	19	2	2
274	GalNAca1-3Galb1-4GlcNAcβ-sp3	ANa3'LN	19	2	2
275	GalNAcb1-3Galb1-4GlcNAcβ-sp3	ANb3'LN	19	2	2
278	GalNAcα1-3GalNAcβ1-3Galβ-sp3	Fs-3	19	2	2
288	3-O-Su-Galb1-4(Fuca1-3)GlcNAcb-sp3	3'SuLeX	19	2	2
289	Neu5Aca2-6(Galb1-3)GalNAca-sp3	6SiaTF	19	2	2
293	Neu5Aca2-3Galb1-4Glcb-sp3	3'SL	19	2	2
295	Neu5Aca2-6Galb1-4Glcb-sp2	6'SL-C2	19	2	2
298	Neu5Aca2-3Galb1-4GlcNAcb-sp3	3'SLN	19	2	2
309	Neu5Aca2-6(Neu5Aca2-3)GalNAca-sp3	Sia2-3,6Tn	19	2	2
316	Fuca1-2(6-O-Su)Galb1-4GlcNAcb-sp3	6'SuHtype2	19	2	2
318	Neu5Aca2-6Galb1-4(6-O-Su)GlcNAcb-sp3	6'SLN6Su	19	2	2
319	Neu5Aca2-3(6-O-Su)Galb1-4GlcNAcb-sp3	3'SLN6'Su	19	2	2
320	4-O-Su-Neu5Aca2-3(6-O-Su)Galb1-4GlcNAcb-sp3	3'SLN6',4''Su2	19	2	2
322	(Neu5Aca2-8)3b-sp3	(Sia)3b	19	2	2
325	Neu5Aca2-3Galb1-4Glcb-sp4-Ala	3'SL-Ala	19	2	2
328	Neu5Aca2-3Galb1-4Glcb-sp4-Phe	3'SL-Phe	19	2	2
330	Neu5Aca2-3Galb1-4Glcb-sp4-Val	3'SL-Val	19	2	2
332	Neu5Aca2-3Galb1-4Glcb-sp4-Asn	3’SL-Asn	19	2	2
340	Gala1-3(Neu5Acb2-6)GalNAcb-sp3	b6SiaTab	19	2	2
342	Neu5Acα2-3(6-O-Su)Galβ1-3GalNAcα-sp3	6'Su3'SiaTF	19	2	2
344	Neu5Acb2-3Galb1-4GlcNAcb-sp3	b3’SLN	19	2	2
363	Gala1-3(Fuca1-2)Galb1-3GalNAcb-sp3	Btype4	19	2	2
365	Gala1-4(Fuca1-2)Galb1-4GlcNAcb-sp3	Aa4'(Fa2')LN	19	2	2
366	GalNAca1-3(Fuca1-2)Galb1-3GlcNAcb-sp3	Atype1	19	2	2
370	GalNAcb1-3(Fuca1-2)Galb1-4GlcNAcb-sp3	ANb3'(Fa2')LN	19	2	2
372	Fuca1-2Galb1-4(Fuca1-3)GlcNAcb-sp3	LeY	19	2	2
373	Gala1-3Galb1-4GlcNAcb1-3Galb-sp3	Galili4	19	2	2
387	Galb1-4GlcNAcb1-6Galb1-4GlcNAcb-sp2	LN6'LN	19	2	2
388	Galb1-4GlcNAcb1-6(Galb1-3)GalNAca-sp3	LN6TF	19	2	2
392	GalNAca1-3(Fuca1-2)Galb1-3GalNAca-sp3	A(type 3)	19	2	2
394	GlcNAcb1-4(GlcNAcb1-3)Galb1-4GlcNAcb-sp2	GN2-3',4'LN	19	2	2
402	GalNAca1-3(Fuca1-2)Gala1-4GlcNAcb-sp3	Atria4GN	19	2	2
405	Gala1-3(Fuca1-2)Gala1-4GlcNAcb-sp3	Btria4GN	19	2	2
408	GlcNAcb1-4(GlcNAcb1-3)Galb1-4GlcNAcb-sp3	GN2-3',4'LN-C3	19	2	2
420	4-O-SuGalb1-4GlcNAcb1-3Galb1-4GlcNAcb-sp3	(4'SuLN)3'LN	19	2	2
426	Neu5Aca2-3Galb1-3(Fuca1-4)GlcNAcb-sp3	SiaLeA	19	2	2
432	Neu5Aca2-3Galb1-4(3-O-Su-Fuca1-3)GlcNAcβ-sp3	SiaLeX3'''Su	19	2	2
435	Neu5Aca2-3Galb1-4(2-O-Su-Fuca1-3)(6-O-Su)GlcNAcb-sp3	SiaLeX6,2'''Su2	19	2	2
482	Gala1-3(Fuca1-2)Galb1-3(Fuca1-4)GlcNAcb-sp3	BLeB	19	2	2
483	Gala1-3(Fuca1-2)Galb1-4(Fuca1-3)GlcNAcb-sp3	BLeY	19	2	2
484	GalNAca1-3(Fuca1-2)Galb1-3(Fuca1-4)GlcNAcb-sp3	ALeB	19	2	2
497	Fuca1-2Galb1-4(Fuca1-3)GlcNAcb1-3Galb1-4Glcb-sp4	LeYLac	19	2	2
498	Galb1-4GlcNAcb1-3Galb1-4GlcNAcb1-3Galb1-4GlcNAcb-sp3	(LNb3')3	19	2	2
499	Galb1-4GlcNAcb1-6(Galb1-4GlcNAcb1-3)Galb1-4GlcNAcb-sp2	LN2-3',6'LN	19	2	2
505	(GNβ1-2Mα1)2-3,6-Mβ1-4GNβ1-4GNβ-sp4	7-OS	19	2	2
528	Neu5Aca2-3Galb1-4(Fuca1-3)GlcNAcb1-3Galb-sp3	SiaLeX3A	19	2	2
534	Neu5Aca2-6Galb1-4GlcNAcb1-3Galb1-4GlcNAcb-sp3	6'SLN-LN	19	2	2
537	Neu5Aa2-3Galb1-4GlcNAcb1-3Galb1-4Glcb-sp4	LSTd	19	2	2
545	Kdoα2-8Kdoα2-4Kdoα2GlcNAcβ1-6GlcNAcα-sp11	A218	19	2	2
548	Neu5Aa2-6Galb1-4GlcNAcb1-3Galb1-4GlcNAcb-sp2	6'SLN-LN-C2	19	2	2
627	(Siaα2-6Aβ1-4GNβ1-2Mα1)2-3,6-Mβ1-4GNβ1-4GNβ-sp4	11-OS	19	2	2
632	(GlcAb1-3GlcNAcb1-4)13-NH(p-C6H4)CH2CH2NH2	HyalU13-ol	19	2	2
802	Galb1-3GalNAc(fur)b-sp3	Tbb(f)	19	2	2
815	Gala1-4GalNAca-sp3	Aa4ANa	19	2	2
853	6-O-Su-Galα1-3GalNAcα-sp3	6'SuTaa	19	2	2
204	4-O-Su-GalNAcb1-4GlcNAcb-sp2	LacdiNAc4'Su-C2	17	3	3
242	GlcNAca1-3Galb1-4GlcNAcb-sp2	GNa3'LN-C2	17	1	1
291	Neu5Acb2-6(Galb1-3)GalNAca-sp3	b6SiaTF	17	1	1
338	Neu5Aca2-6Galb1-3GalNAca-sp3	6'SiaTF	17	1	1
423	Neu5Aca2-3Galb1-4(Fuca1-3)GlcNAcb-sp3	SiaLeX	17	1	1
502	(Glca1-6)6b-sp4	(Ga6)6b	17	1	1
530	(Neu5Aca2-3Galb1)2-3,4-GlcNAcb-sp3	(Sia3A)2-3,4GN	17	1	1
14	GlcN(Gc)b-sp4	bGN(Gc)	15	4	4
31	L-Araa-sp4	aAra	15	0	0
54	9-NAc-Neu5Aca-sp3	9NAcSia	15	0	0
59	aKdo-5-phosphate-sp11	A173	15	0	0
64	4-O-Su-Galb-sp3	A4Su	15	0	0
81	Gala1-4GlcNAcb-sp3	aLN	15	0	0
99	Galb1-4GlcNAcb-sp8	LN-PEG	15	0	0
107	GalNAcb1-4GlcNAcb-sp2	LacdiNAc-C2	15	0	0
119	Manα1-2Manb-sp4	Ma2Mb	15	0	0
120	Manα1-3Manb-sp4	Ma3M	15	0	0
133	Galb1-4Glcb-sp4-Ala	Lac-Ala	15	4	4
158	4-O-Su-Galb1-4GlcNAcb-sp2	LN4'Su-C2	15	0	0
173	Neu5Acb2-6GalNAca-sp3	bSiaTn	15	0	0
177	3-O-Su-Galb1-4(6-O-Su)GlcNAcb-sp3	LN3'6Su2	15	0	0
178	6-O-Su-Galb1-4(6-O-Su)Glcb-sp2	Lac6,6'Su2	15	0	0
186	Neu5Aca2-8Neu5Aca2-sp3	(Sia)2	15	0	0
187	Neu5Aca2-8Neu5Aca2-sp9	(Sia)2Bn	15	0	0
190	Galb1-4-(6-P)GlcNAcb-sp2	LN6P	15	0	0
192	GalNAcb1-4(6-O-Su)GlcNAcb-sp3	LacdiNAc6Su	15	0	0
197	3,6-O-Su2-GalNAcb1-4GlcNAcb-sp3	LacdiNAc3',6'Su2	15	0	0
198	4,6-O-Su2-GalNAcb1-4GlcNAcb-sp3	LacdiNAc4',6'Su2	15	0	0
200	4-O-Su-GalNAcb1-4GlcNAcb-sp3	LacdiNAc4'Su	15	0	0
201	3,4-O-Su2-GalNAcb1-4GlcNAcb-sp3	LacdiNAc3',4'Su2	15	0	0
202	6-O-Su-GalNAcb1-4(6-O-Su)GlcNAcb-sp3	LacdiNAc6,6'Su2	15	0	0
205	Neu5Aca2-6GalNAcb-sp3	6SiaANb	15	0	0
213	Neu5Acb2-6Galb-sp3	6bSiaA	15	0	0
214	DGlcAb1-3Galb-sp3	deltaGUb3A	15	0	0
220	Gala1-3Galb1-4Glcb-sp2	Aa3'Lac-C2	15	0	0
221	Gala1-3Galb1-4Glcb-sp4	Aa3'Lac-Gly	15	0	0
225	Gala1-4Galb1-4GlcNAcb-sp2	P1	15	0	0
226	Gala1-3(Fuca1-2)Galb-sp3	Btri	15	0	0
227	Gala1-3(Fuca1-2)Galb-sp5	Btri-C8	15	0	0
232	Galb1-4GlcNAcb1-6GalNAca-sp3	LN6Tn	15	0	0
245	GlcNAca1-6Galb1-4GlcNAcb-sp2	GNa6'LN	15	0	0
246	GlcNAcb1-2Galb1-3GalNAca-sp3	GN2'TF	15	0	0
290	Neu5Aca2-6(Gala1-3)GalNAca-sp3	A3a(Sia)Tn	15	0	0
292	Neu5Aca2-3Galb1-3GalNAca-sp3	Sia3'TF	15	0	0
294	Neu5Aca2-3Galb1-4Glcb-sp4	3'SL-Gly	15	0	0
296	Neu5Aca2-6Galb1-4Glcb-sp4	6'SL-Gly	15	0	0
297	Neu5Acb2-6Galb1-4Glcb-sp2	b6'SL	15	0	0
302	Neu5Acb2-6Galb1-4GlcNAcb-sp3	b6'SLN	15	0	0
305	Neu5Gcb2-6Galb1-4GlcNAcb-sp3	b6'SLN(Gc)	15	0	0
308	KDNa2-3Galb1-4GlcNAcb-sp2	KDN3'LN	15	0	0
310	Neu5Aca2-3Galb1-4GlcNAcb-O(CH2)3NH-amide-Neu5Aca2-3Galb1-4GlcNAcb-sp3	(3'SLN)2	15	0	0
315	Neu5Aca2-3Galb1-4-(6-O-Su)GlcNAcb-sp3	3'SLN6Su	15	0	0
321	(Neu5Aca2-8)3-sp3	(Sia)3	15	0	0
327	Neu5Aca2-3Galb1-4Glcb-sp4-Nle	3'SL-Nle	15	0	0
333	Neu5Gcα2-3Galβ1-3(6-O-Su)GlcNAcβ-sp3	3'SiaLeC(Gc)6Su	15	0	0
339	Neu5Acb2-6Galb1-3GalNAca-sp3	6'bSiaTF	15	0	0
341	Neu5Aca2-3-(6-O-Su)Galb1-4GlcNAcb-sp2	6'Su3'SLN	15	0	0
360	Gala1-3(Fuca1-2)Galb1-4GlcNAcb-sp3	Btype2	15	0	0
361	Gala1-3(Fuca1-2)Galb1-4GlcNAcb-sp2	Btype2-C2	15	0	0
368	GalNAca1-3(Fuca1-2)Galb1-4GlcNAcb-sp3	Atype2	15	0	0
374	Gala1-3(Gala1-4)Galb1-4GlcNAcb-sp3	Aa2-3',4'LN	15	0	0
404	GalNAc1-3Gal1-4(Fuc1-3)GlcNAc-sp3	ANaLeX	15	0	0
407	Galb1-4GlcNAcb1-3Galb1-4Glca-sp4	LNnTa	15	4	4
425	Neu5Aca2-3Galb1-4(Fucb1-3)GlcNAcb-sp3	bF-SiaLeX	15	0	0
428	Neu5Aca2-3Galb1-4(Fuca1-3)(6-O-Su)GlcNAcb-sp3	SiaLeX6Su	15	0	0
433	Neu5Aca2-6(Neu5Aca2-3Galb1-3)GalNAca-sp3	Sia2-3',6TF	15	0	0
434	Neu5Aca2-8Neu5Aca2-3Galbl-4Glcb-sp4	GD3	15	4	4
436	4-O-Su-Neu5Aca2-3Galb1-4(Fuca1-3)(6-O-Su)GlcNAcb-sp3	SiaLeX6,4''Su2	15	0	0
440	Neu5Ac2-6(Fuc1-2)Gal1-4GlcNAc-sp3	bSia6'Htype2	15	0	0
489	Galb1-4GlcNAcb1-3(GlcNAcb1-6)Galb1-4GlcNAcb-sp2	LN3'(GN6')LN	15	0	0
491	GalNAca1-3(Fuca1-2)Galb1-4(Fuca1-3)GlcNAcb-sp3	ALeY	15	0	0
504	(Aβ1-4GNβ1-2Mα1)2-3,6-Mβ1-4GNβ1-4GNβ-sp4	9-OS	15	0	0
527	Neu5Aca2-3Galb1-4GlcNAcb1-3Galb1-4GlcNAcb-sp2	3'SLN-LN	15	0	0
540	Galb1-4(Fuca1-3)GlcNAcb1-6(Neu5Acα2-6Galb1-4GlcNAcb1-3)Galb1-4Glcb-sp4	MSMFLNnH	15	0	0
546	Neu5Aa2-3Galb1-4GlcNAcb1-3Galb1-4Glca-sp4	LSTda	15	0	0
625	(GlcAb1-3GlcNAcb1-4)11-12-NH2-ol	HyalU(11-12)-ol	15	0	0
804	[Galb1-4GlcNAcb-OCH2CH2]2NH	LN_dimer	15	0	0
814	Manα1-6Manα-sp4	Ma6Ma	15	0	0
816	Galb1-4GalNAca-sp3	Ab4ANa	15	0	0
851	Gala1-3(6-O-Su)GalNAca-sp3	6SuTaa	15	0	0
854	(6-O-Su)Neu5Aca2-3Galb-sp3	Sia3A6'Su	15	0	0
266	Gala1-4Galb1-4GlcNAcb-sp3	P1	13	1	1
300	Neu5Aca2-6Galb1-4GlcNAcb-sp3	6'SLN	13	1	1
811	3,6-O-Me2-Glcβ1-4(2,3-O-Me2)Rhaβ-O(p-C6H4)-OCH2CH2NH2	KN05097	13	1	1
62	GlcAβ-sp2	bGN-C2	11	2	2
146	Galb1-4(6-O-Su)Glcb-sp2	Lac6Su	11	2	2
217	Fuca1-2Galb1-3GalNAca-sp3	Htype3	11	2	2
273	Fucb1-2Galb1-4GlcNAcβ-sp3	Fb2LN	11	2	2
429	Neu5Aca2-3(6-O-Su)Galb1-4(Fuca1-3)GlcNAcb-sp3	SiaLeX6'Su	11	2	2
510	Mana1-6(Mana1-3)Mana1-6(Mana1-3)Mana-sp4	Man5a	11	2	2
631	(GlcAb1-3GlcNAcb1-4)38-NH(p-C6H4)CH2CH2NH2	HyalU38-ol	11	2	2
222	Gala1-3Galb1-4GlcNAcb-sp3	Galili3	7	0	0
LEGEND:
sp2 = C2 = -O(CH2)2NH2
sp3 = C3 = -O(CH2)3NH2
sp4 =Gly = -NHCOCH2NH2
sp5 =C8 = -O(CH2)3NH-CO(CH2)5NH2
sp6 = NH(p-C6H4)CH2CH2NH2 (as-aminoalditol)
sp7 = Ph = -OC6H4-p-NH2
sp8 = PEG = -(OCH2CH2)6NH2
sp9 = Bn = -OCH2C6H4-p-NHCOCH2NH2
sp10 = PEG2 = -(OCH2CH2)2NH2
sp11 = -OCH2CH2CH2SCH2CH2NH2
sp12 = PEG3 = H2N-(CH2CH2O)3-CH2CH2CO
A = Gal
AN = GalNAc
Ch = chito
F = L-Fuc
G = Glc
Gc = glycolyl
GN = GlcNAcb
R = Rha
i = iso
(fur, f) = furanose cycle
Fm = formyl
Lac = lactose
LN = N-acetyllactosamine
M = Man
MN = ManNAc
Malt = maltose
OS = oligosaccharide
P = phosphate
S = Sia = Neu5Aca
Su = sulfate
Tn = GalNAca
U = uronic acid

## Sheet: Suppl Table S2
	Supplementary Table S2.
	Profiling of human antibodies isolated from CIP using the affinity adsorbent LeC-Sepharose, printed glycan array data
Slide:	slide H Schott Nexterion
Slide #	10089159
Amount of ligands: 422 aminospacered glycans
Printing	sciFLEXARRAYER S5 non-contact piezo-arrayer (Scienion, Berlin, Germany) with installed quality control system (pre- and post-drop controls). The drop volume was approximately 0.9 nL
Quality control: staining of 4% of slides in one batch by the standart serum as well as the plant lectin mix. The correlation coefficient between slides within one batch was higher than 0.9
			IgG							IgM
Nr (CarbLab)	Structure	Short Name	Median	25%-quartile	75%-quartile		Nr (CarbLab)	Structure	Short Name	Median	25%-quartile	75%-quartile
80	Gala1-3GlcNAcb-sp3	Aa3GN	65535	0	0		398	Galb1-3GlcN(Fm)b1-3Galb1-3GlcNAcb-sp3	LeC(Fm)3'LeC	35059	4452	3365
399	Galb1-3GlcNAca1-3Galb1-3GlcNAcb-sp2	LeCa3'LeC-C2	65535	0	0		399	Galb1-3GlcNAca1-3Galb1-3GlcNAcb-sp2	LeCa3'LeC-C2	32599	791	1047
398	Galb1-3GlcN(Fm)b1-3Galb1-3GlcNAcb-sp3	LeC(Fm)3'LeC	57762	4506	5933		331	Neu5Gca2-3Galb1-3GlcNAcb-sp3	3'SiaLeC(Gc)	28282	682	1872
331	Neu5Gca2-3Galb1-3GlcNAcb-sp3	3'SiaLeC(Gc)	51478	687	2069		80	Gala1-3GlcNAcb-sp3	Aa3GN	26403	2317	2081
55	3-O-Su-GlcNAcb-sp3	GN3Su	42899	3972	2804		401	Galb1-3GlcNAcb1-3Galb1-3GlcNAcb-sp3	LeC3'LeC	24388	1206	505
299	Neu5Aca2-3Galb1-3GlcNAcb-sp3	3'SiaLeC	42500	1612	5956		377	Galb1-3GlcNAcb1-3Galb1-3GlcNAcb-sp2	LeCb3'LeC	23872	5640	1259
74	Fucb1-3GlcNAcb-sp3	Fb3GN	38988	6668	2203		85	Galb1-3GlcNAcb-sp3	LeC	23783	1793	2534
154	3-O-Su-Galb1-3GlcNAcb-sp3	LeC3'Su	37158	766	1226		74	Fucb1-3GlcNAcb-sp3	Fb3GN	23238	4470	2648
307	KDNa2-3Galb1-3GlcNAcb-sp2	KDN3'LeC	36909	6097	8177		307	KDNa2-3Galb1-3GlcNAcb-sp2	KDN3'LeC	22912	3439	2610
808	Gala1-6Glcb-sp3	Aa6G-C3	36522	6274	7758		299	Neu5Aca2-3Galb1-3GlcNAcb-sp3	3'SiaLeC	22902	4835	2152
401	Galb1-3GlcNAcb1-3Galb1-3GlcNAcb-sp3	LeC3'LeC	34661	5647	882		267	GlcNAcb1-3Galb1-3GlcNAcb-sp3	GlcNAc3'Lec	22501	2311	714
377	Galb1-3GlcNAcb1-3Galb1-3GlcNAcb-sp2	LeCb3'LeC	34580	4343	5978		154	3-O-Su-Galb1-3GlcNAcb-sp3	LeC3'Su	22465	453	555
85	Galb1-3GlcNAcb-sp3	LeC	34498	1698	2112		55	3-O-Su-GlcNAcb-sp3	GN3Su	17650	1643	3198
378	Galb1-3GlcNAca1-3Galb1-4GlcNAcb-sp3	LeCa3'LN	32410	1316	670		86	Galb1-3GlcNAcb-sp2	LeC-C2	14401	5007	4147
397	Galb1-3GlcN(Fm)b1-3Galb1-4GlcNAcb-sp3	LeC(Fm)b3'LN	31832	1399	1098		164	GlcAb1-3GlcNAcb-sp3	GUb3GN	13825	2211	1031
81	Gala1-4GlcNAcb-sp3	aLN	31720	1917	731		161	6-O-Su-Galb1-3GlcNAcb-sp3	LeC6'Su	10960	1842	1470
267	GlcNAcb1-3Galb1-3GlcNAcb-sp3	GlcNAc3'Lec	30900	1458	3064		160	6-O-Su-Galb1-3GlcNAcb-sp2	LeC6'Su-C2	10236	839	1151
380	Galb1-3GlcNAca1-6Galb1-4GlcNAcb-sp2	LeCa6'LN	29055	1099	853		130	(6-O-Bn-Galb1)-3GlcNAcb-sp3	6'BnLeC	10198	984	574
375	Gala1-4GlcNAcb1-3Galb1-4GlcNAcb-sp3	aLN3'LN	25676	1722	1285		10	GlcNAcb-sp3	GN	8284	1386	2407
164	GlcAb1-3GlcNAcb-sp3	GUb3GN	25153	1111	1608		11	GlcNAcb-sp2	GN-C2	6442	1427	862
279	Galβ1-3GlcNAcα1-3GalNAcα-sp3	LeCa3Tn	23804	348	1046		72	Fuca1-3GlcNAcb-sp3	Fa3GN	6246	761	419
82	Gala1-4GlcNAcb-sp8	aLN-PEG	23116	2981	1128		378	Galb1-3GlcNAca1-3Galb1-4GlcNAcb-sp3	LeCa3'LN	5595	382	317
126	6-Bn-Gala1-4(6-Bn)GlcNAcb-sp3	Bn2-aLN	23070	1262	2364		397	Galb1-3GlcN(Fm)b1-3Galb1-4GlcNAcb-sp3	LeC(Fm)b3'LN	5241	880	311
86	Galb1-3GlcNAcb-sp2	LeC-C2	22524	12054	5460		380	Galb1-3GlcNAca1-6Galb1-4GlcNAcb-sp2	LeCa6'LN	4249	275	473
130	(6-O-Bn-Galb1)-3GlcNAcb-sp3	6'BnLeC	20918	1162	1322		81	Gala1-4GlcNAcb-sp3	aLN	4234	34	54
161	6-O-Su-Galb1-3GlcNAcb-sp3	LeC6'Su	20534	2336	1504		375	Gala1-4GlcNAcb1-3Galb1-4GlcNAcb-sp3	aLN3'LN	4212	537	243
806	Gala1-6Glca-sp3	Aa6Ga	19284	2157	5452		88	Galb1-3GalNAcb-sp3	Tbb	4186	570	254
83	Gala1-6Glcb-sp4	Aa6G	17774	2340	2360		323	Neu5Aca2-6Galb1-3GlcNAcβ-sp3	6'SiaLeC	3611	385	153
160	6-O-Su-Galb1-3GlcNAcb-sp2	LeC6'Su-C2	16647	210	1173		126	6-Bn-Gala1-4(6-Bn)GlcNAcb-sp3	Bn2-aLN	3544	447	409
88	Galb1-3GalNAcb-sp3	Tbb	11866	956	730		24	GlcNAca-sp3	GNa	3487	699	540
10	GlcNAcb-sp3	GN	11092	1781	1617		82	Gala1-4GlcNAcb-sp8	aLN-PEG	3059	153	313
11	GlcNAcb-sp2	GN-C2	8106	1051	1068		279	Galβ1-3GlcNAcα1-3GalNAcα-sp3	LeCa3Tn	3024	195	165
131	(6-O-Bn-Galb1)-3(6-O-Bn)GlcNAcb-sp3	Bn2LeC	8103	711	665		129	Galb1-3(6-O-Bn)GlcNAcb-sp3	6BnLeC	2768	311	406
72	Fuca1-3GlcNAcb-sp3	Fa3GN	7923	195	81		131	(6-O-Bn-Galb1)-3(6-O-Bn)GlcNAcb-sp3	Bn2LeC	2502	170	85
129	Galb1-3(6-O-Bn)GlcNAcb-sp3	6BnLeC	7370	277	232		243	GlcNAca1-3Galb1-4GlcNAcb-sp3	GNa3'LN	2356	351	233
24	GlcNAca-sp3	GNa	7118	198	1450		382	Galb1-3GalNAcb1-4Galb1-4Glcb-sp3	aGM1	1923	531	272
323	Neu5Aca2-6Galb1-3GlcNAcβ-sp3	6'SiaLeC	5694	819	187		800	GlcNAca1-4GlcNAcb-sp3	GNa4GN	1776	161	130
382	Galb1-3GalNAcb1-4Galb1-4Glcb-sp3	aGM1	4156	320	212		381	Galb1-3GlcNAcb1-6Galb1-4GlcNAcb-sp2	LeCb6'LN	1770	564	210
243	GlcNAca1-3Galb1-4GlcNAcb-sp3	GNa3'LN	3512	260	406		13	GlcNAcb-sp8	GN-PEG	1595	136	172
179	6-O-Su-Galb1-3(6-O-Su)GlcNAcb-sp2	LeC6,6'Su2	3124	604	320		145	Galb1-3(6-O-Su)GlcNAcb-sp3	LeC6Su	1542	96	239
145	Galb1-3(6-O-Su)GlcNAcb-sp3	LeC6Su	2783	1021	351		501	Galb1-3GalNAcb1-3Gala1-4Galb1-4Glcb-sp4	Gb5	1418	32	28
262	Galb1-3GalNAcb1-3Galβ-sp4	Tbb-A	2740	264	281		242	GlcNAca1-3Galb1-4GlcNAcb-sp2	GNa3'LN-C2	1384	268	228
134	Galb1-4Glcb-sp4-Arg	Lac-Arg	2622	114	210		140	Gala1-3GalNAc(fur)b-sp3	Tab(f)	1233	314	67
127	Galb1-4Glcb-sp4-Phe	Lac-Phe	2376	25	89		179	6-O-Su-Galb1-3(6-O-Su)GlcNAcb-sp2	LeC6,6'Su2	1217	289	69
501	Galb1-3GalNAcb1-3Gala1-4Galb1-4Glcb-sp4	Gb5	2342	27	189		118	GlcNAcb1-6GalNAca-sp3	core6	1213	369	314
800	GlcNAca1-4GlcNAcb-sp3	GNa4GN	2311	114	47		808	Gala1-6Glcb-sp3	Aa6G-C3	1190	402	334
128	Galb1-4Glcb-sp4-Trp	Lac-Trp	2229	844	47		263	(GalNAcb-PEG2)3-b-DD	ANb-cluster	1181	87	68
137	Galb1-4Glcb-sp4-Nle	Lac-Nle	2212	54	191		262	Galb1-3GalNAcb1-3Galβ-sp4	Tbb-A	1032	259	188
324	Neu5Aca2-6Galb1-3(6-O-Su)GlcNAcβ-sp3	6'SiaLeC6Su	2162	277	227		19	ManNAcb-sp4	bMN	990	128	67
136	Galb1-4Glcb-sp4-Ile	Lac-Ile	2086	692	22		144	Galb1-3(6-O-Su)GlcNAcb-sp2	LeC6Su-C2	989	169	144
242	GlcNAca1-3Galb1-4GlcNAcb-sp2	GNa3'LN-C2	2079	251	282		324	Neu5Aca2-6Galb1-3(6-O-Su)GlcNAcβ-sp3	6'SiaLeC6Su	921	63	77
376	Galb1-3GlcNAcb1-3Galb1-4Glcb-sp4	LNT	2026	228	208		542	Galb1-3GlcNAcb1-3Galb1-4(Fuca1-3)GlcNAcb1-6(Galb1-3GlcNAcb1-3)Galb1-4Glcb-sp4	MF(1-3)iLNO	892	404	100
381	Galb1-3GlcNAcb1-6Galb1-4GlcNAcb-sp2	LeCb6'LN	2019	412	604		245	GlcNAca1-6Galb1-4GlcNAcb-sp2	GNa6'LN	884	39	57
138	Galb1-4Glcb-sp4-Val	Lac-Val	2014	222	98		801	GalNAca1-3GalNAc(fur)b-sp3	Fs(f)-2	860	238	68
140	Gala1-3GalNAc(fur)b-sp3	Tab(f)	1975	641	547		102	GalNAca1-3Galb-sp3	Adi	751	19	102
144	Galb1-3(6-O-Su)GlcNAcb-sp2	LeC6Su-C2	1975	57	210		802	Galb1-3GalNAc(fur)b-sp3	Tbb(f)	728	75	176
481	Gala1-3Galb1-4GlcNAcb1-3Galb1-4Glcb-sp4	Galili5	1878	50	219		142	GlcNAca1-3GalNAcb-sp3	GNa3AN	682	100	38
133	Galb1-4Glcb-sp4-Ala	Lac-Ala	1829	131	85		25	GalNAcb-sp10	bAN-PEG2	620	136	58
383	Galb1-4GlcNAcb1-3Galb1-4Glcb-sp4	LNnT	1749	97	228		806	Gala1-6Glca-sp3	Aa6Ga	620	115	186
497	Fuca1-2Galb1-4(Fuca1-3)GlcNAcb1-3Galb1-4Glcb-sp4	LeYLac	1724	196	148		83	Gala1-6Glcb-sp4	Aa6G	616	54	185
93	Galb1-4Glcb-sp4	Lac-Gly	1685	207	54		215	Fuca1-2Galb1-3GlcNAcb-sp3	LeD	609	120	146
19	ManNAcb-sp4	bMN	1668	144	100		274	GalNAca1-3Galb1-4GlcNAcβ-sp3	ANa3'LN	609	137	50
496	Fuca1-2Galb1-3(Fuca1-4)GlcNAcb1-3Galb1-4Glcb-sp4	LeBLac	1614	78	98		6	GalNAcb-sp3	bAN	600	45	20
506	Arafb1-2Arafa1-5(Arafb1-2Arafa1-3)Arafa1-5Arafa-O(CH2)2NHCOCH2(OCH2CH2)6NH2	Araf6	1560	574	621		73	Fuca1-4GlcNAcb-sp3	Le	519	13	49
208	Gal1-3GlcNAc-sp4	LeC-Gly	1548	455	453		228	Galb1-2Gala1-3GlcNAcb-sp3	Ab2Aa3GN	510	122	43
13	GlcNAcb-sp8	GN-PEG	1539	247	254		128	Galb1-4Glcb-sp4-Trp	Lac-Trp	503	46	32
118	GlcNAcb1-6GalNAca-sp3	core6	1449	255	190		506	Arafb1-2Arafa1-5(Arafb1-2Arafa1-3)Arafa1-5Arafa-O(CH2)2NHCOCH2(OCH2CH2)6NH2	Araf6	490	204	6
245	GlcNAca1-6Galb1-4GlcNAcb-sp2	GNa6'LN	1428	129	104		32	GalN(Gc)b-sp3	bANGc	472	55	53
802	Galb1-3GalNAc(fur)b-sp3	Tbb(f)	1398	140	107		71	Fuca1-2Galb-sp3	Hdi	472	264	130
366	GalNAca1-3(Fuca1-2)Galb1-3GlcNAcb-sp3	Atype1	1346	23	93		496	Fuca1-2Galb1-3(Fuca1-4)GlcNAcb1-3Galb1-4Glcb-sp4	LeBLac	464	26	16
479	Fuca1-2Galb1-3GlcNAcb1-3Galb1-4Glcb-sp4	Htype1Lac	1310	7	93		366	GalNAca1-3(Fuca1-2)Galb1-3GlcNAcb-sp3	Atype1	458	227	6
537	Neu5Aa2-3Galb1-4GlcNAcb1-3Galb1-4Glcb-sp4	LSTd	1294	54	160		252	GlcNAcb1-4GlcNAcb1-4GlcNAcb-sp4	Ch3	447	78	17
102	GalNAca1-3Galb-sp3	Adi	1284	136	272		811	3,6-O-Me2-Glcβ1-4(2,3-O-Me2)Rhaβ-O(p-C6H4)-OCH2CH2NH2	KN05097	440	21	74
235	GalNAca1-3(Fuca1-2)Galb-sp3	Atri	1241	13	97		278	GalNAcα1-3GalNAcβ1-3Galβ-sp3	Fs-3	430	50	39
329	Neu5Aca2-3Galb1-4Glcb-sp4-Trp	3'SL-Trp	1216	95	86		545	Kdoα2-8Kdoα2-4Kdoα2GlcNAcβ1-6GlcNAcα-sp11	A218	430	73	48
392	GalNAca1-3(Fuca1-2)Galb1-3GalNAca-sp3	A(type 3)	1202	26	40		376	Galb1-3GlcNAcb1-3Galb1-4Glcb-sp4	LNT	404	44	11
437	GalNAca1-3(Fuca1-2)Galb1-3GalNAcb-sp3	A(type 4)	1198	80	70		127	Galb1-4Glcb-sp4-Phe	Lac-Phe	400	21	17
215	Fuca1-2Galb1-3GlcNAcb-sp3	LeD	1184	134	146		359	Gala1-3(Fuca1-2)Galb1-3GlcNAcb-sp3	Btype1	398	110	75
536	Neu5Aa2-3Galb1-3GlcNAcb1-3Galb1-4Glcb-sp4	LSTa	1156	176	258		807	GlcNAcb1-4GlcNAca-sp4	Ch2a	395	22	25
142	GlcNAca1-3GalNAcb-sp3	GNa3AN	1036	80	37		503	(GlcNAcb1-4)6-sp4	Ch6	349	177	8
172	Neu5Aca2-6GalNAca-sp3	SiaTn	984	122	36		373	Gala1-3Galb1-4GlcNAcb1-3Galb-sp3	Galili4	342	90	182
278	GalNAcα1-3GalNAcβ1-3Galβ-sp3	Fs-3	981	58	64		493	(GlcNAcb1-4)5b-sp4	Ch5	340	49	36
221	Gala1-3Galb1-4Glcb-sp4	Aa3'Lac-Gly	963	410	79		75	Gala1-2Galb-sp3	Aa2A	336	68	18
327	Neu5Aca2-3Galb1-4Glcb-sp4-Nle	3'SL-Nle	956	44	115		101	GalNAca1-3GalNAcb-sp3	Fs-2	330	21	22
135	Galb1-4Glcb-sp4-Asn	Lac-Asn	944	58	46		41	6-O-Su-GalNAca-sp3	aAN6Su	328	19	37
529	Neu5Aca2-6(Galb1-3)GlcNAcb1-3Galb1-4Glcb-sp4	LSTb	934	67	232		208	Gal1-3GlcNAc-sp4	LeC-Gly	326	67	45
542	Galb1-3GlcNAcb1-3Galb1-4(Fuca1-3)GlcNAcb1-6(Galb1-3GlcNAcb1-3)Galb1-4Glcb-sp4	MF(1-3)iLNO	928	164	32		137	Galb1-4Glcb-sp4-Nle	Lac-Nle	324	26	52
246	GlcNAcb1-2Galb1-3GalNAca-sp3	GN2'TF	898	35	130		134	Galb1-4Glcb-sp4-Arg	Lac-Arg	317	21	17
228	Galb1-2Gala1-3GlcNAcb-sp3	Ab2Aa3GN	882	50	191		3	Galb-sp3	bA	314	19	16
269	Gal1-3Gal1-4Glc-sp4	Gal3'Lac	866	190	153		27	3,6-O-Me2-Glcβ-sp3	3,6-Me2Glc	308	33	12
545	Kdoα2-8Kdoα2-4Kdoα2GlcNAcβ1-6GlcNAcα-sp11	A218	854	321	282		439	Kdoα2-4Kdoα2-4Kdoα2-6GlcNAcβ-sp11	A247	308	72	94
801	GalNAca1-3GalNAc(fur)b-sp3	Fs(f)-2	841	214	326		132	Galb1-3GalNAca-sp5	TF-С8	303	56	18
274	GalNAca1-3Galb1-4GlcNAcβ-sp3	ANa3'LN	826	72	83		253	GlcNAcb1-6Galb1-4GlcNAcb-sp2	GN6'LN	303	137	34
328	Neu5Aca2-3Galb1-4Glcb-sp4-Phe	3'SL-Phe	824	229	193		43	6-O-Su-GlcNAcb-sp3	GN6Su	298	43	25
509	Gal1-3GalNAc1-4(Neu5Ac2-3)Gal1-4Glc-sp4	GM1	812	111	82		151	6-O-Su-Galb1-3GalNAca-sp3	TF6'Su	294	20	82
263	(GalNAcb-PEG2)3-b-DD	ANb-cluster	791	63	85		850	Galb1-3(6-O-Su)GalNAca-sp3	6SuTF	282	133	96
439	Kdoα2-4Kdoα2-4Kdoα2-6GlcNAcβ-sp11	A247	782	158	273		136	Galb1-4Glcb-sp4-Ile	Lac-Ile	279	34	42
149	GlсNAcb1-4(6-O-Su)GlcNAcb-sp2	Ch2-6Su	760	36	36		251	GlcNAcb1-4Galb1-4GlcNAcb-sp2	GN4'LN	279	81	49
326	Neu5Aca2-3Galb1-4Glcb-sp4-Ile	3'SL-Ile	736	174	51		149	GlсNAcb1-4(6-O-Su)GlcNAcb-sp2	Ch2-6Su	271	19	24
402	GalNAca1-3(Fuca1-2)Gala1-4GlcNAcb-sp3	Atria4GN	735	60	61		56	Gala-sp7	aA-Ph	270	136	72
112	Glcβ1-6Glcβ-sp4	gent	730	119	197		138	Galb1-4Glcb-sp4-Val	Lac-Val	268	14	33
6	GalNAcb-sp3	bAN	708	22	27		509	Gal1-3GalNAc1-4(Neu5Ac2-3)Gal1-4Glc-sp4	GM1	266	16	41
236	GalNAca1-3(Fuca1-2)Galb-sp5	Atri-C8	684	65	54		105	GalNAcb1-3GalNAcb-sp3	para-Fs	264	80	7
101	GalNAca1-3GalNAcb-sp3	Fs-2	678	260	8		77	Gala1-3GalNAcb-sp3	Tab	262	35	28
25	GalNAcb-sp10	bAN-PEG2	674	100	52		112	Glcβ1-6Glcβ-sp4	gent	252	45	66
625	(GlcAb1-3GlcNAcb1-4)11-12-NH2-ol	HyalU(11-12)-ol	672	125	16		93	Galb1-4Glcb-sp4	Lac-Gly	248	28	3
73	Fuca1-4GlcNAcb-sp3	Le	666	37	21		235	GalNAca1-3(Fuca1-2)Galb-sp3	Atri	246	19	32
442	Neu5Aca2-3(GalNAcb1-4)Galb1-4Glcb-sp4	GM2	666	101	156		276	GlcNAcb1-4Galb1-4GlcNAcb-sp3	GN4'LN-C3	246	6	14
330	Neu5Aca2-3Galb1-4Glcb-sp4-Val	3'SL-Val	660	32	46		84	Galb1-2Galb-sp3	Ab2A	244	71	52
75	Gala1-2Galb-sp3	Aa2A	648	20	36		139	Galb1-4GlcNAca-sp3	LNa	244	18	15
807	GlcNAcb1-4GlcNAca-sp4	Ch2a	636	8	8		406	GalNAca1-3(Fuca1-2)Gala1-3GalNAcb-sp3	Atria3AN	244	112	28
54	9-NAc-Neu5Aca-sp3	9NAcSia	630	29	52		5	GalNAca-sp3	Tn	242	33	42
359	Gala1-3(Fuca1-2)Galb1-3GlcNAcb-sp3	Btype1	610	15	189		239	GalNAcb1-3(Fuca1-2)Galb-sp3	Fa2(ANb3)A	241	31	73
60	6-O-Su-Galb-sp3	bA6Su	600	56	47		133	Galb1-4Glcb-sp4-Ala	Lac-Ala	239	21	35
272	Neu5Ac2-3Gal1-4Glc-sp4-Cit	3'SL-Cit	591	37	31		60	6-O-Su-Galb-sp3	bA6Su	238	17	14
211	αKdo-(2→8)-αKdo-sp11	A78	590	59	76		329	Neu5Aca2-3Galb1-4Glcb-sp4-Trp	3'SL-Trp	236	25	45
270	Gal1-4Gal1-4Glc-sp4	Gal4'Lac	584	82	94		543	Fuca1-2Galb1-3(Fuca1-4)GlcNAcb1-3[Galb1-4(Fuca1-3)GlcNAcb1-6]Galb1-4Glcb-sp4	TFLNH	236	19	10
368	GalNAca1-3(Fuca1-2)Galb1-4GlcNAcb-sp3	Atype2	582	88	30		125	6-Bn-Galb1-4GlcNAcb-sp2	6'Bn-LN	234	15	29
294	Neu5Aca2-3Galb1-4Glcb-sp4	3'SL-Gly	573	39	124		12	GlcNAcb-sp7	GN-Ph	230	40	18
151	6-O-Su-Galb1-3GalNAca-sp3	TF6'Su	552	148	122		271	Gal1-6Gal1-4Glc-sp4	Gal6'Lac	220	22	10
3	Galb-sp3	bA	549	49	14		507	GalNAca1-3GalNAcb1-3Gala1-4Galb1-4Glcb-sp3	Fs-5	220	80	77
12	GlcNAcb-sp7	GN-Ph	548	37	26		246	GlcNAcb1-2Galb1-3GalNAca-sp3	GN2'TF	216	17	23
41	6-O-Su-GalNAca-sp3	aAN6Su	540	90	88		481	Gala1-3Galb1-4GlcNAcb1-3Galb1-4Glcb-sp4	Galili5	212	4	14
251	GlcNAcb1-4Galb1-4GlcNAcb-sp2	GN4'LN	524	136	111		287	3-O-Su-Galb1-3(Fucα1-4)GlcNAcb-sp3	3'SuLeA	206	70	4
325	Neu5Aca2-3Galb1-4Glcb-sp4-Ala	3'SL-Ala	520	88	83		227	Gala1-3(Fuca1-2)Galb-sp5	Btri-C8	204	16	8
252	GlcNAcb1-4GlcNAcb1-4GlcNAcb-sp4	Ch3	518	52	76		256	GlcNAcb1-6(GlcNAcb1-4)GalNAca-sp3	GN2-4,6Tn	204	2	10
276	GlcNAcb1-4Galb1-4GlcNAcb-sp3	GN4'LN-C3	512	43	29		211	αKdo-(2→8)-αKdo-sp11	A78	203	17	32
20	Rhaa-sp3	aR	510	29	74		38	3-O-Su-GalNAcb-sp3	bAN3Su	202	68	67
71	Fuca1-2Galb-sp3	Hdi	495	95	59		529	Neu5Aca2-6(Galb1-3)GlcNAcb1-3Galb1-4Glcb-sp4	LSTb	202	47	30
336	αKdo-(2→8)-αKdo-(2→4)-αKdo-sp11	A128	492	170	177		20	Rhaa-sp3	aR	198	12	49
84	Galb1-2Galb-sp3	Ab2A	490	67	43		54	9-NAc-Neu5Aca-sp3	9NAcSia	194	28	12
209	αKdo-(2→4)-αKdo-sp11	A58	484	22	71		113	GlcNAcb1-3GalNAca-sp3	core3	193	41	23
853	6-Su-O-Galα1-3GalNAcα-sp3	6'SuTaa	479	66	51		254	GlcNAcb1-6(Galb1-3)GalNAca-sp3	core2	193	88	107
167	GlcNAcb1-4-[HOOC(CH3)CH]-3-O-GlcNAcb-sp4	GN-Mur	473	55	77		336	αKdo-(2→8)-αKdo-(2→4)-αKdo-sp11	A128	192	60	36
503	(GlcNAcb1-4)6-sp4	Ch6	473	243	68		209	αKdo-(2→4)-αKdo-sp11	A58	190	22	15
32	GalN(Gc)b-sp3	bANGc	464	76	22		236	GalNAca1-3(Fuca1-2)Galb-sp5	Atri-C8	190	9	40
507	GalNAca1-3GalNAcb1-3Gala1-4Galb1-4Glcb-sp3	Fs-5	456	188	235		172	Neu5Aca2-6GalNAca-sp3	SiaTn	187	11	43
43	6-O-Su-GlcNAcb-sp3	GN6Su	446	32	21		269	Gal1-3Gal1-4Glc-sp4	Gal3'Lac	186	6	12
493	(GlcNAcb1-4)5b-sp4	Ch5	440	72	42		221	Gala1-3Galb1-4Glcb-sp4	Aa3'Lac-Gly	184	34	22
406	GalNAca1-3(Fuca1-2)Gala1-3GalNAcb-sp3	Atria3AN	432	181	73		87	Galb1-3Galb-sp3	Ab3A	179	28	91
77	Gala1-3GalNAcb-sp3	Tab	427	61	62		135	Galb1-4Glcb-sp4-Asn	Lac-Asn	179	21	19
485	Galb1-4GalNAca1-3(Fuca1-2)Galb1-4GlcNAcb-sp3	Ab4ANa3'(Fa2')LN	424	51	66		100	Galb1-6Galb-sp4	Ab6A	178	74	55
27	3,6-O-Me2-Glcβ-sp3	3,6-Me2Glc	423	67	28		484	GalNAca1-3(Fuca1-2)Galb1-3(Fuca1-4)GlcNAcb-sp3	ALeB	178	57	99
811	3,6-O-Me2-Glcβ1-4(2,3-O-Me2)Rhaβ-O(p-C6H4)-OCH2CH2NH2	KN05097	420	12	93		241	(Glca1-6)3b-sp4	(Ga6)3b	176	32	16
332	Neu5Aca2-3Galb1-4Glcb-sp4-Asn	3’SL-Asn	415	156	107		59	aKdo-5-phosphate-sp11	A173	174	51	25
139	Galb1-4GlcNAca-sp3	LNa	402	58	20		497	Fuca1-2Galb1-4(Fuca1-3)GlcNAcb1-3Galb1-4Glcb-sp4	LeYLac	174	7	6
256	GlcNAcb1-6(GlcNAcb1-4)GalNAca-sp3	GN2-4,6Tn	398	49	24		404	GalNAc1-3Gal1-4(Fuc1-3)GlcNAc-sp3	ANaLeX	172	51	46
2	Gala-sp3	aA	397	43	23		2	Gala-sp3	aA	170	9	21
850	Galb1-3(6-O-Su)GalNAca-sp3	6SuTF	397	91	76		383	Galb1-4GlcNAcb1-3Galb1-4Glcb-sp4	LNnT	170	8	33
254	GlcNAcb1-6(Galb1-3)GalNAca-sp3	core2	388	124	26		805	GalNAcb1-4(6-O-Bn)GlcNAcb-sp3	6'Bn-LacdiNAc	168	14	21
373	Gala1-3Galb1-4GlcNAcb1-3Galb-sp3	Galili4	387	115	61		116	GlcNAcb1-4GlcNAcb-sp3	Ch2	167	38	23
253	GlcNAcb1-6Galb1-4GlcNAcb-sp2	GN6'LN	374	21	29		852	GlcNAcb1-4-[HOOC(CH3)CH]-3-O-GlcNAca-sp4	GN-aMur	166	53	49
287	3-O-Su-Galb1-3(Fucα1-4)GlcNAcb-sp3	3'SuLeA	364	104	43		437	GalNAca1-3(Fuca1-2)Galb1-3GalNAcb-sp3	A(type 4)	164	7	7
632	(GlcAb1-3GlcNAcb1-4)13-NH(p-C6H4)CH2CH2NH2	HyalU13-ol	364	55	74		247	GlcNAcb1-3Galb1-3GalNAca-sp3	GN3'TF	163	16	23
338	Neu5Aca2-6Galb1-3GalNAca-sp3	6'SiaTF	351	12	39		270	Gal1-4Gal1-4Glc-sp4	Gal4'Lac	160	8	36
132	Galb1-3GalNAca-sp5	TF-С8	345	216	67		51	Neu5Acb-sp9	bSia-Bn	158	18	7
5	GalNAca-sp3	Tn	344	36	19		167	GlcNAcb1-4-[HOOC(CH3)CH]-3-O-GlcNAcb-sp4	GN-Mur	158	10	11
87	Galb1-3Galb-sp3	Ab3A	344	97	42		338	Neu5Aca2-6Galb1-3GalNAca-sp3	6'SiaTF	158	14	37
89	Galb1-3GalNAca-sp3	TF	333	109	63		625	(GlcAb1-3GlcNAcb1-4)11-12-NH2-ol	HyalU(11-12)-ol	156	33	8
805	GalNAcb1-4(6-O-Bn)GlcNAcb-sp3	6'Bn-LacdiNAc	328	20	31		853	6-Su-O-Galα1-3GalNAcα-sp3	6'SuTaa	151	19	34
271	Gal1-6Gal1-4Glc-sp4	Gal6'Lac	326	19	119		328	Neu5Aca2-3Galb1-4Glcb-sp4-Phe	3'SL-Phe	150	7	23
103	GalNAca1-3GalNAca-sp3	core5	322	47	25		388	Galb1-4GlcNAcb1-6(Galb1-3)GalNAca-sp3	LNb6TF	148	68	80
116	GlcNAcb1-4GlcNAcb-sp3	Ch2	316	58	21		339	Neu5Acb2-6Galb1-3GalNAca-sp3	6'bSiaTF	142	9	54
105	GalNAcb1-3GalNAcb-sp3	para-Fs	308	22	21		264	Galb1-4Galb1-4GlcNAcb-sp3	Ab4'LN	140	39	19
38	3-O-Su-GalNAcb-sp3	bAN3Su	306	39	53		482	Gala1-3(Fuca1-2)Galb1-3(Fuca1-4)GlcNAcb-sp3	BLeB	140	51	33
491	GalNAca1-3(Fuca1-2)Galb1-4(Fuca1-3)GlcNAcb-sp3	ALeY	288	66	78		479	Fuca1-2Galb1-3GlcNAcb1-3Galb1-4Glcb-sp4	Htype1Lac	138	16	8
852	GlcNAcb1-4-[HOOC(CH3)CH]-3-O-GlcNAca-sp4	GN-aMur	286	90	63		195	6-O-Su-GalNAcb1-4(3-O-Ac)GlcNAcb-sp3	3Ac-LacdiNAc6'Su	137	13	11
201	3,4-O-Su2-GalNAcb1-4GlcNAcb-sp3	LacdiNAc3',4'Su2	268	56	22		402	GalNAca1-3(Fuca1-2)Gala1-4GlcNAcb-sp3	Atria4GN	137	3	11
227	Gala1-3(Fuca1-2)Galb-sp5	Btri-C8	268	6	22		26	Rhab-sp4	bR	130	43	17
183	4,6-O-Su2-Galb1-4GlcNAcb-sp2	LN4'6'Su2-C2	266	50	81		226	Gala1-3(Fuca1-2)Galb-sp3	Btri	130	42	43
146	Galb1-4(6-O-Su)Glcb-sp2	Lac6Su	264	70	38		233	Galb1-3(Fuca1-4)GlcNAcb-sp3	LeA	130	22	16
113	GlcNAcb1-3GalNAca-sp3	core3	263	44	36		196	3-O-Su-GalNAcb1-4(3-O-Su)GlcNAcb-sp3	LacdiNAc3,3'Su2	128	37	20
241	(Glca1-6)3b-sp4	(Ga6)3b	258	98	96		632	(GlcAb1-3GlcNAcb1-4)13-NH(p-C6H4)CH2CH2NH2	HyalU13-ol	128	14	14
196	3-O-Su-GalNAcb1-4(3-O-Su)GlcNAcb-sp3	LacdiNAc3,3'Su2	256	9	52		171	Neu5Aca2-3GalNAca-sp3	3-SiaTn	126	6	3
184	4,6-O-Su2-Galb1-4GlcNAcb-sp3	LN4'6'Su2	254	38	58		272	Neu5Ac2-3Gal1-4Glc-sp4-Cit	3'SL-Cit	126	19	11
484	GalNAca1-3(Fuca1-2)Galb1-3(Fuca1-4)GlcNAcb-sp3	ALeB	248	79	49		327	Neu5Aca2-3Galb1-4Glcb-sp4-Nle	3'SL-Nle	126	10	24
404	GalNAc1-3Gal1-4(Fuc1-3)GlcNAc-sp3	ANaLeX	244	63	58		146	Galb1-4(6-O-Su)Glcb-sp2	Lac6Su	125	9	20
339	Neu5Acb2-6Galb1-3GalNAca-sp3	6'bSiaTF	242	20	29		103	GalNAca1-3GalNAca-sp3	core5	124	16	42
197	3,6-O-Su2-GalNAcb1-4GlcNAcb-sp3	LacdiNAc3',6'Su2	233	12	23		89	Galb1-3GalNAca-sp3	TF	122	16	108
631	(GlcAb1-3GlcNAcb1-4)38-NH(p-C6H4)CH2CH2NH2	HyalU38-ol	233	97	23		248	GlcNAcb1-3Galb1-4Glcb-sp2	GN3'Lac	122	16	2
434	Neu5Aca2-8Neu5Aca2-3Galbl-4Glcb-sp4	GD3	232	82	88		206	Neu5Gca2-3Galβ-sp3	Neu5Gc3A	120	43	24
171	Neu5Aca2-3GalNAca-sp3	3-SiaTn	230	40	31		49	Neu5Aca-sp9	Sia-Bn	119	13	7
189	3,6-O-Su2-Galb1-4(6-O-Su)GlcNAcb-sp2	LN3'66'Su3	230	55	79		392	GalNAca1-3(Fuca1-2)Galb1-3GalNAca-sp3	A(type 3)	119	16	26
26	Rhab-sp4	bR	228	19	46		538	Galb1-4(Fuca1-3)GlcNAcb1-6(Galb1-3GlcNAcb1-3)Galb1-4Glcb-sp4	MFLNH III	119	36	12
202	6-O-Su-GalNAcb1-4(6-O-Su)GlcNAcb-sp3	LacdiNAc6,6'Su2	228	41	10		183	4,6-O-Su2-Galb1-4GlcNAcb-sp2	LN4'6'Su2-C2	118	11	15
125	6-Bn-Galb1-4GlcNAcb-sp2	6'Bn-LN	226	47	79		192	GalNAcb1-4(6-O-Su)GlcNAcb-sp3	LacdiNAc6Su	118	20	25
247	GlcNAcb1-3Galb1-3GalNAca-sp3	GN3'TF	226	49	29		30	Glcb-sp4	bG-Gly	117	14	11
630	(GlcAb1-3GlcNAcb1-4)20-NH(p-C6H4)CH2CH2NH2	HyalU20-ol	226	56	78		223	Gala1-4Galb1-4Glcb-sp2	Pk-C2	117	16	27
237	GalNHa1-3(Fuca1-2)Galb-OCH2CH2CH2NHAc	ABtri	225	13	135		485	Galb1-4GalNAca1-3(Fuca1-2)Galb1-4GlcNAcb-sp3	Ab4ANa3'(Fa2')LN	117	12	14
98	Galb1-4GlcNAcb-sp5	LN-C8	222	27	32		261	Galb1-4(Fucb1-3)GlcNAcb-sp3	bLeX	116	35	36
51	Neu5Acb-sp9	bSia-Bn	220	18	14		61	3-O-Su-GalNAca-sp3	Tn3Su	114	28	32
111	Glcβ1-4Glcβ-sp4	cello	219	70	60		326	Neu5Aca2-3Galb1-4Glcb-sp4-Ile	3'SL-Ile	114	3	21
239	GalNAcb1-3(Fuca1-2)Galb-sp3	Fa2(ANb3)A	216	22	48		386	Galb1-4GlcNAca1-6Galb1-4GlcNAcb-sp2	LNa6'LN	114	16	18
192	GalNAcb1-4(6-O-Su)GlcNAcb-sp3	LacdiNAc6Su	215	0	13		536	Neu5Aa2-3Galb1-3GlcNAcb1-3Galb1-4Glcb-sp4	LSTa	114	8	29
810	GalNGca1-3GalNAca-sp3	core5Gc	214	50	36		18	Manb-sp4	bM	112	25	21
18	Manb-sp4	bM	212	29	34		29	Fucb-sp4	bF	112	29	25
193	3-O-Su-GalNAcb1-4GlcNAcb-sp3	LacdiNAc3'Su	212	40	28		76	Gala1-3Galb-sp3	Bdi	112	35	43
198	4,6-O-Su2-GalNAcb1-4GlcNAcb-sp3	LacdiNAc4',6'Su2	212	40	34		117	GlcNAcb1-4GlcNAcb-sp4	Ch2-Gly	112	15	26
226	Gala1-3(Fuca1-2)Galb-sp3	Btri	212	61	22		143	Fuca1-2(3-O-Su)Galb-sp3	Hdi3Su	112	18	33
386	Galb1-4GlcNAca1-6Galb1-4GlcNAcb-sp2	LNa6'LN	209	53	35		174	Neu5Gca2-6GalNAca-sp3	Neu5GcTn	112	30	21
174	Neu5Gca2-6GalNAca-sp3	Neu5GcTn	205	25	55		219	Fuca1-2Galb1-4Glcb-sp4	Htype6	112	29	14
199	4,6-O-Su2-GalNAcb1-4-(3-O-Ac)GlcNAcb-sp3	3Ac-LacdiNAc4',6'Su2	205	43	38		240	(Glcα1-4)3b-sp4	(Ga4)3b	112	22	17
30	Glcb-sp4	bG-Gly	200	34	44		389	GalNAcb1-3Gala1-4Galb1-4Glcb-sp3	Gb4	112	28	29
261	Galb1-4(Fucb1-3)GlcNAcb-sp3	bLeX	200	50	50		115	GlcNAcb1-4GlcNAcb-Asn	Ch2-Asn	110	5	10
158	4-O-Su-Galb1-4GlcNAcb-sp2	LN4'Su-C2	197	22	18		173	Neu5Acb2-6GalNAca-sp3	bSiaTn	110	5	4
233	Galb1-3(Fuca1-4)GlcNAcb-sp3	LeA	197	23	23		202	6-O-Su-GalNAcb1-4(6-O-Su)GlcNAcb-sp3	LacdiNAc6,6'Su2	110	10	38
22	GlcNAcb-sp4	GN-Gly	194	22	30		176	3-O-Su-Galb1-4(6-O-Su)Glcb-sp2	Lac3',6Su2	108	16	18
809	GalNAcb1-3GalNAca-sp3	ANb3ANa	194	12	59		184	4,6-O-Su2-Galb1-4GlcNAcb-sp3	LN4'6'Su2	108	31	18
106	GalNAcb1-4GlcNAcb-sp3	LacdiNAc	192	10	22		189	3,6-O-Su2-Galb1-4(6-O-Su)GlcNAcb-sp2	LN3'66'Su3	108	32	6
220	Gala1-3Galb1-4Glcb-sp2	Aa3'Lac-C2	192	41	18		229	Galb1-3Galb1-4GlcNAcb-sp4	Ab3'LN-Gly	108	11	62
492	(Glca1-6)5b-sp4	(Ga6)5b	192	34	28		255	GlcNAcb1-6(GlcNAcb1-3)GalNAca-sp3	core4	108	30	27
219	Fuca1-2Galb1-4Glcb-sp4	Htype6	190	16	66		266	Gala1-4Galb1-4GlcNAcb-sp3	P1	108	16	15
165	GlcAb1-3Galb-sp3	GUb3A	188	46	6		371	Fuca1-2Galb1-3(Fuca1-4)GlcNAcb-sp3	LeB	108	16	65
195	6-O-Su-GalNAcb1-4(3-O-Ac)GlcNAcb-sp3	3Ac-LacdiNAc6'Su	187	17	40		92	Galb1-4Glcb-sp2	Lac-C2	106	9	7
334	Neu5Gcα2-3Galβ1-4(6-O-Su)GlcNAcβ-sp3	3'SLN(Gc)6Su	186	10	11		231	Galb1-4GlcNAcb1-3GalNAca-sp3	LN3Tn	106	15	11
363	Gala1-3(Fuca1-2)Galb1-3GalNAcb-sp3	Btype4	186	13	15		260	Galb1-3(Fucb1-4)GlcNAcb-sp3	bLeA	106	20	11
333	Neu5Gcα2-3Galβ1-3(6-O-Su)GlcNAcβ-sp3	3'SiaLeC(Gc)6Su	184	37	33		273	Fucb1-2Galb1-4GlcNAcβ-sp3	Fb2LN	106	12	15
104	GalNAcb1-3Galb-sp3	ANb3A	182	20	24		330	Neu5Aca2-3Galb1-4Glcb-sp4-Val	3'SL-Val	106	9	6
152	3-O-Su-Galb1-4Glcb-sp2	Lac3'Su	182	29	66		334	Neu5Gcα2-3Galβ1-4(6-O-Su)GlcNAcβ-sp3	3'SLN(Gc)6Su	106	40	11
175	Neu5Gcb2-6GalNAca-sp3	bNeu5GcTn	182	68	44		104	GalNAcb1-3Galb-sp3	ANb3A	105	13	86
369	GalNAca1-4(Fuca1-2)Galb1-4GlcNAcb-sp3	ANa4'(Fa2')LN	182	39	122		152	3-O-Su-Galb1-4Glcb-sp2	Lac3'Su	105	3	55
372	Fuca1-2Galb1-4(Fuca1-3)GlcNAcb-sp3	LeY	182	54	54		197	3,6-O-Su2-GalNAcb1-4GlcNAcb-sp3	LacdiNAc3',6'Su2	105	7	4
389	GalNAcb1-3Gala1-4Galb1-4Glcb-sp3	Gb4	182	48	193		296	Neu5Aca2-6Galb1-4Glcb-sp4	6'SL-Gly	105	13	7
37	3-O-Su-Galb-sp3	bA3Su	179	37	22		300	Neu5Aca2-6Galb1-4GlcNAcb-sp3	6'SLN	105	28	13
543	Fuca1-2Galb1-3(Fuca1-4)GlcNAcb1-3[Galb1-4(Fuca1-3)GlcNAcb1-6]Galb1-4Glcb-sp4	TFLNH	179	19	23		379	Galb1-3GlcNAcb1-3Galb1-4GlcNAcb-sp3	LeCb3'LN	105	24	21
190	Galb1-4-(6-P)GlcNAcb-sp2	LN6P	178	38	36		216	Fuca1-2Galb1-4GlcNAcb-sp3	Htype2	104	2	5
813	Galβ1-3GalNGcα-sp3	TFGc	178	17	19		294	Neu5Aca2-3Galb1-4Glcb-sp4	3'SL-Gly	104	18	34
56	Gala-sp7	aA-Ph	176	14	196		96	Galb1-4GlcNAcb-sp2	LN-C2	103	3	2
210	L,D-Hep-(1→5)-αKdo-4-phosphate-sp11	JN	176	34	3		165	GlcAb1-3Galb-sp3	GUb3A	103	16	6
214	DGlcAb1-3Galb-sp3	deltaGUb3A	176	32	44		168	GlcNAcb1-4Mur-L-Ala-D-i-Gln-Lys	GMDPLys	103	13	2
436	4-O-Su-Neu5Aca2-3Galb1-4(Fuca1-3)(6-O-Su)GlcNAcb-sp3	SiaLeX6,4''Su2	176	42	32		169	Neu5Aca2-3Galb-sp3	GM4	103	2	6
531	Neu5Aca2-8Neu5Aca2-3(GalNAcb1-4)Galb1-4Glcb-sp2	GD2	176	48	22		198	4,6-O-Su2-GalNAcb1-4GlcNAcb-sp3	LacdiNAc4',6'Su2	103	7	10
117	GlcNAcb1-4GlcNAcb-sp4	Ch2-Gly	174	0	34		207	Neu5Acb2-6GalNAcb-sp3	bSiaANb	103	14	14
143	Fuca1-2(3-O-Su)Galb-sp3	Hdi3Su	174	23	4		292	Neu5Aca2-3Galb1-3GalNAca-sp3	Sia3'TF	103	23	6
159	4-O-Su-Galb1-4GlcNAcb-sp3	LN4'Su	174	33	26		537	Neu5Aa2-3Galb1-4GlcNAcb1-3Galb1-4Glcb-sp4	LSTd	103	21	14
206	Neu5Gca2-3Galβ-sp3	Neu5Gc3A	174	43	32		205	Neu5Aca2-6GalNAcb-sp3	6SiaANb	102	11	22
255	GlcNAcb1-6(GlcNAcb1-3)GalNAca-sp3	core4	174	18	16		182	3,6-O-Su2-Galb1-4GlcNAcb-sp2	LN3'6'Su2	101	4	7
482	Gala1-3(Fuca1-2)Galb1-3(Fuca1-4)GlcNAcb-sp3	BLeB	174	5	28		237	GalNHa1-3(Fuca1-2)Galb-OCH2CH2CH2NHAc	ABtri	101	4	17
502	(Glca1-6)6b-sp4	(Ga6)6b	174	15	66		199	4,6-O-Su2-GalNAcb1-4-(3-O-Ac)GlcNAcb-sp3	3Ac-LacdiNAc4',6'Su2	100	25	12
110	Glca1-4Glcb-sp3	Malt2	172	3	10		203	Galb1-4(6-O-Su)GlcNAcb-sp2	LN6Su	100	17	27
203	Galb1-4(6-O-Su)GlcNAcb-sp2	LN6Su	172	18	46		222	Gala1-3Galb1-4GlcNAcb-sp3	Galili3	100	17	22
182	3,6-O-Su2-Galb1-4GlcNAcb-sp2	LN3'6'Su2	171	81	91		368	GalNAca1-3(Fuca1-2)Galb1-4GlcNAcb-sp3	Atype2	100	14	29
315	Neu5Aca2-3Galb1-4-(6-O-Su)GlcNAcb-sp3	3'SLN6Su	171	42	69		374	Gala1-3(Gala1-4)Galb1-4GlcNAcb-sp3	Aa2-3',4'LN	100	21	23
388	Galb1-4GlcNAcb1-6(Galb1-3)GalNAca-sp3	LNb6TF	169	13	86		502	(Glca1-6)6b-sp4	(Ga6)6b	100	44	20
405	Gala1-3(Fuca1-2)Gala1-4GlcNAcb-sp3	Btria4GN	169	76	110		15	HOCH2(HOCH)4CH2NH2	glucitol	98	19	30
29	Fucb-sp4	bF	168	41	36		22	GlcNAcb-sp4	GN-Gly	98	10	7
162	6-O-Su-Galb1-4GlcNAcb-sp2	LN6'Su-C2	168	30	45		111	Glcβ1-4Glcβ-sp4	cello	98	18	15
180	6-O-Su-Galb1-4(6-O-Su)GlcNAcb-sp2	LN66'Su2	168	22	20		158	4-O-Su-Galb1-4GlcNAcb-sp2	LN4'Su-C2	98	8	11
379	Galb1-3GlcNAcb1-3Galb1-4GlcNAcb-sp3	LeCb3'LN	168	20	39		201	3,4-O-Su2-GalNAcb1-4GlcNAcb-sp3	LacdiNAc3',4'Su2	98	22	26
28	Xylb-sp4	bXyl	166	19	12		214	DGlcAb1-3Galb-sp3	deltaGUb3A	98	14	14
150	3-O-Su-Galb1-3GalNAca-sp3	TF3'Su	166	22	22		370	GalNAcb1-3(Fuca1-2)Galb1-4GlcNAcb-sp3	ANb3'(Fa2')LN	98	33	20
302	Neu5Acb2-6Galb1-4GlcNAcb-sp3	b6'SLN	166	59	60		809	GalNAcb1-3GalNAca-sp3	ANb3ANa	98	16	30
428	Neu5Aca2-3Galb1-4(Fuca1-3)(6-O-Su)GlcNAcb-sp3	SiaLeX6Su	166	34	14		46	6-H2PO3Glcb-sp4	G6P	96	22	8
435	Neu5Aca2-3Galb1-4(2-O-Su-Fuca1-3)(6-O-Su)GlcNAcb-sp3	SiaLeX6,2'''Su2	166	23	19		98	Galb1-4GlcNAcb-sp5	LN-C8	96	16	16
177	3-O-Su-Galb1-4(6-O-Su)GlcNAcb-sp3	LN3'6Su2	165	31	52		106	GalNAcb1-4GlcNAcb-sp3	LacdiNAc	96	14	7
483	Gala1-3(Fuca1-2)Galb1-4(Fuca1-3)GlcNAcb-sp3	BLeY	165	30	32		114	GlcNAcb1-3Manb-sp4	GN3M	96	12	8
100	Galb1-6Galb-sp4	Ab6A	164	34	105		150	3-O-Su-Galb1-3GalNAca-sp3	TF3'Su	96	6	8
320	4-O-Su-Neu5Aca2-3(6-O-Su)Galb1-4GlcNAcb-sp3	3'SLN6',4''Su2	164	39	34		162	6-O-Su-Galb1-4GlcNAcb-sp2	LN6'Su-C2	96	7	7
390	(Glca1-4)4b-sp4	(Ga4)4b	164	37	14		217	Fuca1-2Galb1-3GalNAca-sp3	Htype3	96	20	11
362	Gala1-3(Fuca1-2)Galb1-3GalNAca-sp3	Btype3	163	15	22		225	Gala1-4Galb1-4GlcNAcb-sp2	P1	96	0	10
45	GlcAb-sp3	bGU	162	11	31		232	Galb1-4GlcNAcb1-6GalNAca-sp3	LN6Tn	96	9	22
169	Neu5Aca2-3Galb-sp3	GM4	162	26	40		295	Neu5Aca2-6Galb1-4Glcb-sp2	6'SL-C2	96	10	10
212	D-glycero-α-D-talo-octulosonic acid (Ko)-(2→4)-αKdo-sp11	NW61S	162	19	21		483	Gala1-3(Fuca1-2)Galb1-4(Fuca1-3)GlcNAcb-sp3	BLeY	96	12	7
187	Neu5Aca2-8Neu5Aca2-sp9	(Sia)2Bn	161	39	47		531	Neu5Aca2-8Neu5Aca2-3(GalNAcb1-4)Galb1-4Glcb-sp2	GD2	96	9	20
229	Galb1-3Galb1-4GlcNAcb-sp4	Ab3'LN-Gly	161	51	82		16	Mana-sp3	aM	94	12	8
260	Galb1-3(Fucb1-4)GlcNAcb-sp3	bLeA	161	38	43		21	Galb-sp4	bA-Gly	94	10	9
535	Neu5Aca2-8Neu5Aca2-3(GalNAcb1-4)Galb1-4Glcβ-sp4	GD2-Gly	161	23	39		37	3-O-Su-Galb-sp3	bA3Su	94	16	49
337	GalNAc1-4Gal1-4GlcNAc-sp3	ANa4'LN	160	28	11		187	Neu5Aca2-8Neu5Aca2-sp9	(Sia)2Bn	94	13	9
114	GlcNAcb1-3Manb-sp4	GN3M	158	9	17		193	3-O-Su-GalNAcb1-4GlcNAcb-sp3	LacdiNAc3'Su	94	7	10
335	Neu5Acα2-3Galβ1-3(6-O-Su)GlcNAcβ-sp3	3'SiaLeC6Su	158	35	27		297	Neu5Acb2-6Galb1-4Glcb-sp2	b6'SL	94	12	39
1	Fuca-sp3	aF	156	34	7		384	Galb1-4GlcNAcb1-3Galb1-4GlcNAcb-sp2	LNb3'LN-C2	94	26	30
49	Neu5Aca-sp9	Sia-Bn	156	22	41		629	Trehalose-ethanolamine	Treh	94	20	23
58	Fucβ-sp3	bF	156	12	23		630	(GlcAb1-3GlcNAcb1-4)20-NH(p-C6H4)CH2CH2NH2	HyalU20-ol	94	10	2
59	aKdo-5-phosphate-sp11	A173	156	26	110		289	Neu5Aca2-6(Galb1-3)GalNAca-sp3	6SiaTF	93	11	3
205	Neu5Aca2-6GalNAcb-sp3	6SiaANb	156	30	39		28	Xylb-sp4	bXyl	92	4	14
216	Fuca1-2Galb1-4GlcNAcb-sp3	Htype2	156	36	40		58	Fucβ-sp3	bF	92	5	14
248	GlcNAcb1-3Galb1-4Glcb-sp2	GN3'Lac	156	18	47		62	GlcAβ-sp2	bGN-C2	92	10	16
539	Galb1-4GlcNAcb1-6(Fuca1-2Galb1-3GlcNAcb1-3)Galb1-4Glcb-sp4	MFLNH I	156	41	56		97	Galb1-4GlcNAcb-sp3	LN	92	18	17
94	Galb1-4Galb-sp4	Ab4A	155	11	20		99	Galb1-4GlcNAcb-sp8	LN-PEG	92	9	11
21	Galb-sp4	bA-Gly	154	14	43		190	Galb1-4-(6-P)GlcNAcb-sp2	LN6P	92	24	22
44	GlcAa-sp3	aGU	154	58	12		212	D-glycero-α-D-talo-octulosonic acid (Ko)-(2→4)-αKdo-sp11	NW61S	92	16	25
99	Galb1-4GlcNAcb-sp8	LN-PEG	154	16	42		249	GlcNAcb1-3Galb1-4GlcNAcb-sp2	GN3'LN-C2	92	12	12
232	Galb1-4GlcNAcb1-6GalNAca-sp3	LN6Tn	154	14	4		250	GlcNAcb1-3Galb1-4GlcNAcb-sp3	GN3'LN	92	9	21
541	Galb1-4(Fuca1-3)GlcNAcb1-6(Fuca1-2Galb1-3GlcNAcb1-3)Galb1-4Glcb-sp4	DFLNH (a)	154	37	10		360	Gala1-3(Fuca1-2)Galb1-4GlcNAcb-sp3	Btype2	92	28	27
851	Gala1-3(6-O-Su)GalNAca-sp3	6SuTaa	154	6	28		420	4-O-SuGalb1-4GlcNAcb1-3Galb1-4GlcNAcb-sp3	(4'SuLN)3'LN	92	12	4
231	Galb1-4GlcNAcb1-3GalNAca-sp3	LN3Tn	153	23	16		813	Galβ1-3GalNGcα-sp3	TFGc	92	13	9
23	GalNAcb-sp4	bAN-Gly	152	35	45		47	6-H2PO3Mana-sp3	M6P	91	0	4
490	Galb1-4GlcNAcb1-6(GlcNAcb1-3)Galb1-4GlcNAcb-sp2	LN6'(GN3')LN	152	50	76		153	6-O-Su-Galb1-4Glcb-sp2	Lac6'Su	91	7	7
115	GlcNAcb1-4GlcNAcb-Asn	Ch2-Asn	151	12	46		210	L,D-Hep-(1→5)-αKdo-4-phosphate-sp11	JN	91	10	21
217	Fuca1-2Galb1-3GalNAca-sp3	Htype3	151	18	28		277	GalN(Gc)a1-3(Fuca1-2)Galb-sp3	NGcAtri	91	10	14
538	Galb1-4(Fuca1-3)GlcNAcb1-6(Galb1-3GlcNAcb1-3)Galb1-4Glcb-sp4	MFLNH III	151	22	37		302	Neu5Acb2-6Galb1-4GlcNAcb-sp3	b6'SLN	91	1	42
46	6-H2PO3Glcb-sp4	G6P	150	11	19		308	KDNa2-3Galb1-4GlcNAcb-sp2	KDN3'LN	91	40	27
204	4-O-Su-GalNAcb1-4GlcNAcb-sp2	LacdiNAc4'Su-C2	150	10	26		78	Gala1-3GalNAca-sp3	Taa	90	11	10
364	Gala1-3Galb1-4(Fuca1-3)GlcNAcb-sp3	aGalLeX	150	43	44		178	6-O-Su-Galb1-4(6-O-Su)Glcb-sp2	Lac6,6'Su2	90	12	21
371	Fuca1-2Galb1-3(Fuca1-4)GlcNAcb-sp3	LeB	150	24	34		325	Neu5Aca2-3Galb1-4Glcb-sp4-Ala	3'SL-Ala	90	26	14
431	Neu5Aca2-3Galb1-4(2-O-Su-Fuca1-3)GlcNAcb-sp3	SiaLeX2'''Su	150	2	34		332	Neu5Aca2-3Galb1-4Glcb-sp4-Asn	3’SL-Asn	90	10	40
480	Fuca1-2Galb1-3GlcNAcb1-3Galb1-4GlcNAcb-sp2	Htype1LN	150	13	3		527	Neu5Aca2-3Galb1-4GlcNAcb1-3Galb1-4GlcNAcb-sp2	3'SLN-LN	90	37	24
812	Galβ1-4Glcα-sp4	Laca	150	22	19		810	GalNGca1-3GalNAca-sp3	core5Gc	90	14	6
119	Manα1-2Manb-sp4	Ma2Mb	148	37	15		851	Gala1-3(6-O-Su)GalNAca-sp3	6SuTaa	90	28	34
120	Manα1-3Manb-sp4	Ma3M	148	15	4		122	Mana1-6Manb-sp4	Ma6M	89	6	6
153	6-O-Su-Galb1-4Glcb-sp2	Lac6'Su	148	4	8		191	6-P-Galb1-4GlcNAcb-sp2	LN6'P	89	20	18
170	Neu5Aca2-6Galb-sp3	Sia6A	148	20	32		213	Neu5Acb2-6Galb-sp3	6bSiaA	89	17	14
292	Neu5Aca2-3Galb1-3GalNAca-sp3	Sia3'TF	148	28	173		291	Neu5Acb2-6(Galb1-3)GalNAca-sp3	b6SiaTF	89	7	14
78	Gala1-3GalNAca-sp3	Taa	146	10	144		333	Neu5Gcα2-3Galβ1-3(6-O-Su)GlcNAcβ-sp3	3'SiaLeC(Gc)6Su	89	6	6
181	3,4-O-Su2-Galb1-4GlcNAcb-sp3	LN3'4'Su2	146	7	45		369	GalNAca1-4(Fuca1-2)Galb1-4GlcNAcb-sp3	ANa4'(Fa2')LN	89	25	33
194	6-O-Su-GalNAcb1-4GlcNAcb-sp3	LacdiNAc6'Su	146	20	6		436	4-O-Su-Neu5Aca2-3Galb1-4(Fuca1-3)(6-O-Su)GlcNAcb-sp3	SiaLeX6,4''Su2	89	27	28
300	Neu5Aca2-6Galb1-4GlcNAcb-sp3	6'SLN	146	22	6		492	(Glca1-6)5b-sp4	(Ga6)5b	89	2	18
370	GalNAcb1-3(Fuca1-2)Galb1-4GlcNAcb-sp3	ANb3'(Fa2')LN	146	27	27		1	Fuca-sp3	aF	87	7	7
166	GlcAb1-6Galb-sp3	GUb6A	145	33	30		94	Galb1-4Galb-sp4	Ab4A	87	18	24
31	L-Araa-sp4	aAra	144	28	34		177	3-O-Su-Galb1-4(6-O-Su)GlcNAcb-sp3	LN3'6Su2	87	18	18
173	Neu5Acb2-6GalNAca-sp3	bSiaTn	144	25	4		204	4-O-Su-GalNAcb1-4GlcNAcb-sp2	LacdiNAc4'Su-C2	87	17	13
259	Galb1-4(Galb1-3)GlcNAcb-sp3	(Ab)2-3,4GN	144	12	12		259	Galb1-4(Galb1-3)GlcNAcb-sp3	(Ab)2-3,4GN	87	7	13
360	Gala1-3(Fuca1-2)Galb1-4GlcNAcb-sp3	Btype2	143	13	44		275	GalNAcb1-3Galb1-4GlcNAcβ-sp3	ANb3'LN	87	1	7
540	Galb1-4(Fuca1-3)GlcNAcb1-6(Neu5Acα2-6Galb1-4GlcNAcb1-3)Galb1-4Glcb-sp4	MSMFLNnH	143	28	5		631	(GlcAb1-3GlcNAcb1-4)38-NH(p-C6H4)CH2CH2NH2	HyalU38-ol	87	9	11
96	Galb1-4GlcNAcb-sp2	LN-C2	142	32	26		14	GlcN(Gc)b-sp4	bGN(Gc)	86	8	4
15	HOCH2(HOCH)4CH2NH2	glucitol	140	2	56		45	GlcAb-sp3	bGU	86	4	30
61	3-O-Su-GalNAca-sp3	Tn3Su	140	23	6		107	GalNAcb1-4GlcNAcb-sp2	LacdiNAc-C2	86	8	5
176	3-O-Su-Galb1-4(6-O-Su)Glcb-sp2	Lac3',6Su2	140	13	19		188	Neu5Aca2-8Neu5Acb-sp9	(Sia)2-bBn	86	6	4
225	Gala1-4Galb1-4GlcNAcb-sp2	P1	140	23	20		335	Neu5Acα2-3Galβ1-3(6-O-Su)GlcNAcβ-sp3	3'SiaLeC6Su	86	25	23
234	Galb1-4(Fuca1-3)GlcNAcb-sp3	LeX	140	29	15		434	Neu5Aca2-8Neu5Aca2-3Galbl-4Glcb-sp4	GD3	86	11	9
291	Neu5Acb2-6(Galb1-3)GalNAca-sp3	b6SiaTF	140	7	12		31	L-Araa-sp4	aAra	84	16	18
403	Galb1-3GlcNAcb1-3Galb1-4GlcNAcb-sp2	LeC3'LN	140	15	10		50	Neu5Acb-sp3	bSia	84	9	14
47	6-H2PO3Mana-sp3	M6P	138	21	5		119	Manα1-2Manb-sp4	Ma2Mb	84	10	18
168	GlcNAcb1-4Mur-L-Ala-D-i-Gln-Lys	GMDPLys	138	19	20		175	Neu5Gcb2-6GalNAca-sp3	bNeu5GcTn	84	16	42
207	Neu5Acb2-6GalNAcb-sp3	bSiaANb	138	33	64		180	6-O-Su-Galb1-4(6-O-Su)GlcNAcb-sp2	LN66'Su2	84	16	20
297	Neu5Acb2-6Galb1-4Glcb-sp2	b6'SL	138	28	31		315	Neu5Aca2-3Galb1-4-(6-O-Su)GlcNAcb-sp3	3'SLN6Su	84	15	14
308	KDNa2-3Galb1-4GlcNAcb-sp2	KDN3'LN	138	51	67		337	GalNAc1-4Gal1-4GlcNAc-sp3	ANa4'LN	84	18	21
258	Mana1-6(Mana1-3)Manb-sp4	(Ma)3b	137	11	11		365	Gala1-4(Fuca1-2)Galb1-4GlcNAcb-sp3	Aa4'(Fa2')LN	84	19	31
264	Galb1-4Galb1-4GlcNAcb-sp3	Ab4'LN	137	8	10		372	Fuca1-2Galb1-4(Fuca1-3)GlcNAcb-sp3	LeY	84	18	12
249	GlcNAcb1-3Galb1-4GlcNAcb-sp2	GN3'LN-C2	136	10	12		405	Gala1-3(Fuca1-2)Gala1-4GlcNAcb-sp3	Btria4GN	84	2	38
342	Neu5Acα2-3(6-O-Su)Galβ1-3GalNAcα-sp3	6'Su3'SiaTF	136	19	25		428	Neu5Aca2-3Galb1-4(Fuca1-3)(6-O-Su)GlcNAcb-sp3	SiaLeX6Su	84	12	16
365	Gala1-4(Fuca1-2)Galb1-4GlcNAcb-sp3	Aa4'(Fa2')LN	136	12	19		491	GalNAca1-3(Fuca1-2)Galb1-4(Fuca1-3)GlcNAcb-sp3	ALeY	84	18	26
814	Manα1-6Manα-sp4	Ma6Ma	136	34	18		495	Mana1-6(Mana1-3)Mana1-6(Mana1-3)Manb-sp4	(Ma)5b	84	13	10
53	Neu5Gcb-sp3	bSia5Gc	134	15	20		498	Galb1-4GlcNAcb1-3Galb1-4GlcNAcb1-3Galb1-4GlcNAcb-sp3	(LNb3')3	84	5	6
57	D-Ribβ -sp4	bRib	133	7	15		528	Neu5Aca2-3Galb1-4(Fuca1-3)GlcNAcb1-3Galb-sp3	SiaLeX3A	84	16	20
275	GalNAcb1-3Galb1-4GlcNAcβ-sp3	ANb3'LN	133	11	15		535	Neu5Aca2-8Neu5Aca2-3(GalNAcb1-4)Galb1-4Glcβ-sp4	GD2-Gly	84	22	11
316	Fuca1-2(6-O-Su)Galb1-4GlcNAcb-sp3	6'SuHtype2	133	19	77		7	Glca-sp3	aG	82	10	16
384	Galb1-4GlcNAcb1-3Galb1-4GlcNAcb-sp2	LNb3'LN-C2	133	29	57		120	Manα1-3Manb-sp4	Ma3M	82	8	16
433	Neu5Aca2-6(Neu5Aca2-3Galb1-3)GalNAca-sp3	Sia2-3',6TF	133	5	19		220	Gala1-3Galb1-4Glcb-sp2	Aa3'Lac-C2	82	7	28
498	Galb1-4GlcNAcb1-3Galb1-4GlcNAcb1-3Galb1-4GlcNAcb-sp3	(LNb3')3	133	16	16		258	Mana1-6(Mana1-3)Manb-sp4	(Ma)3b	82	17	14
629	Trehalose-ethanolamine	Treh	133	14	29		298	Neu5Aca2-3Galb1-4GlcNAcb-sp3	3'SLN	82	18	5
76	Gala1-3Galb-sp3	Bdi	132	18	84		303	Neu5Gca2-3Galb1-4GlcNAcb-sp3	3'SLN(Gc)	82	12	8
121	Manα1-4Manb-sp4	Ma4M	132	18	16		310	Neu5Aca2-3Galb1-4GlcNAcb-O(CH2)3NH-amide-Neu5Aca2-3Galb1-4GlcNAcb-sp3	(3'SLN)2	82	25	39
122	Mana1-6Manb-sp4	Ma6M	132	12	10		363	Gala1-3(Fuca1-2)Galb1-3GalNAcb-sp3	Btype4	82	8	16
213	Neu5Acb2-6Galb-sp3	6bSiaA	132	13	8		490	Galb1-4GlcNAcb1-6(GlcNAcb1-3)Galb1-4GlcNAcb-sp2	LN6'(GN3')LN	82	18	22
374	Gala1-3(Gala1-4)Galb1-4GlcNAcb-sp3	Aa2-3',4'LN	132	29	26		539	Galb1-4GlcNAcb1-6(Fuca1-2Galb1-3GlcNAcb1-3)Galb1-4Glcb-sp4	MFLNH I	82	23	30
107	GalNAcb1-4GlcNAcb-sp2	LacdiNAc-C2	130	9	24		293	Neu5Aca2-3Galb1-4Glcb-sp3	3'SL	81	3	25
186	Neu5Aca2-8Neu5Aca2-sp3	(Sia)2	130	18	18		44	GlcAa-sp3	aGU	80	14	10
298	Neu5Aca2-3Galb1-4GlcNAcb-sp3	3'SLN	130	27	66		57	D-Ribβ -sp4	bRib	80	18	18
420	4-O-SuGalb1-4GlcNAcb1-3Galb1-4GlcNAcb-sp3	(4'SuLN)3'LN	130	29	48		156	3-O-Su-Galb1-4GlcNAcb-sp2	LN3'Su-C2	80	6	16
425	Neu5Aca2-3Galb1-4(Fucb1-3)GlcNAcb-sp3	bF-SiaLeX	130	22	34		159	4-O-Su-Galb1-4GlcNAcb-sp3	LN4'Su	80	7	18
488	Galb1-4GlcNAcb1-6(Galb1-4GlcNAcb1-3)GalNAca-sp3	LN2-3,6Tn	130	6	24		170	Neu5Aca2-6Galb-sp3	Sia6A	80	23	6
495	Mana1-6(Mana1-3)Mana1-6(Mana1-3)Manb-sp4	(Ma)5b	130	12	29		234	Galb1-4(Fuca1-3)GlcNAcb-sp3	LeX	80	16	6
156	3-O-Su-Galb1-4GlcNAcb-sp2	LN3'Su-C2	128	26	56		306	9-NAc-Neu5Aca2-6Galb1-4GlcNAcb-sp3	9NAc-6'SLN	80	6	22
222	Gala1-3Galb1-4GlcNAcb-sp3	Galili3	128	14	18		319	Neu5Aca2-3(6-O-Su)Galb1-4GlcNAcb-sp3	3'SLN6'Su	80	26	23
321	(Neu5Aca2-8)3-sp3	(Sia)3	128	20	73		361	Gala1-3(Fuca1-2)Galb1-4GlcNAcb-sp2	Btype2-C2	80	10	12
432	Neu5Aca2-3Galb1-4(3-O-Su-Fuca1-3)GlcNAcβ-sp3	SiaLeX3'''Su	128	8	11		362	Gala1-3(Fuca1-2)Galb1-3GalNAca-sp3	Btype3	80	10	19
489	Galb1-4GlcNAcb1-3(GlcNAcb1-6)Galb1-4GlcNAcb-sp2	LN3'(GN6')LN	128	30	25		431	Neu5Aca2-3Galb1-4(2-O-Su-Fuca1-3)GlcNAcb-sp3	SiaLeX2'''Su	80	6	2
530	(Neu5Aca2-3Galb1)2-3,4-GlcNAcb-sp3	(Sia3A)2-3,4GN	128	26	64		480	Fuca1-2Galb1-3GlcNAcb1-3Galb1-4GlcNAcb-sp2	Htype1LN	80	2	12
804	[Galb1-4GlcNAcb-OCH2CH2]2NH	LN_dimer	128	27	73		508	GalNAcb1-3(Fuc1-2)Gal1-4(Fuc1-3)GlcNAc-sp3	ALeYb	80	26	22
188	Neu5Aca2-8Neu5Acb-sp9	(Sia)2-bBn	127	3	11		23	GalNAcb-sp4	bAN-Gly	79	5	17
250	GlcNAcb1-3Galb1-4GlcNAcb-sp3	GN3'LN	127	13	13		110	Glca1-4Glcb-sp3	Malt2	79	5	54
273	Fucb1-2Galb1-4GlcNAcβ-sp3	Fb2LN	126	16	24		268	GlсNAcb1-4(Fuca1-6)GlcNAcb-sp3	Fa6Ch2	79	12	13
319	Neu5Aca2-3(6-O-Su)Galb1-4GlcNAcb-sp3	3'SLN6'Su	126	12	34		425	Neu5Aca2-3Galb1-4(Fucb1-3)GlcNAcb-sp3	bF-SiaLeX	79	10	7
361	Gala1-3(Fuca1-2)Galb1-4GlcNAcb-sp2	Btype2-C2	126	15	21		505	(GNβ1-2Mα1)2-3,6-Mβ1-4GNβ1-4GNβ-sp4	7-OS	79	19	14
395	GlcNAcb1-6(GlcNAcb1-3)Galb1-4GlcNAcb-sp2	Tk	126	28	42		186	Neu5Aca2-8Neu5Aca2-sp3	(Sia)2	78	9	8
505	(GNβ1-2Mα1)2-3,6-Mβ1-4GNβ1-4GNβ-sp4	7-OS	125	21	29		200	4-O-Su-GalNAcb1-4GlcNAcb-sp3	LacdiNAc4'Su	78	8	17
92	Galb1-4Glcb-sp2	Lac-C2	123	48	32		320	4-O-Su-Neu5Aca2-3(6-O-Su)Galb1-4GlcNAcb-sp3	3'SLN6',4''Su2	78	14	10
200	4-O-Su-GalNAcb1-4GlcNAcb-sp3	LacdiNAc4'Su	123	21	36		364	Gala1-3Galb1-4(Fuca1-3)GlcNAcb-sp3	aGalLeX	78	20	27
296	Neu5Aca2-6Galb1-4Glcb-sp4	6'SL-Gly	123	17	4		390	(Glca1-4)4b-sp4	(Ga4)4b	78	24	10
303	Neu5Gca2-3Galb1-4GlcNAcb-sp3	3'SLN(Gc)	123	13	13		433	Neu5Aca2-6(Neu5Aca2-3Galb1-3)GalNAca-sp3	Sia2-3',6TF	78	17	9
426	Neu5Aca2-3Galb1-3(Fuca1-4)GlcNAcb-sp3	SiaLeA	123	7	32		442	Neu5Aca2-3(GalNAcb1-4)Galb1-4Glcb-sp4	GM2	78	6	18
240	(Glcα1-4)3b-sp4	(Ga4)3b	122	8	47		488	Galb1-4GlcNAcb1-6(Galb1-4GlcNAcb1-3)GalNAca-sp3	LN2-3,6Tn	78	6	8
341	Neu5Aca2-3-(6-O-Su)Galb1-4GlcNAcb-sp2	6'Su3'SLN	122	10	42		489	Galb1-4GlcNAcb1-3(GlcNAcb1-6)Galb1-4GlcNAcb-sp2	LN3'(GN6')LN	78	8	3
14	GlcN(Gc)b-sp4	bGN(Gc)	120	26	34		499	Galb1-4GlcNAcb1-6(Galb1-4GlcNAcb1-3)Galb1-4GlcNAcb-sp2	LN2-3',6'LN	78	16	21
50	Neu5Acb-sp3	bSia	120	6	22		812	Galβ1-4Glcα-sp4	Laca	78	4	20
62	GlcAβ-sp2	bGN-C2	120	12	7		166	GlcAb1-6Galb-sp3	GUb6A	76	10	16
223	Gala1-4Galb1-4Glcb-sp2	Pk-C2	120	17	51		181	3,4-O-Su2-Galb1-4GlcNAcb-sp3	LN3'4'Su2	76	3	9
288	3-O-Su-Galb1-4(Fuca1-3)GlcNAcb-sp3	3'SuLeX	120	17	17		194	6-O-Su-GalNAcb1-4GlcNAcb-sp3	LacdiNAc6'Su	76	12	14
295	Neu5Aca2-6Galb1-4Glcb-sp2	6'SL-C2	120	10	22		305	Neu5Gcb2-6Galb1-4GlcNAcb-sp3	b6'SLN(Gc)	76	7	5
419	3-O-SuGalb1-4GlcNAcb1-3Galb1-4GlcNAcb-sp3	(3'SuLN)3'LN	120	6	30		395	GlcNAcb1-6(GlcNAcb1-3)Galb1-4GlcNAcb-sp2	Tk	76	7	33
438	Fuc1-2Gal1-4(Fuc1-3)GlcNAc-sp3	LeYbF	120	23	23		396	(GlcNAcb1)3-3,4,6-GalNAca-sp3	GN3-3,4,6Tn	76	16	50
508	GalNAcb1-3(Fuc1-2)Gal1-4(Fuc1-3)GlcNAc-sp3	ALeYb	120	14	2		403	Galb1-3GlcNAcb1-3Galb1-4GlcNAcb-sp2	LeC3'LN	76	19	14
627	(Siaα2-6Aβ1-4GNβ1-2Mα1)2-3,6-Mβ1-4GNβ1-4GNβ-sp4	11-OS	120	11	8		419	3-O-SuGalb1-4GlcNAcb1-3Galb1-4GlcNAcb-sp3	(3'SuLN)3'LN	76	16	11
123	Manβ1-4GlcNAcb-sp4	Mb4GN	118	37	28		627	(Siaα2-6Aβ1-4GNβ1-2Mα1)2-3,6-Mβ1-4GNβ1-4GNβ-sp4	11-OS	76	13	9
289	Neu5Aca2-6(Galb1-3)GalNAca-sp3	6SiaTF	118	17	15		814	Manα1-6Manα-sp4	Ma6Ma	76	12	14
290	Neu5Aca2-6(Gala1-3)GalNAca-sp3	A3a(Sia)Tn	118	24	19		318	Neu5Aca2-6Galb1-4(6-O-Su)GlcNAcb-sp3	6'SLN6Su	75	26	28
178	6-O-Su-Galb1-4(6-O-Su)Glcb-sp2	Lac6,6'Su2	116	26	55		387	Galb1-4GlcNAcb1-6Galb1-4GlcNAcb-sp2	LNb6'LN	75	19	23
499	Galb1-4GlcNAcb1-6(Galb1-4GlcNAcb1-3)Galb1-4GlcNAcb-sp2	LN2-3',6'LN	116	20	18		394	GlcNAcb1-4(GlcNAcb1-3)Galb1-4GlcNAcb-sp2	GN2-3',4'LN	75	14	11
191	6-P-Galb1-4GlcNAcb-sp2	LN6'P	115	37	45		540	Galb1-4(Fuca1-3)GlcNAcb1-6(Neu5Acα2-6Galb1-4GlcNAcb1-3)Galb1-4Glcb-sp4	MSMFLNnH	75	17	11
304	Neu5Gca2-6Galb1-4GlcNAcb-sp3	6'SLN(Gc)	115	23	19		9	Glcb-sp3	bG	73	8	15
305	Neu5Gcb2-6Galb1-4GlcNAcb-sp3	b6'SLN(Gc)	115	12	15		52	Neu5Gca-sp3	aNeu5Gc	73	8	12
310	Neu5Aca2-3Galb1-4GlcNAcb-O(CH2)3NH-amide-Neu5Aca2-3Galb1-4GlcNAcb-sp3	(3'SLN)2	115	21	117		53	Neu5Gcb-sp3	bSia5Gc	73	4	7
322	(Neu5Aca2-8)3b-sp3	(Sia)3b	115	15	12		804	[Galb1-4GlcNAcb-OCH2CH2]2NH	LN_dimer	73	13	26
340	Gala1-3(Neu5Acb2-6)GalNAcb-sp3	b6SiaTab	115	39	27		340	Gala1-3(Neu5Acb2-6)GalNAcb-sp3	b6SiaTab	72	17	22
387	Galb1-4GlcNAcb1-6Galb1-4GlcNAcb-sp2	LNb6'LN	115	37	56		426	Neu5Aca2-3Galb1-3(Fuca1-4)GlcNAcb-sp3	SiaLeA	72	11	15
16	Mana-sp3	aM	114	10	8		48	Neu5Aca-sp3	Sia	71	11	7
52	Neu5Gca-sp3	aNeu5Gc	114	28	34		290	Neu5Aca2-6(Gala1-3)GalNAca-sp3	A3a(Sia)Tn	71	16	10
318	Neu5Aca2-6Galb1-4(6-O-Su)GlcNAcb-sp3	6'SLN6Su	114	11	16		288	3-O-Su-Galb1-4(Fuca1-3)GlcNAcb-sp3	3'SuLeX	70	5	14
394	GlcNAcb1-4(GlcNAcb1-3)Galb1-4GlcNAcb-sp2	GN2-3',4'LN	112	21	10		304	Neu5Gca2-6Galb1-4GlcNAcb-sp3	6'SLN(Gc)	70	12	10
441	Neu5Ac2-6(Fuc1-2)Gal1-4GlcNAc-sp3	Sia6'Htype2	112	16	32		321	(Neu5Aca2-8)3-sp3	(Sia)3	70	5	24
528	Neu5Aca2-3Galb1-4(Fuca1-3)GlcNAcb1-3Galb-sp3	SiaLeX3A	112	19	31		530	(Neu5Aca2-3Galb1)2-3,4-GlcNAcb-sp3	(Sia3A)2-3,4GN	70	4	27
534	Neu5Aca2-3Galb1-4GlcNAcb1-3Galb1-4GlcNAcb-sp3	6'SLN-LN	111	4	6		4	GalNAca1-OSer	TnSer	68	0	25
266	Gala1-4Galb1-4GlcNAcb-sp3	P1	110	7	37		17	Mana-sp4	aM-Gly	68	4	22
48	Neu5Aca-sp3	Sia	108	38	21		121	Manα1-4Manb-sp4	Ma4M	68	12	41
97	Galb1-4GlcNAcb-sp3	LN	108	33	43		429	Neu5Aca2-3(6-O-Su)Galb1-4(Fuca1-3)GlcNAcb-sp3	SiaLeX6'Su	68	3	4
293	Neu5Aca2-3Galb1-4Glcb-sp3	3'SL	108	15	48		123	Manβ1-4GlcNAcb-sp4	Mb4GN	66	7	11
268	GlсNAcb1-4(Fuca1-6)GlcNAcb-sp3	Fa6Ch2	107	9	5		342	Neu5Acα2-3(6-O-Su)Galβ1-3GalNAcα-sp3	6'Su3'SiaTF	66	10	7
396	(GlcNAcb1)3-3,4,6-GalNAca-sp3	GN3-3,4,6Tn	106	3	92		423	Neu5Aca2-3Galb1-4(Fuca1-3)GlcNAcb-sp3	SiaLeX	66	9	6
277	GalN(Gc)a1-3(Fuca1-2)Galb-sp3	NGcAtri	104	6	26		438	Fuc1-2Gal1-4(Fuc1-3)GlcNAc-sp3	LeYbF	66	10	35
309	Neu5Aca2-6(Neu5Aca2-3)GalNAca-sp3	Sia2-3,6Tn	104	12	11		541	Galb1-4(Fuca1-3)GlcNAcb1-6(Fuca1-2Galb1-3GlcNAcb1-3)Galb1-4Glcb-sp4	DFLNH (a)	66	10	23
504	(Aβ1-4GNβ1-2Mα1)2-3,6-Mβ1-4GNβ1-4GNβ-sp4	9-OS	104	6	22		322	(Neu5Aca2-8)3b-sp3	(Sia)3b	64	10	24
527	Neu5Aca2-3Galb1-4GlcNAcb1-3Galb1-4GlcNAcb-sp2	3'SLN-LN	104	22	49		440	Neu5Ac2-6(Fuc1-2)Gal1-4GlcNAc-sp3	bSia6'Htype2	64	4	20
429	Neu5Aca2-3(6-O-Su)Galb1-4(Fuca1-3)GlcNAcb-sp3	SiaLeX6'Su	102	24	48		504	(Aβ1-4GNβ1-2Mα1)2-3,6-Mβ1-4GNβ1-4GNβ-sp4	9-OS	62	11	12
440	Neu5Ac2-6(Fuc1-2)Gal1-4GlcNAc-sp3	bSia6'Htype2	102	8	34		534	Neu5Aca2-3Galb1-4GlcNAcb1-3Galb1-4GlcNAcb-sp3	6'SLN-LN	62	9	10
510	Mana1-6(Mana1-3)Mana1-6(Mana1-3)Mana-sp4	Man5a	102	20	20		316	Fuca1-2(6-O-Su)Galb1-4GlcNAcb-sp3	6'SuHtype2	60	4	42
7	Glca-sp3	aG	100	7	2		510	Mana1-6(Mana1-3)Mana1-6(Mana1-3)Mana-sp4	Man5a	59	3	28
9	Glcb-sp3	bG	100	10	6		441	Neu5Ac2-6(Fuc1-2)Gal1-4GlcNAc-sp3	Sia6'Htype2	58	12	35
423	Neu5Aca2-3Galb1-4(Fuca1-3)GlcNAcb-sp3	SiaLeX	96	16	6		435	Neu5Aca2-3Galb1-4(2-O-Su-Fuca1-3)(6-O-Su)GlcNAcb-sp3	SiaLeX6,2'''Su2	57	11	27
4	GalNAca1-OSer	TnSer	94	7	39		432	Neu5Aca2-3Galb1-4(3-O-Su-Fuca1-3)GlcNAcβ-sp3	SiaLeX3'''Su	56	5	5
17	Mana-sp4	aM-Gly	94	11	12		309	Neu5Aca2-6(Neu5Aca2-3)GalNAca-sp3	Sia2-3,6Tn	52	6	27
306	9-NAc-Neu5Aca2-6Galb1-4GlcNAcb-sp3	9NAc-6'SLN	94	2	53		341	Neu5Aca2-3-(6-O-Su)Galb1-4GlcNAcb-sp2	6'Su3'SLN	52	9	6
LEGEND:
sp2 = C2 = -O(CH2)2NH2
sp3 = C3 = -O(CH2)3NH2
sp4 =Gly = -NHCOCH2NH2
sp5 =C8 = -O(CH2)3NH-CO(CH2)5NH2
sp6 = NH(p-C6H4)CH2CH2NH2 (as-aminoalditol)
sp7 = Ph = -OC6H4-p-NH2
sp8 = PEG = -(OCH2CH2)6NH2
sp9 = Bn = -OCH2C6H4-p-NHCOCH2NH2
sp10 = PEG2 = -(OCH2CH2)2NH2
sp11 = -OCH2CH2CH2SCH2CH2NH2
sp12 = PEG3 = H2N-(CH2CH2O)3-CH2CH2CO
A = Gal
AN = GalNAc
Ch = chito
F = L-Fuc
G = Glc
Gc = glycolyl
GN = GlcNAcb
R = Rha
i = iso
(fur, f) = furanose cycle
Fm = formyl
Lac = lactose
LN = N-acetyllactosamine
M = Man
MN = ManNAc
Malt = maltose
OS = oligosaccharide
P = phosphate
S = Sia = Neu5Aca
Su = sulfate
Tn = GalNAca
U = uronic acid

## Sheet: Suppl Table S3
	Supplementary Table S3.
	Profiling of human antibodies isolated using the affinity adsorbent LeC-Sepharose from pooled sera of 103 healthy donors (blood group A).
	Data from CFG (request 2505). Available from http://functionalglycomics.com/glycomics/publicdata/primaryscreen.jsp
Chart Number	Anti-LeC 20ug/ml Slide#14905 CFG#2505 v5.0 IgM Alexa488 12/13/11 HJ	Average RFU	StDev	% CV		Chart Number	Anti-LeC 20ug/ml Slide#14905 CFG#2505 v5.0 IgG Alexa633 12/13/11 HJ	Average RFU	StDev	% CV
31	(3S)Galb1-3GlcNAcb-Sp8	17231.9	1374.2	7.97474		30	(3S)Galb1-3GlcNAcb-Sp0	58826.4	453.341	0.770642
82	Fucb1-3GlcNAcb-Sp8	16477.8	705.541	4.28176		31	(3S)Galb1-3GlcNAcb-Sp8	55355.6	2540.88	4.59011
151	Galb1-3GlcNAcb-Sp8	16474.5	312.732	1.89829		444	(6S)Galb1-3GlcNAcb-Sp0	52162.2	3804.41	7.29341
492	Neu5Aca2-3Galb1-3GlcNAcb1-6GalNAca-Sp14	15259.8	405.376	2.6565		151	Galb1-3GlcNAcb-Sp8	49247.8	2228.94	4.52598
490	Gala1-3Galb1-3GlcNAcb1-6GalNAca-Sp14	11803.4	1227.48	10.3994		295	Neu5Aca2-3Galb1-3GlcNAcb1-3Galb1-3GlcNAcb-Sp0	47678.3	3930.81	8.24444
308	GlcAb1-3GlcNAcb-Sp8	11308.4	687.092	6.07593		563	GalNAcb1-3GlcNAcb-Sp0	47026.5	599.65	1.27513
251	Neu5Aca2-3Galb1-3GlcNAcb-Sp8	10090	998.303	9.89402		251	Neu5Aca2-3Galb1-3GlcNAcb-Sp8	46672.4	1895.29	4.06085
17	GlcNAcb-Sp8	9485.32	480.238	5.06296		250	Neu5Aca2-3Galb1-3GlcNAcb-Sp0	46496.4	1428.02	3.07124
150	Galb1-3GlcNAcb-Sp0	9311.93	286.578	3.07753		82	Fucb1-3GlcNAcb-Sp8	45852.2	89.973	0.196224
115	Gala1-3Galb1-3GlcNAcb-Sp0	9185.68	719.615	7.8341		150	Galb1-3GlcNAcb-Sp0	45674.1	2346.15	5.13672
294	Galb1-4GlcNAcb1-3Galb1-3GlcNAcb-Sp0	9105.46	406.085	4.45979		330	Neu5,9Ac2a2-3Galb1-3GlcNAcb-Sp0	45604.3	303.584	0.665691
331	Neu5Aca2-6Galb1-4GlcNAcb1-3Galb1-3GlcNAcb-Sp0	8846.16	491.559	5.55676		282	Neu5Gca2-3Galb1-3GlcNAcb-Sp0	45597.5	1996.99	4.3796
16	GlcNAcb-Sp0	8361.54	569.216	6.80755		17	GlcNAcb-Sp8	44296.5	1439.14	3.24887
489	Galb1-3GlcNAcb1-6GalNAca-Sp14	7563.77	382.477	5.05669		331	Neu5Aca2-6Galb1-4GlcNAcb1-3Galb1-3GlcNAcb-Sp0	43736.4	559.342	1.27889
296	Neu5Aca2-3Galb1-4GlcNAcb1-3Galb1-3GlcNAcb-Sp0	7491.41	373.857	4.99047		115	Gala1-3Galb1-3GlcNAcb-Sp0	43517.2	571.526	1.31333
290	Galb1-3GlcNAcb1-3Galb1-3GlcNAcb-Sp0	7467.44	128.883	1.72593		296	Neu5Aca2-3Galb1-4GlcNAcb1-3Galb1-3GlcNAcb-Sp0	43366.8	1523.85	3.51386
282	Neu5Gca2-3Galb1-3GlcNAcb-Sp0	7116.76	494.565	6.9493		206	KDNa2-3Galb1-3GlcNAcb-Sp0	43194.2	912.69	2.11299
330	Neu5,9Ac2a2-3Galb1-3GlcNAcb-Sp0	7103.58	143.857	2.02513		498	Fuca1-2(6S)Galb1-3GlcNAcb-Sp0	42760.7	2996.41	7.00739
30	(3S)Galb1-3GlcNAcb-Sp0	6952.06	718.772	10.339		143	Galb1-3GalNAcb-Sp8	42578	3042.3	7.14524
250	Neu5Aca2-3Galb1-3GlcNAcb-Sp0	6896.55	518.576	7.51936		341	GlcNAca1-4Galb1-3GlcNAcb-Sp0	42298.8	860.703	2.03482
206	KDNa2-3Galb1-3GlcNAcb-Sp0	6540.87	468.029	7.15545		308	GlcAb1-3GlcNAcb-Sp8	42183.6	646.846	1.53341
295	Neu5Aca2-3Galb1-3GlcNAcb1-3Galb1-3GlcNAcb-Sp0	6237.82	149.567	2.39775		290	Galb1-3GlcNAcb1-3Galb1-3GlcNAcb-Sp0	41297.9	653.214	1.58171
407	Galb1-3GlcNAcb1-6Galb1-4GlcNAcb-Sp0	6065.75	301.53	4.97103		408	Galb1-3GlcNAca1-6Galb1-4GlcNAcb-Sp0	40602.5	1039	2.55895
143	Galb1-3GalNAcb-Sp8	5711.36	485.792	8.50571		16	GlcNAcb-Sp0	39273.3	2261.87	5.75932
194	GlcNAcb1-6GalNAca-Sp14	5369.88	265.16	4.93792		492	Neu5Aca2-3Galb1-3GlcNAcb1-6GalNAca-Sp14	39184.6	2285.83	5.83349
193	GlcNAcb1-6GalNAca-Sp8	4932.1	315.409	6.39502		407	Galb1-3GlcNAcb1-6Galb1-4GlcNAcb-Sp0	38957	2018.48	5.1813
341	GlcNAca1-4Galb1-3GlcNAcb-Sp0	4731.01	237.103	5.01168		510	Galb1-3GlcNAca1-3Galb1-4GlcNAcb-Sp8	38840.4	1090.55	2.80777
563	GalNAcb1-3GlcNAcb-Sp0	4546.08	248.008	5.45542		294	Galb1-4GlcNAcb1-3Galb1-3GlcNAcb-Sp0	38768.8	1019.9	2.63073
444	(6S)Galb1-3GlcNAcb-Sp0	4526.8	320.677	7.08397		193	GlcNAcb1-6GalNAca-Sp8	38091.6	582.286	1.52865
539	Galb1-3GalNAcb1-3Gal-Sp21	4489.47	127.778	2.84617		281	Neu5Gca2-3Galb1-3(Fuca1-4)GlcNAcb-Sp0	37567.8	1136.43	3.02501
568	Galb1-3GlcNAcb1-6(Galb1-3)GalNAc-Sp14	3739.72	311.229	8.32224		490	Gala1-3Galb1-3GlcNAcb1-6GalNAca-Sp14	37292.3	1271.08	3.40843
408	Galb1-3GlcNAca1-6Galb1-4GlcNAcb-Sp0	3092.21	181.731	5.87707		539	Galb1-3GalNAcb1-3Gal-Sp21	37276.9	1366.02	3.66452
510	Galb1-3GlcNAca1-3Galb1-4GlcNAcb-Sp8	3004.63	297.035	9.88593		610	GlcNAcb1-3Fuca-Sp21	36495.2	2308.59	6.32574
498	Fuca1-2(6S)Galb1-3GlcNAcb-Sp0	2867.91	282.532	9.85152		146	Galb1-3GalNAcb1-4Galb1-4Glcb-Sp8	35989.2	2412.96	6.70469
146	Galb1-3GalNAcb1-4Galb1-4Glcb-Sp8	2691.79	104.931	3.89816		194	GlcNAcb1-6GalNAca-Sp14	35885.4	988.066	2.75339
144	Galb1-3GalNAcb1-3Gala1-4Galb1-4Glcb-Sp0	2103.3	110.526	5.25489		124	Gala1-4GlcNAcb-Sp8	33814.5	2768.96	8.18867
69	Fuca1-2Galb1-3GlcNAcb-Sp8	2034.5	150.355	7.3903		568	Galb1-3GlcNAcb1-6(Galb1-3)GalNAc-Sp14	33425.3	837.671	2.5061
13	Glcb-Sp8	1540.9	147.282	9.55818		445	(6S)Galb1-3(6S)GlcNAc-Sp0	33300.5	5424.16	16.2885
477	Galb1-3GlcNAcb1-2Mana1-6(GlcNAcb1-4)(Galb1-3GlcNAcb1-2Mana1-3)Manb1-4GlcNAcb1-4GlcNAcb-Sp21	1492.01	130.809	8.76735		489	Galb1-3GlcNAcb1-6GalNAca-Sp14	32448	604.853	1.86407
511	Galb1-3(6S)GlcNAcb-Sp8	1456.72	150.686	10.3442		525	Galb1-3GlcNAcb1-2Mana-Sp0	29911.2	2750.18	9.1945
528	Gala1-3Galb1-3GlcNAcb1-2Mana-Sp0	1359.97	90.8307	6.67888		69	Fuca1-2Galb1-3GlcNAcb-Sp8	29591.6	1219.49	4.12107
68	Fuca1-2Galb1-3GlcNAcb-Sp0	1354.84	25.6951	1.89655		477	Galb1-3GlcNAcb1-2Mana1-6(GlcNAcb1-4)(Galb1-3GlcNAcb1-2Mana1-3)Manb1-4GlcNAcb1-4GlcNAcb-Sp21	28875.1	2955.93	10.237
445	(6S)Galb1-3(6S)GlcNAc-Sp0	1259.44	208.768	16.5763		144	Galb1-3GalNAcb1-3Gala1-4Galb1-4Glcb-Sp0	27813.5	958.005	3.44439
103	Gala1-3(Fuca1-2)Galb1-3GlcNAcb-Sp8	1216.19	79.8619	6.56655		68	Fuca1-2Galb1-3GlcNAcb-Sp0	22413.4	1877.25	8.37557
102	Gala1-3(Fuca1-2)Galb1-3GlcNAcb-Sp0	1177.12	172.176	14.6269		103	Gala1-3(Fuca1-2)Galb1-3GlcNAcb-Sp8	22386.6	735.435	3.28515
525	Galb1-3GlcNAcb1-2Mana-Sp0	1145.11	72.3108	6.31472		511	Galb1-3(6S)GlcNAcb-Sp8	21186.5	1031.75	4.86984
83	GalNAca1-3(Fuca1-2)Galb1-3GlcNAcb-Sp0	1137.9	72.4729	6.36899		200	Glcb1-6Glcb-Sp8	20247.2	1406.75	6.94787
527	Neu5Aca2-3Galb1-3GlcNAcb1-2Mana-Sp0	1118.67	67.3919	6.02429		102	Gala1-3(Fuca1-2)Galb1-3GlcNAcb-Sp0	19347.4	1903.35	9.83774
281	Neu5Gca2-3Galb1-3(Fuca1-4)GlcNAcb-Sp0	1114.29	163.91	14.7098		175	GlcNAca1-6Galb1-4GlcNAcb-Sp8	18571.5	527.957	2.84284
195	GlcNAcb1-6Galb1-4GlcNAcb-Sp8	1037.14	105.573	10.1793		83	GalNAca1-3(Fuca1-2)Galb1-3GlcNAcb-Sp0	16868.1	702.961	4.16739
605	GlcNAcb1-6(Neu5Aca2-3Galb1-3)GalNAca-Sp14	923.802	216.38	23.4228		13	Glcb-Sp8	16407.7	1199.35	7.30967
191	GlcNAcb1-4GlcNAcb1-4GlcNAcb1-4GlcNAcb1-4GlcNAcb1-Sp8	906.264	84.2307	9.29428		429	Galb1-3GlcNAcb1-6(Galb1-3GlcNAcb1-2)Mana1-6(Galb1-3GlcNAcb1-2Mana1-3)Manb1-4GlcNAcb1-4GlcNAcb-Sp19	15269.5	299.032	1.95836
135	GlcNAcb1-6(Galb1-3)GalNAca-Sp14	901.954	56.6924	6.28551		191	GlcNAcb1-4GlcNAcb1-4GlcNAcb1-4GlcNAcb1-4GlcNAcb1-Sp8	14780.8	764.249	5.17055
572	Galb1-3GlcNAcb1-3Galb1-4GlcNAcb1-3Galb1-4GlcNAcb1-6(Galb1-3GlcNAcb1-3Galb1-4GlcNAcb1-3Galb1-4GlcNAb1-2)Mana1-6(Galb1-3GlcNAcb1-3Galb1-4GlcNAcb1-3Galb1-4GlcNAcb1-2Mana1-3)Manb1-4GlcNAcb1-4(Fuca1-6)GlcNAcb-Sp24	787.723	19.3955	2.46222		2	Glca-Sp8	14483	3916.98	27.0453
174	GlcNAca1-3Galb1-4GlcNAcb-Sp8	696.319	70.4115	10.112		174	GlcNAca1-3Galb1-4GlcNAcb-Sp8	14028.3	582.021	4.14892
610	GlcNAcb1-3Fuca-Sp21	693.194	61.5595	8.88056		125	Gala1-6Glcb-Sp8	13614.6	2071.14	15.2126
169	Galb1-4GlcNAcb-Sp0	661.479	51.297	7.7549		605	GlcNAcb1-6(Neu5Aca2-3Galb1-3)GalNAca-Sp14	13128.3	2196.29	16.7295
429	Galb1-3GlcNAcb1-6(Galb1-3GlcNAcb1-2)Mana1-6(Galb1-3GlcNAcb1-2Mana1-3)Manb1-4GlcNAcb1-4GlcNAcb-Sp19	658.509	64.4642	9.78942		135	GlcNAcb1-6(Galb1-3)GalNAca-Sp14	12815.1	2316.72	18.0781
200	Glcb1-6Glcb-Sp8	634.407	89.2811	14.0732		527	Neu5Aca2-3Galb1-3GlcNAcb1-2Mana-Sp0	10791.5	1090.3	10.1034
175	GlcNAca1-6Galb1-4GlcNAcb-Sp8	575.049	26.1664	4.5503		195	GlcNAcb1-6Galb1-4GlcNAcb-Sp8	10449.6	1028.37	9.84125
190	GlcNAcb1-4GlcNAcb1-4GlcNAcb1-4GlcNAcb1-4GlcNAcb1-4GlcNAcb1-Sp8	535.57	104.68	19.5456		149	Galb1-3GlcNAcb1-3Galb1-4Glcb-Sp10	10247.5	416.908	4.06837
2	Glca-Sp8	529.637	106.198	20.0512		169	Galb1-4GlcNAcb-Sp0	9329.34	266.53	2.8569
124	Gala1-4GlcNAcb-Sp8	514.334	40.8764	7.94745		129	Galb1-3(Fuca1-4)GlcNAc-Sp0	8970.72	142.141	1.58449
130	Galb1-3(Fuca1-4)GlcNAc-Sp8	454.758	49.3549	10.853		126	Galb1-2Galb-Sp8	8795.97	512.356	5.82489
314	Mana1-6Manb-Sp10	448.123	88.0134	19.6405		572	Galb1-3GlcNAcb1-3Galb1-4GlcNAcb1-3Galb1-4GlcNAcb1-6(Galb1-3GlcNAcb1-3Galb1-4GlcNAcb1-3Galb1-4GlcNAb1-2)Mana1-6(Galb1-3GlcNAcb1-3Galb1-4GlcNAcb1-3Galb1-4GlcNAcb1-2Mana1-3)Manb1-4GlcNAcb1-4(Fuca1-6)GlcNAcb-Sp24	8401.12	1450.09	17.2607
138	Neu5Acb2-6(Galb1-3)GalNAca-Sp8	440.934	9.93573	2.25334		130	Galb1-3(Fuca1-4)GlcNAc-Sp8	8104.62	237.011	2.9244
192	GlcNAcb1-4GlcNAcb1-4GlcNAcb-Sp8	406.537	29.0757	7.15203		190	GlcNAcb1-4GlcNAcb1-4GlcNAcb1-4GlcNAcb1-4GlcNAcb1-4GlcNAcb1-Sp8	7896.73	1244.14	15.7552
325	Galb1-3GlcNAcb1-2Mana1-6(Galb1-3GlcNAcb1-2Mana1-3)Manb1-4GlcNAcb1-4GlcNAcb-Sp19	397.571	56.857	14.3011		528	Gala1-3Galb1-3GlcNAcb1-2Mana-Sp0	7530.42	531.033	7.05184
182	GlcNAcb1-3Galb-Sp8	388.146	46.7842	12.0532		147	Galb1-3Galb-Sp8	7379.81	846.991	11.4771
604	Neu5Aca2-3Galb1-4GlcNAcb1-3Galb1-4GlcNAcb1-2Mana1-6(Neu5Aca2-3Galb1-4GlcNAcb1-3Galb1-4GlcNAcb1-2Mana1-3)Manb1-4GlcNAcb1-4GlcNAcb-Sp12	378.939	11.9723	3.15944		314	Mana1-6Manb-Sp10	7196.75	332.396	4.6187
147	Galb1-3Galb-Sp8	377.552	39.0262	10.3366		421	Fuca1-2Galb1-4GlcNAcb1-2Mana1-6(Fuca1-2Galb1-4GlcNAcb1-2Mana1-3)Manb1-4GlcNAcb1-4(Fuca1-6)GlcNAcb-Sp22	6952.51	245.332	3.52868
129	Galb1-3(Fuca1-4)GlcNAc-Sp0	375.226	24.4557	6.5176		299	(6P)Glcb-Sp10	6700.65	1373.57	20.4991
140	Galb1-3GalNAca-Sp8	369.568	5.53699	1.49823		3	Mana-Sp8	6678.12	230.983	3.4588
126	Galb1-2Galb-Sp8	366.698	55.5711	15.1545		14	Manb-Sp8	6674.12	1054.36	15.7977
131	Fuca1-4(Galb1-3)GlcNAcb-Sp8	358.931	13.7157	3.82126		192	GlcNAcb1-4GlcNAcb1-4GlcNAcb-Sp8	6580.58	1008.28	15.322
14	Manb-Sp8	352.479	41.7244	11.8374		506	Fuca1-2Galb1-3GlcNAcb1-6(Fuca1-2Galb1-3GlcNAcb1-3)GalNAca-Sp14	6469.06	679.152	10.4985
189	GlcNAcb1-4Galb1-4GlcNAcb-Sp8	351.506	32.167	9.1512		1	Gala-Sp8	6450.68	490.819	7.60879
134	GlcNAcb1-6(Galb1-3)GalNAca-Sp8	341.177	69.2222	20.2892		134	GlcNAcb1-6(Galb1-3)GalNAca-Sp8	6305.36	870.531	13.8062
3	Mana-Sp8	339.675	33.3744	9.82539		501	Fuca1-2Galb1-3(6S)GlcNAcb-Sp0	5959.78	550.261	9.23291
301	Galb1-3Galb1-4GlcNAcb-Sp8	328.701	107.08	32.5767		25	(3S)Galb1-4Glcb-Sp8	5599.71	624.986	11.161
149	Galb1-3GlcNAcb1-3Galb1-4Glcb-Sp10	320.663	53.2968	16.6208		12	Galb-Sp8	5539.24	580.987	10.4886
501	Fuca1-2Galb1-3(6S)GlcNAcb-Sp0	309.54	41.6539	13.4567		131	Fuca1-4(Galb1-3)GlcNAcb-Sp8	5363.79	185.802	3.464
239	Neu5Aca2-3Galb1-3(6S)GlcNAc-Sp8	306.365	31.1005	10.1514		118	Gala1-3Galb1-4Glc-Sp10	5361.66	282.627	5.27127
441	Galb1-6Galb-Sp10	305.951	53.7335	17.5628		604	Neu5Aca2-3Galb1-4GlcNAcb1-3Galb1-4GlcNAcb1-2Mana1-6(Neu5Aca2-3Galb1-4GlcNAcb1-3Galb1-4GlcNAcb1-2Mana1-3)Manb1-4GlcNAcb1-4GlcNAcb-Sp12	5330.26	380.025	7.12958
442	Neu5Aca2-3Galb1-4GlcNAcb1-3Galb-Sp8	304.381	18.5696	6.10078		301	Galb1-3Galb1-4GlcNAcb-Sp8	5262.37	71.8193	1.36477
12	Galb-Sp8	304.352	13.2849	4.36496		560	Galb1-4GlcNAcb1-3Galb1-4GlcNAcb1-6(Galb1-4GlcNAcb1-3Galb1-4GlcNAcb1-2)Mana1-6(Galb1-4GlcNAcb1-3Galb1-4GlcNAcb1-2Mana1-3)Mana1-4GlcNAcb1-4GlcNAc-Sp24	5237.44	383.394	7.32024
506	Fuca1-2Galb1-3GlcNAcb1-6(Fuca1-2Galb1-3GlcNAcb1-3)GalNAca-Sp14	283.248	81.7243	28.8526		15	GalNAcb-Sp8	5103.39	468.655	9.1832
421	Fuca1-2Galb1-4GlcNAcb1-2Mana1-6(Fuca1-2Galb1-4GlcNAcb1-2Mana1-3)Manb1-4GlcNAcb1-4(Fuca1-6)GlcNAcb-Sp22	280.836	28.7857	10.25		101	Gala1-2Galb-Sp8	4756.06	345.465	7.26367
383	Galb1-3GlcNAcb1-3Galb1-4GlcNAcb1-6(Galb1-3GlcNAcb1-3)Galb1-4Glcb-Sp0	278.577	23.6202	8.47889		552	Galb1-3GlcNAcb1-3Galb1-4GlcNAcb1-2Mana1-6(Galb1-3GlcNAcb1-3Galb1-4GlcNAcb1-2Mana1-3)Manb1-4GlcNAcb1-4GlcNAc-Sp25	4603.93	308.533	6.70152
81	Fuca1-4GlcNAcb-Sp8	278.238	22.7164	8.1644		189	GlcNAcb1-4Galb1-4GlcNAcb-Sp8	4521.63	233.331	5.16032
479	Neu5Aca2-3Galb1-4GlcNAcb1-2Mana-Sp0	275.491	92.7783	33.6774		493	(3S)Galb1-3(Fuca1-4)GlcNAcb-Sp0	4440.88	329.711	7.42445
125	Gala1-6Glcb-Sp8	272.488	34.3904	12.6209		166	Galb1-4GlcNAcb1-3Galb1-4Glcb-Sp8	4266.02	137.584	3.22511
136	Neu5Aca2-6(Galb1-3)GalNAca-Sp8	272.026	31.948	11.7445		138	Neu5Acb2-6(Galb1-3)GalNAca-Sp8	4091.4	82.3973	2.01392
355	Galb1-3GlcNAcb1-2Mana1-6(Galb1-3GlcNAcb1-2Mana1-3)Manb1-4GlcNAcb1-4(Fuca1-6)GlcNAcb-Sp22	269.754	16.4897	6.11289		81	Fuca1-4GlcNAcb-Sp8	4063.43	233.528	5.74708
554	Neu5Aca2-8Neu5Gca2-3Galb1-4GlcNAc-Sp0	268.016	42.3258	15.7923		479	Neu5Aca2-3Galb1-4GlcNAcb1-2Mana-Sp0	4044.73	555.515	13.7343
141	Galb1-3GalNAca-Sp14	267.548	67.1765	25.1082		592	Galb1-4GlcNAcb1-3Galb1-4GlcNAcb1-6(Galb1-4GlcNAcb1-3Galb1-4GlcNAcb1-3)GalNAca-Sp14	4002.98	167.248	4.1781
573	Galb1-3GlcNAcb1-3Galb1-4GlcNAcb1-6(Galb1-3GlcNAcb1-3Galb1-4GlcNAb1-2)Mana1-6(Galb1-3GlcNAcb1-3Galb1-4GlcNAcb1-2Mana1-3)Manb1-4GlcNAcb1-4(Fuca1-6)GlcNAcb-Sp24	266.811	26.1174	9.78872		383	Galb1-3GlcNAcb1-3Galb1-4GlcNAcb1-6(Galb1-3GlcNAcb1-3)Galb1-4Glcb-Sp0	3904.25	294.82	7.55127
592	Galb1-4GlcNAcb1-3Galb1-4GlcNAcb1-6(Galb1-4GlcNAcb1-3Galb1-4GlcNAcb1-3)GalNAca-Sp14	259.137	10.4733	4.04159		34	(3S)Galb1-4(6S)GlcNAcb-Sp0	3751.42	851.875	22.7081
15	GalNAcb-Sp8	258.24	73.6478	28.5191		139	Neu5Aca2-6(Galb1-3)GlcNAcb1-4Galb1-4Glcb-Sp10	3713.37	150.733	4.0592
552	Galb1-3GlcNAcb1-3Galb1-4GlcNAcb1-2Mana1-6(Galb1-3GlcNAcb1-3Galb1-4GlcNAcb1-2Mana1-3)Manb1-4GlcNAcb1-4GlcNAc-Sp25	254.504	18.7762	7.37756		26	(3S)Galb1-4(6S)Glcb-Sp0	3610.48	322.515	8.93274
167	Galb1-4GlcNAcb1-6(Galb1-3)GalNAca-Sp8	249.568	35.7779	14.3359		197	Glca1-4Glca-Sp8	3574.79	42.4211	1.18667
203	GlcAb-Sp8	247.939	29.2195	11.785		427	Fuca1-2Galb1-3GlcNAcb1-2Mana1-6(Fuca1-2Galb1-3GlcNAcb1-2Mana1-3)Manb1-4GlcNAcb1-4(Fuca1-6)GlcNAcb-Sp22	3572.58	157.264	4.40197
201	G-ol-Sp8	242.849	11.9166	4.907		140	Galb1-3GalNAca-Sp8	3486.98	294.812	8.45464
299	(6P)Glcb-Sp10	237.253	27.9634	11.7863		141	Galb1-3GalNAca-Sp14	3482.9	334.972	9.61763
139	Neu5Aca2-6(Galb1-3)GlcNAcb1-4Galb1-4Glcb-Sp10	232.567	20.3465	8.74866		172	Galb1-4Glcb-Sp0	3417.39	273.864	8.01384
381	Galb1-3GalNAca1-3(Fuca1-2)Galb1-4Glc-Sp0	222.829	34.5949	15.5253		455	GalNAca1-3(Fuca1-2)Galb1-4GlcNAcb1-2Mana1-6(GalNAca1-3(Fuca1-2)Galb1-4GlcNAcb1-2Mana1-3)Manb1-4GlcNAcb1-4(Fuca1-6)GlcNAcb-Sp22	3412.24	276.239	8.09551
534	Fuca1-4(Galb1-3)GlcNAcb1-2 Mana-Sp0	222.1	57.7662	26.0091		441	Galb1-6Galb-Sp10	3341.86	155.493	4.6529
101	Gala1-2Galb-Sp8	221.954	38.5407	17.3643		381	Galb1-3GalNAca1-3(Fuca1-2)Galb1-4Glc-Sp0	3297.58	227.803	6.9082
530	Neu5Aca2-3Galb1-3GlcNAcb1-4Galb1-4Glcb-Sp0	219.415	18.6705	8.50921		542	Galb1-4GlcNAcb1-3Galb1-4GlcNAcb1-2Mana1-6(Galb1-4GlcNAcb1-3Galb1-4GlcNAcb1-2Mana1-3)Manb1-4GlcNAcb1-4GlcNAcb-Sp12	3203.22	319.308	9.96835
79	Fuca1-2Galb-Sp8	215.047	36.7311	17.0805		199	Glcb1-4Glcb-Sp8	3154.31	259.63	8.23098
359	KDNa2-3Galb1-4Glc-Sp0	213.483	46.841	21.9413		397	Neu5Aca2-3Galb1-3GlcNAcb1-2Mana1-6(Neu5Aca2-3Galb1-3GlcNAcb1-2Mana1-3)Manb1-4GlcNAcb1-4GlcNAc-Sp19	3139.54	112.572	3.5856
454	GalNAcb1-4Galb1-4Glcb-Sp0	212.489	40.4827	19.0516		355	Galb1-3GlcNAcb1-2Mana1-6(Galb1-3GlcNAcb1-2Mana1-3)Manb1-4GlcNAcb1-4(Fuca1-6)GlcNAcb-Sp22	3113.82	59.0996	1.89798
142	Galb1-3GalNAca-Sp16	208.765	36.09	17.2874		454	GalNAcb1-4Galb1-4Glcb-Sp0	3067.86	167.202	5.4501
172	Galb1-4Glcb-Sp0	208.194	54.0945	25.9827		530	Neu5Aca2-3Galb1-3GlcNAcb1-4Galb1-4Glcb-Sp0	3059.42	344.113	11.2477
118	Gala1-3Galb1-4Glc-Sp10	207.811	38.0205	18.2957		534	Fuca1-4(Galb1-3)GlcNAcb1-2 Mana-Sp0	3058.61	183.865	6.01139
364	Gala1-3Galb1-4GlcNAcb1-2Mana1-6(Gala1-3Galb1-4GlcNAcb1-2Mana1-3)Manb1-4GlcNAcb1-4GlcNAcb-Sp20	207.389	28.2961	13.644		608	Neu5Aca2-3Galb1-4GlcNAcb1-3Galb1-4GlcNAcb1-3Galb1-4GlcNAcb1-2Mana1-6(Neu5Aca2-3Galb1-4GlcNAcb1-3Galb1-4GlcNAcb1-3Galb1-4GlcNAcb1-2Mana1-3)Manb1-4GlcNAcb1-4GlcNAcb-Sp12	3027.75	255.804	8.44863
503	Neu5Aca2-6GalNAcb1-4(6S)GlcNAcb-Sp8	205.109	47.6125	23.2132		79	Fuca1-2Galb-Sp8	3018.58	206.451	6.83935
564	GalNAcb1-4GlcNAcb1-3GalNAcb1-4GlcNAcb-Sp0	201.713	21.4983	10.6579		41	(6P)Mana-Sp8	2983.52	108.879	3.64934
173	Galb1-4Glcb-Sp8	199.699	21.8994	10.9662		167	Galb1-4GlcNAcb1-6(Galb1-3)GalNAca-Sp8	2976.42	220.053	7.39322
157	Galb1-4(6S)Glcb-Sp8	194.602	31.3876	16.1291		239	Neu5Aca2-3Galb1-3(6S)GlcNAc-Sp8	2942.39	171.988	5.84517
542	Galb1-4GlcNAcb1-3Galb1-4GlcNAcb1-2Mana1-6(Galb1-4GlcNAcb1-3Galb1-4GlcNAcb1-2Mana1-3)Manb1-4GlcNAcb1-4GlcNAcb-Sp12	194.483	34.9238	17.9572		364	Gala1-3Galb1-4GlcNAcb1-2Mana1-6(Gala1-3Galb1-4GlcNAcb1-2Mana1-3)Manb1-4GlcNAcb1-4GlcNAcb-Sp20	2861.13	146.68	5.12665
426	Gala1-3Galb1-3GlcNAcb1-3GalNAc-Sp14	192.793	65.835	34.148		154	Galb1-4(Fuca1-3)GlcNAcb1-3Galb1-4(Fuca1-3)GlcNAcb-Sp0	2851.47	48.8342	1.7126
133	Galb1-4GlcNAcb1-6GalNAc-Sp14	192.364	33.5595	17.4458		343	GlcNAca1-4Galb1-4GlcNAcb1-3Galb1-4(Fuca1-3)GlcNAcb1-3Galb1-4(Fuca1-3)GlcNAcb-Sp0	2845.2	106.584	3.7461
475	Neu5Aca2-3Galb1-3GlcNAcb1-6(Neu5Aca2-3Galb1-4GlcNAcb1-2)Mana1-6(Neu5Aca2-3Galb1-3GlcNAcb1-2Mana1-3)Manb1-4GlcNAcb1-4GlcNAcb-Sp19	190.833	21.4049	11.2166		456	Gala1-3(Fuca1-2)Galb1-3GlcNAcb1-2Mana1-6(Gala1-3(Fuca1-2)Galb1-3GlcNAcb1-2Mana1-3)Manb1-4GlcNAcb1-4(Fuca1-6)GlcNAcb-Sp22	2826.05	254.917	9.02024
597	Neu5Aca2-3Galb1-4GlcNAcb1-3Galb1-4GlcNAcb1-6(Neu5Aca2-3Galb1-4GlcNAcb1-3Galb1-4GlcNAcb1-3)GalNAca-Sp14	189.693	24.2235	12.7698		107	Gala1-3(Fuca1-2)Galb1-4Glcb-Sp0	2821.92	245.994	8.71723
92	GalNAca1-3GalNAcb-Sp8	187.678	20.4536	10.8983		245	Neu5Aca2-6(Neu5Aca2-3Galb1-3)GalNAca-Sp14	2785.11	247.993	8.90424
122	Gala1-4Galb1-4GlcNAcb-Sp8	187.139	33.8444	18.0852		307	GalNAcb1-3Galb-Sp8	2747.56	316.573	11.522
1	Gala-Sp8	186.213	23.164	12.4395		500	Fuca1-2Galb1-4GlcNAcb1-2Mana-Sp0	2744.34	228.047	8.30973
34	(3S)Galb1-4(6S)GlcNAcb-Sp0	185.081	29.0653	15.7041		173	Galb1-4Glcb-Sp8	2741.91	272.974	9.9556
608	Neu5Aca2-3Galb1-4GlcNAcb1-3Galb1-4GlcNAcb1-3Galb1-4GlcNAcb1-2Mana1-6(Neu5Aca2-3Galb1-4GlcNAcb1-3Galb1-4GlcNAcb1-3Galb1-4GlcNAcb1-2Mana1-3)Manb1-4GlcNAcb1-4GlcNAcb-Sp12	183.106	28.3339	15.4741		80	Fuca1-3GlcNAcb-Sp8	2686.11	201.833	7.51396
95	GalNAcb1-3GalNAca-Sp8	182.138	30.0389	16.4924		499	Gala1-3(Fuca1-2)Galb1-4GlcNAcb1-6GalNAca-Sp14	2683.9	582.448	21.7016
159	Galb1-4GalNAcb1-3(Fuca1-2)Galb1-4GlcNAcb-Sp8	175.533	9.29357	5.29449		496	Gala1-3Galb1-4GlcNAcb1-6GalNAca-Sp14	2670.72	257.129	9.62771
427	Fuca1-2Galb1-3GlcNAcb1-2Mana1-6(Fuca1-2Galb1-3GlcNAcb1-2Mana1-3)Manb1-4GlcNAcb1-4(Fuca1-6)GlcNAcb-Sp22	174.527	35.5212	20.3529		591	Galb1-4GlcNAcb1-3Galb1-4GlcNAcb1-6(Galb1-3)GalNAca-Sp14	2668.54	279.566	10.4764
156	Galb1-4(6S)Glcb-Sp0	174.291	15.9688	9.16218		521	Neu5Aca2-6Galb1-4GlcNAcb1-2Man-Sp0	2663.64	235.885	8.85574
41	(6P)Mana-Sp8	170.014	22.1392	13.022		428	Gala1-3(Fuca1-2)Galb1-4GlcNAcb1-2Mana1-6(Gala1-3(Fuca1-2)Galb1-4GlcNAcb1-2Mana1-3)Manb1-4GlcNAcb1-4(Fuca1-6)GlcNAcb-Sp22	2639.48	142.805	5.41035
560	Galb1-4GlcNAcb1-3Galb1-4GlcNAcb1-6(Galb1-4GlcNAcb1-3Galb1-4GlcNAcb1-2)Mana1-6(Galb1-4GlcNAcb1-3Galb1-4GlcNAcb1-2Mana1-3)Mana1-4GlcNAcb1-4GlcNAc-Sp24	169.56	15.1131	8.91309		457	Neu5Aca2-6Galb1-4GlcNAcb1-6(Fuca1-2Galb1-3GlcNAcb1-3)Galb1-4Glc-Sp21	2612.41	409.737	15.6842
116	Gala1-3Galb1-4GlcNAcb-Sp8	169.207	10.4509	6.1764		198	Glca1-6Glca1-6Glcb-Sp8	2610.72	146.037	5.59375
202	GlcAa-Sp8	168.648	19.9199	11.8116		182	GlcNAcb1-3Galb-Sp8	2608.21	161.862	6.20585
499	Gala1-3(Fuca1-2)Galb1-4GlcNAcb1-6GalNAca-Sp14	168.323	72.0585	42.8098		446	Fuca1-2Galb1-4 GlcNAcb1-2Mana1-6(Fuca1-2Galb1-4GlcNAcb1-2(Fuca1-2Galb1-4GlcNAcb1-4)Mana1-3)Manb1-4GlcNAcb1-4GlcNAcb-Sp12	2589.52	58.2534	2.24958
387	Galb1-3GlcNAcb1-3Galb1-4(Fuca1-3)GlcNAcb1-6(Galb1-3GlcNAcb1-3)Galb1-4Glc-Sp21	168.307	26.5395	15.7685		310	GlcNAcb1-3Man-Sp10	2586.95	129.877	5.02047
96	GalNAcb1-3(Fuca1-2)Galb-Sp8	166.101	33.4692	20.1499		475	Neu5Aca2-3Galb1-3GlcNAcb1-6(Neu5Aca2-3Galb1-4GlcNAcb1-2)Mana1-6(Neu5Aca2-3Galb1-3GlcNAcb1-2Mana1-3)Manb1-4GlcNAcb1-4GlcNAcb-Sp19	2560.96	167.119	6.52566
496	Gala1-3Galb1-4GlcNAcb1-6GalNAca-Sp14	165.934	52.4709	31.6216		67	Fuca1-2Galb1-3GlcNAcb1-3Galb1-4Glcb-Sp10	2544.92	251.079	9.86591
356	(6S)GlcNAcb1-3Galb1-4GlcNAcb-Sp0	165.903	8.82492	5.31932		92	GalNAca1-3GalNAcb-Sp8	2544.39	237.812	9.34655
199	Glcb1-4Glcb-Sp8	163.82	25.3441	15.4707		597	Neu5Aca2-3Galb1-4GlcNAcb1-3Galb1-4GlcNAcb1-6(Neu5Aca2-3Galb1-4GlcNAcb1-3Galb1-4GlcNAcb1-3)GalNAca-Sp14	2534.34	387.71	15.2982
25	(3S)Galb1-4Glcb-Sp8	162.614	19.3028	11.8703		596	GlcNAcb1-3Galb1-4GlcNAcb1-6(GlcNAcb1-3Galb1-4GlcNAcb1-3)GalNAca-Sp14	2513.52	319.302	12.7034
561	Gala1-3Galb1-4GlcNAcb1-2Mana1-6(Gala1-3Galb1-4GlcNAcb1-2Mana1-3)Manb1-4GlcNAcb1-4GlcNAc-Sp24	160.829	21.7185	13.5041		426	Gala1-3Galb1-3GlcNAcb1-3GalNAc-Sp14	2511.21	135.042	5.37758
222	Fuca1-2Galb1-4(6S)GlcNAcb-Sp8	156.758	24.1066	15.3782		481	Neu5Aca2-6Galb1-4GlcNAcb1-6GalNAca-Sp14	2506.37	189.679	7.56789
80	Fuca1-3GlcNAcb-Sp8	156.069	28.4792	18.2478		376	Fuca1-4(Fuca1-2Galb1-3)GlcNAcb1-2Mana1-3(Fuca1-4(Fuca1-2Galb1-3)GlcNAcb1-2Mana1-3)Manb1-4GlcNAcb1-4GlcNAcb-Sp19	2464.1	224.223	9.09959
307	GalNAcb1-3Galb-Sp8	154.97	50.9954	32.9066		203	GlcAb-Sp8	2460.03	84.6839	3.44239
198	Glca1-6Glca1-6Glcb-Sp8	152.749	24.3429	15.9366		49	Neu5,9Ac2a2-6Galb1-4GlcNAcb-Sp8	2458.03	109.776	4.46599
176	GlcNAcb1-2Galb1-3GalNAca-Sp8	151.812	50.019	32.948		9	Neu5Aca-Sp8	2430.76	418.707	17.2254
205	GlcAb1-6Galb-Sp8	151.369	35.7553	23.6212		359	KDNa2-3Galb1-4Glc-Sp0	2399	215.249	8.97247
522	Gala1-3Galb1-4GlcNAcb1-2Mana-Sp0	150.708	39.547	26.2408		486	Galb1-4GlcNAcb1-6(Galb1-4GlcNAcb1-2)Mana1-6(Galb1-4GlcNAcb1-2Mana1-3)Manb1-4GlcNAcb1-4(Fuca1-6)GlcNAcb-Sp24	2374	210.952	8.88592
180	GlcNAcb1-3GalNAca-Sp8	150.65	34.4696	22.8806		387	Galb1-3GlcNAcb1-3Galb1-4(Fuca1-3)GlcNAcb1-6(Galb1-3GlcNAcb1-3)Galb1-4Glc-Sp21	2356.01	290.133	12.3146
154	Galb1-4(Fuca1-3)GlcNAcb1-3Galb1-4(Fuca1-3)GlcNAcb-Sp0	146.212	27.7593	18.9857		503	Neu5Aca2-6GalNAcb1-4(6S)GlcNAcb-Sp8	2353.61	448.029	19.0358
245	Neu5Aca2-6(Neu5Aca2-3Galb1-3)GalNAca-Sp14	145.049	18.9894	13.0917		471	Glca1-4Glca1-4Glca1-4Glcb-Sp10	2330.77	116.181	4.98466
117	Gala1-3Galb1-4Glcb-Sp0	144.582	12.0439	8.33017		289	Neu5Aca2-3Galb1-4GlcNAcb1-6(Galb1-3)GalNAca-Sp14	2325.64	269.921	11.6063
396	Gala1-3Galb1-3(Fuca1-4)GlcNAcb1-2Mana1-6(Gala1-3Galb1-3(Fuca1-4)GlcNAcb1-2Mana1-3)Manb1-4GlcNAcb1-4GlcNAc-Sp19	144.269	16.5813	11.4933		201	G-ol-Sp8	2323.85	177.206	7.62555
566	Galb1-4GlcNAcb1-3Galb1-4GlcNAcb1-3Galb1-4GlcNAcb1-3Galb1-4GlcNAcb1-3Galb1-4GlcNAcb1-2Mana1-6(Galb1-4GlcNAcb1-3Galb1-4GlcNAcb1-3Galb1-4GlcNAcb1-3Galb1-4GlcNAcb1-3Galb1-4GlcNAcb1-2Mana1-3)Manb1-4GlcNAcb1-4GlcNAcb-Sp25	142.381	12.9229	9.07631		497	Galb1-4(Fuca1-3)GlcNAcb1-2Mana-Sp0	2323.55	87.9758	3.78626
602	Neu5Aca2-6Galb1-4GlcNAcb1-3Galb1-4GlcNAcb1-6(Galb1-3)GalNAca-Sp14	142.068	27.4374	19.3129		522	Gala1-3Galb1-4GlcNAcb1-2Mana-Sp0	2316.84	371.252	16.0241
495	Fuca1-2Galb1-4GlcNAcb1-6GalNAca-Sp14	141.948	23.9544	16.8756		573	Galb1-3GlcNAcb1-3Galb1-4GlcNAcb1-6(Galb1-3GlcNAcb1-3Galb1-4GlcNAb1-2)Mana1-6(Galb1-3GlcNAcb1-3Galb1-4GlcNAcb1-2Mana1-3)Manb1-4GlcNAcb1-4(Fuca1-6)GlcNAcb-Sp24	2306.91	266.233	11.5406
120	Gala1-4(Fuca1-2)Galb1-4GlcNAcb-Sp8	141.697	26.411	18.6391		519	(6P)Galb1-4GlcNAcb-SP0	2301.69	431.305	18.7386
43	(6S)Galb1-4Glcb-Sp8	141.131	28.1091	19.9171		566	Galb1-4GlcNAcb1-3Galb1-4GlcNAcb1-3Galb1-4GlcNAcb1-3Galb1-4GlcNAcb1-3Galb1-4GlcNAcb1-2Mana1-6(Galb1-4GlcNAcb1-3Galb1-4GlcNAcb1-3Galb1-4GlcNAcb1-3Galb1-4GlcNAcb1-3Galb1-4GlcNAcb1-2Mana1-3)Manb1-4GlcNAcb1-4GlcNAcb-Sp25	2258.18	97.0847	4.29924
440	Galb1-4Galb-Sp10	140.663	29.5329	20.9954		93	GalNAca1-3Galb-Sp8	2248.03	142.305	6.33019
500	Fuca1-2Galb1-4GlcNAcb1-2Mana-Sp0	140.307	20.907	14.9009		451	Gala1-3(Fuca1-2)Galb1-4GlcNAcb1-6(Gala1-3(Fuca1-2)Galb1-4GlcNAcb1-3)GalNAc-Sp14	2238.5	93.3739	4.17128
197	Glca1-4Glca-Sp8	140.077	28.0021	19.9905		168	Galb1-4GlcNAcb1-6(Galb1-3)GalNAc-Sp14	2201.35	79.4773	3.61039
289	Neu5Aca2-3Galb1-4GlcNAcb1-6(Galb1-3)GalNAca-Sp14	139.477	15.9922	11.4658		366	Fuca1-4(Galb1-3)GlcNAcb1-2Mana1-6(Fuca1-4(Galb1-3)GlcNAcb1-2Mana1-3)Manb1-4GlcNAcb1-4(Fuca1-6)GlcNAcb-Sp22	2190.04	284.953	13.0113
213	Mana1-2Mana1-6(Mana1-2Mana1-3)Mana1-6(Mana1-2Mana1-2Mana1-3)Manb1-4GlcNAcb1-4GlcNAcb-Sp12	137.302	19.2602	14.0276		360	KDNa2-3Galb1-3GalNAca-Sp14	2156.32	558.128	25.8834
18	GlcN(Gc)b-Sp8	137.009	17.1188	12.4946		327	Neu5Aca2-3Galb1-4GlcNAcb1-2Mana1-6(Neu5Aca2-6Galb1-4GlcNAcb1-2Mana1-3)Manb1-4GlcNAcb1-4GlcNAcb-Sp12	2140.29	186.49	8.7133
481	Neu5Aca2-6Galb1-4GlcNAcb1-6GalNAca-Sp14	136.063	27.8507	20.469		354	Galb1-4GlcNAcb1-2Mana1-6(Galb1-4GlcNAcb1-2Mana1-3)Manb1-4GlcNAcb1-4(Fuca1-6)GlcNAcb-Sp22	2134.31	317.301	14.8667
397	Neu5Aca2-3Galb1-3GlcNAcb1-2Mana1-6(Neu5Aca2-3Galb1-3GlcNAcb1-2Mana1-3)Manb1-4GlcNAcb1-4GlcNAc-Sp19	135.93	14.7436	10.8465		374	GalNAca1-3(Fuca1-2)Galb1-3GlcNAcb1-2Mana1-6(GalNAca1-3(Fuca1-2)Galb1-3GlcNAcb1-2Mana1-3)Manb1-4GlcNAcb1-4GlcNAcb-Sp20	2100.62	64.4261	3.067
596	GlcNAcb1-3Galb1-4GlcNAcb1-6(GlcNAcb1-3Galb1-4GlcNAcb1-3)GalNAca-Sp14	134.375	10.6126	7.89779		325	Galb1-3GlcNAcb1-2Mana1-6(Galb1-3GlcNAcb1-2Mana1-3)Manb1-4GlcNAcb1-4GlcNAcb-Sp19	2086.53	59.2754	2.84086
204	GlcAb1-3Galb-Sp8	133.617	20.9797	15.7013		363	Fuca1-2Galb1-4(Fuca1-3)GlcNAcb1-2Mana1-6(Fuca1-2Galb1-4(Fuca1-3)GlcNAcb1-2Mana1-3)Manb1-4GlcNAcb1-4GlcNAb-Sp20	2067.98	197.687	9.55944
380	GalNAcb1-4GlcNAcb1-2Mana1-6(GalNAcb1-4GlcNAcb1-2Mana1-3)Manb1-4GlcNAcb1-4GlcNAc-Sp12	132.35	23.0986	17.4527		213	Mana1-2Mana1-6(Mana1-2Mana1-3)Mana1-6(Mana1-2Mana1-2Mana1-3)Manb1-4GlcNAcb1-4GlcNAcb-Sp12	2064.19	98.6443	4.77884
107	Gala1-3(Fuca1-2)Galb1-4Glcb-Sp0	130.593	23.8198	18.2397		561	Gala1-3Galb1-4GlcNAcb1-2Mana1-6(Gala1-3Galb1-4GlcNAcb1-2Mana1-3)Manb1-4GlcNAcb1-4GlcNAc-Sp24	2062.3	195.853	9.49683
487	Neu5Aca2-3Galb1-3GlcNAcb1-2Mana1-6(GlcNAcb1-4)(Neu5Aca2-3Galb1-3GlcNAcb1-2Mana1-3)Manb1-4GlcNAcb1-4GlcNAc-Sp21	129.756	28.1347	21.6828		546	GlcNAcb1-3Galb1-4GlcNAcb1-3Galb1-4GlcNAcb1-2Mana1-6(GlcNAcb1-3Galb1-4GlcNAcb1-3Galb1-4GlcNAcb1-2Mana1-3)Manb1-4GlcNAcb1-4GlcNAcb-Sp12	2060.04	135.814	6.59278
497	Galb1-4(Fuca1-3)GlcNAcb1-2Mana-Sp0	128.207	3.85444	3.00643		523	Gala1-3(Fuca1-2)Galb1-4GlcNAcb1-2Mana-Sp0	2056.12	296.024	14.3972
310	GlcNAcb1-3Man-Sp10	127.411	26.0232	20.4246		187	GlcNAcb1-4-MDPLys	2051.47	199.424	9.72104
119	Gala1-3Galb-Sp8	126.945	27.9293	22.0011		136	Neu5Aca2-6(Galb1-3)GalNAca-Sp8	2050.72	116.866	5.69878
9	Neu5Aca-Sp8	125.981	20.6391	16.3827		78	Fuca1-2Galb1-4Glcb-Sp0	2043.46	111.192	5.44134
11	Neu5Acb-Sp8	125.79	37.0379	29.4443		470	Glca1-6Glca1-6Glca1-6Glcb-Sp10	2040.66	202.382	9.91748
145	Galb1-3GalNAcb1-4(Neu5Aca2-3)Galb1-4Glcb-Sp0	125.519	5.83818	4.65124		450	Fuca1-2Galb1-4GlcNAcb1-6(Fuca1-2Galb1-4GlcNAcb1-3)GalNAc-Sp14	2028	42.5962	2.1004
521	Neu5Aca2-6Galb1-4GlcNAcb1-2Man-Sp0	125.398	10.2242	8.15341		222	Fuca1-2Galb1-4(6S)GlcNAcb-Sp8	2027.08	80.2007	3.95647
42	(6S)Galb1-4Glcb-Sp0	125.391	30.8572	24.6087		473	Fuca1-2Galb1-4(Fuca1-3)GlcNAcb1-2Mana1-6(Fuca1-2Galb1-4(Fuca1-3)GlcNAcb1-2Mana1-3)Manb1-4GlcNAcb1-4(Fuca1-6)GlcNAcb-Sp24	2019.99	110.029	5.44703
360	KDNa2-3Galb1-3GalNAca-Sp14	122.776	62.4541	50.8681		565	GlcNAcb1-3Galb1-4GlcNAcb1-3Galb1-4GlcNAcb1-3Galb1-4GlcNAcb1-3Galb1-4GlcNAcb1-2Mana1-6(GlcNAcb1-3Galb1-4GlcNAcb1-3Galb1-4GlcNAcb1-3Galb1-4GlcNAcb1-3Galb1-4GlcNAcb1-2Mana1-3)Manb1-4GlcNAcb1-4GlcNAcb-Sp25	2007.72	78.7495	3.92233
168	Galb1-4GlcNAcb1-6(Galb1-3)GalNAc-Sp14	122.655	20.459	16.6802		361	Fuca1-2Galb1-3GlcNAcb1-2Mana1-6(Fuca1-2Galb1-3GlcNAcb1-2Mana1-3)Manb1-4GlcNAcb1-4GlcNAcb-Sp20	2000.77	98.4053	4.91837
470	Glca1-6Glca1-6Glca1-6Glcb-Sp10	122.595	17.3068	14.117		116	Gala1-3Galb1-4GlcNAcb-Sp8	1992.73	103.765	5.20719
570	(3S)GlcAb1-3Galb1-4GlcNAcb1-3Galb1-4Glc-Sp0	120.973	25.6287	21.1855		425	GalNAca1-3(Fuca1-2)Galb1-3GlcNAcb1-3GalNAc-Sp14	1982.78	94.5764	4.7699
170	Galb1-4GlcNAcb-Sp8	120.632	18.013	14.9322		288	Neu5Gca-Sp8	1962.49	230.005	11.7201
35	(3S)Galb1-4(6S)GlcNAcb-Sp8	119.75	28.2633	23.6019		526	Gala1-3(Fuca1-2)Galb1-3GlcNAcb1-6GalNAc-Sp14	1959.56	196.121	10.0085
392	Galb1-3GlcNAcb1-3GalNAca-Sp14	119.748	20.8504	17.4119		332	Neu5Aca2-3Galb1-3(Fuca1-4)GlcNAcb1-3Galb1-3(Fuca1-4)GlcNAcb-Sp0	1954.45	13.6049	0.696098
546	GlcNAcb1-3Galb1-4GlcNAcb1-3Galb1-4GlcNAcb1-2Mana1-6(GlcNAcb1-3Galb1-4GlcNAcb1-3Galb1-4GlcNAcb1-2Mana1-3)Manb1-4GlcNAcb1-4GlcNAcb-Sp12	119.493	7.1908	6.01775		447	Fuca1-2Galb1-4(Fuca1-3)GlcNAcb1-2Mana1-6(Fuca1-2Galb1-4(Fuca1-3)GlcNAcb1-4(Fuca1-2Galb1-4(Fuca1-3)GlcNAcb1-2)Mana1-3)Manb1-4GlcNAcb1-4GlcNAcb-Sp12	1949.83	149.586	7.67177
474	Fuca1-2Galb1-3(Fuca1-4)GlcNAcb1-2Mana1-6(Fuca1-2Galb1-3(Fuca1-4)GlcNAcb1-2Mana1-3)Manb1-4GlcNAcb1-4(Fuca1-6)GlcNAcb1-4(Fuca1-6)GlcNAcb-Sp19	119.447	25.6641	21.4858		551	Galb1-4GlcNAcb1-3Galb1-4GlcNAcb1-3Galb1-4GlcNAcb1-3Galb1-4GlcNAcb1-2Mana1-6(Galb1-4GlcNAcb1-3Galb1-4GlcNAcb1-3Galb1-4GlcNAcb1-3Galb1-4GlcNAcb1-2Mana1-3)Manb1-4GlcNAcb1-4GlcNAcb-Sp25	1940.03	205.659	10.6008
451	Gala1-3(Fuca1-2)Galb1-4GlcNAcb1-6(Gala1-3(Fuca1-2)Galb1-4GlcNAcb1-3)GalNAc-Sp14	118.544	9.87774	8.33252		474	Fuca1-2Galb1-3(Fuca1-4)GlcNAcb1-2Mana1-6(Fuca1-2Galb1-3(Fuca1-4)GlcNAcb1-2Mana1-3)Manb1-4GlcNAcb1-4(Fuca1-6)GlcNAcb1-4(Fuca1-6)GlcNAcb-Sp19	1926.6	108.968	5.65599
382	Galb1-3GalNAca1-3(Fuca1-2)Galb1-4GlcNAc-Sp0	116.232	49.4446	42.5394		356	(6S)GlcNAcb1-3Galb1-4GlcNAcb-Sp0	1920.44	108.271	5.63784
366	Fuca1-4(Galb1-3)GlcNAcb1-2Mana1-6(Fuca1-4(Galb1-3)GlcNAcb1-2Mana1-3)Manb1-4GlcNAcb1-4(Fuca1-6)GlcNAcb-Sp22	115.869	21.5798	18.6243		504	GalNAcb1-4(Fuca1-3)(6S)GlcNAcb-Sp8	1903.44	59.1297	3.10647
26	(3S)Galb1-4(6S)Glcb-Sp0	115.564	23.3784	20.2298		145	Galb1-3GalNAcb1-4(Neu5Aca2-3)Galb1-4Glcb-Sp0	1899.87	73.8848	3.88894
108	Gala1-3(Fuca1-2)Galb-Sp8	114.731	24.9064	21.7086		11	Neu5Acb-Sp8	1899.86	91.0818	4.79414
569	Galb1-4GlcNAcb1-3Galb1-4GlcNAcb1-3Galb1-4GlcNAcb1-3Galb1-4GlcNAcb1-3Galb1-4GlcNAcb1-3Galb1-4GlcNAcb1-2Mana1-6(Galb1-4GlcNAcb1-3Galb1-4GlcNAcb1-3Galb1-4GlcNAcb1-3Galb1-4GlcNAcb1-3Galb1-4GlcNAcb1-3Galb1-4GlcNAcb1-2Mana1-3)Manb1-4GlcNAcb1-4GlcNAcb-Sp25	114.164	11.1634	9.77842		449	Galb1-4GlcNAcb1-2Mana-Sp0	1896.22	36.948	1.94851
47	(6S)GlcNAcb-Sp8	113.859	27.6901	24.3197		607	Neu5Aca2-6Galb1-4GlcNAcb1-3Galb1-4GlcNAcb1-3Galb1-4GlcNAcb1-2Mana1-6(Neu5Aca2-6Galb1-4GlcNAcb1-3Galb1-4GlcNAcb1-3Galb1-4GlcNAcb1-2Mana1-3)Manb1-4GlcNAcb1-4GlcNAcb-Sp12	1887.12	141.751	7.51146
327	Neu5Aca2-3Galb1-4GlcNAcb1-2Mana1-6(Neu5Aca2-6Galb1-4GlcNAcb1-2Mana1-3)Manb1-4GlcNAcb1-4GlcNAcb-Sp12	112.155	3.12746	2.78851		590	Galb1-4GlcNAcb1-3Galb1-4GlcNAcb1-3GalNAca-Sp14	1879.85	219.385	11.6703
455	GalNAca1-3(Fuca1-2)Galb1-4GlcNAcb1-2Mana1-6(GalNAca1-3(Fuca1-2)Galb1-4GlcNAcb1-2Mana1-3)Manb1-4GlcNAcb1-4(Fuca1-6)GlcNAcb-Sp22	111.784	17.0544	15.2565		205	GlcAb1-6Galb-Sp8	1878.29	167.135	8.89824
486	Galb1-4GlcNAcb1-6(Galb1-4GlcNAcb1-2)Mana1-6(Galb1-4GlcNAcb1-2Mana1-3)Manb1-4GlcNAcb1-4(Fuca1-6)GlcNAcb-Sp24	111.385	14.8172	13.3027		315	Mana1-6(Mana1-3)Mana1-6(Mana1-3)Manb-Sp10	1875.82	70.6308	3.76533
395	Gala1-3Galb1-3GlcNAcb1-2Mana1-6(Gala1-3Galb1-3GlcNAcb1-2Mana1-3)Manb1-4GlcNAcb1-4GlcNAc-Sp19	111.071	9.60418	8.64691		66	Fuca1-2Galb1-3GlcNAcb1-3Galb1-4Glcb-Sp8	1869.72	128.107	6.85168
471	Glca1-4Glca1-4Glca1-4Glcb-Sp10	111.019	33.0647	29.783		440	Galb1-4Galb-Sp10	1863.19	72.317	3.88135
456	Gala1-3(Fuca1-2)Galb1-3GlcNAcb1-2Mana1-6(Gala1-3(Fuca1-2)Galb1-3GlcNAcb1-2Mana1-3)Manb1-4GlcNAcb1-4(Fuca1-6)GlcNAcb-Sp22	110.694	19.3975	17.5235		411	Galb1-4GlcNAcb1-6(Neu5Aca2-6Galb1-3GlcNAcb1-3)Galb1-4Glc-Sp21	1837.34	58.9601	3.209
357	KDNa2-3Galb1-4(Fuca1-3)GlcNAc-Sp0	110.635	21.2169	19.1774		95	GalNAcb1-3GalNAca-Sp8	1835.73	31.2422	1.70189
335	GalNAcb1-3Gala1-4Galb1-4GlcNAcb1-3Galb1-4Glcb-Sp0	110.283	16.7474	15.1859		176	GlcNAcb1-2Galb1-3GalNAca-Sp8	1833.43	258.46	14.0971
178	GlcNAcb1-6(GlcNAcb1-3)GalNAca-Sp14	110.049	31.5675	28.6849		424	Gala1-3(Fuca1-2)Galb1-3GlcNAcb1-3GalNAc-Sp14	1827.58	58.6285	3.20799
78	Fuca1-2Galb1-4Glcb-Sp0	109.63	21.778	19.865		196	Glca1-4Glcb-Sp8	1775.72	124.693	7.02212
565	GlcNAcb1-3Galb1-4GlcNAcb1-3Galb1-4GlcNAcb1-3Galb1-4GlcNAcb1-3Galb1-4GlcNAcb1-2Mana1-6(GlcNAcb1-3Galb1-4GlcNAcb1-3Galb1-4GlcNAcb1-3Galb1-4GlcNAcb1-3Galb1-4GlcNAcb1-2Mana1-3)Manb1-4GlcNAcb1-4GlcNAcb-Sp25	108.826	10.436	9.58962		380	GalNAcb1-4GlcNAcb1-2Mana1-6(GalNAcb1-4GlcNAcb1-2Mana1-3)Manb1-4GlcNAcb1-4GlcNAc-Sp12	1772.03	112.46	6.34643
428	Gala1-3(Fuca1-2)Galb1-4GlcNAcb1-2Mana1-6(Gala1-3(Fuca1-2)Galb1-4GlcNAcb1-2Mana1-3)Manb1-4GlcNAcb1-4(Fuca1-6)GlcNAcb-Sp22	108.53	17.6474	16.2604		170	Galb1-4GlcNAcb-Sp8	1770.69	193.235	10.913
523	Gala1-3(Fuca1-2)Galb1-4GlcNAcb1-2Mana-Sp0	107.977	18.6431	17.2657		157	Galb1-4(6S)Glcb-Sp8	1746.69	144.593	8.27811
494	Galb1-4(Fuca1-3)GlcNAcb1-6(Neu5Aca2-6(Neu5Aca2-3Galb1-3)GlcNAcb1-3)Galb1-4Glc-Sp21	107.568	16.099	14.9663		4	GalNAca-Sp8	1742.39	280.267	16.0852
391	Fuca1-2Galb1-3GalNAca1-3(Fuca1-2)Galb1-4GlcNAcb-Sp0	106.215	28.4851	26.8182		601	Neu5Aca2-3Galb1-4GlcNAcb1-3Galb1-4GlcNAcb1-6(Galb1-3)GalNAca-Sp14	1731.46	180.414	10.4198
519	(6P)Galb1-4GlcNAcb-SP0	106.141	23.1903	21.8486		564	GalNAcb1-4GlcNAcb1-3GalNAcb1-4GlcNAcb-Sp0	1699.69	147.855	8.69889
38	(3S)Galb-Sp8	105.61	33.4521	31.6752		488	Neu5Aca2-6Galb1-4GlcNAcb1-6(Fuca1-2Galb1-4(Fuca1-3)GlcNAcb1-3)Galb1-4Glc-Sp21	1681.03	91.0034	5.41355
424	Gala1-3(Fuca1-2)Galb1-3GlcNAcb1-3GalNAc-Sp14	104.206	5.51522	5.29263		469	Gala1-3(Fuca1-2)Galb1-3GalNAcb-Sp8	1678.69	121.136	7.21613
394	GalNAca1-3(Fuca1-2)Galb1-3GalNAca1-3(Fuca1-2)Galb1-4GlcNAcb-Sp0	103.97	20.4787	19.6967		142	Galb1-3GalNAca-Sp16	1662.64	68.3998	4.11392
334	Gala1-4Galb1-4GlcNAcb1-3Galb1-4Glcb-Sp0	102.857	8.91592	8.66829		18	GlcN(Gc)b-Sp8	1649.28	144.741	8.77601
485	Mana1-6(Mana1-3)Manb1-4GlcNAcb1-4(Fuca1-6)GlcNAcb-Sp19	102.089	12.7792	12.5176		285	Neu5Gca2-3Galb1-4Glcb-Sp0	1646.58	167.149	10.1513
590	Galb1-4GlcNAcb1-3Galb1-4GlcNAcb1-3GalNAca-Sp14	101.848	18.3305	17.9978		45	(6S)Galb1-4(6S)Glcb-Sp8	1638.63	216.618	13.2195
591	Galb1-4GlcNAcb1-3Galb1-4GlcNAcb1-6(Galb1-3)GalNAca-Sp14	101.493	19.2166	18.9339		459	Galb1-4GlcNAcb1-6(Galb1-4GlcNAcb1-2)Mana1-6(Galb1-4GlcNAcb1-2Mana1-3)Manb1-4GlcNAcb1-4GlcNAcb-Sp19	1630.94	169.28	10.3793
59	Fuca1-2Galb1-3GalNAcb1-3Gala-Sp9	100.35	42.2811	42.1336		378	Neu5Aca2-6Galb1-4GlcNAcb1-3GalNAc-Sp14	1624.14	158.412	9.75358
504	GalNAcb1-4(Fuca1-3)(6S)GlcNAcb-Sp8	98.9751	55.8066	56.3844		38	(3S)Galb-Sp8	1624.07	134.63	8.28965
45	(6S)Galb1-4(6S)Glcb-Sp8	98.825	15.9974	16.1876		603	Neu5Aca2-6Galb1-4GlcNAcb1-6(Galb1-3)GalNAca-Sp14	1605.34	92.8948	5.78662
285	Neu5Gca2-3Galb1-4Glcb-Sp0	98.6494	22.528	22.8364		396	Gala1-3Galb1-3(Fuca1-4)GlcNAcb1-2Mana1-6(Gala1-3Galb1-3(Fuca1-4)GlcNAcb1-2Mana1-3)Manb1-4GlcNAcb1-4GlcNAc-Sp19	1603.15	51.9995	3.24359
446	Fuca1-2Galb1-4 GlcNAcb1-2Mana1-6(Fuca1-2Galb1-4GlcNAcb1-2(Fuca1-2Galb1-4GlcNAcb1-4)Mana1-3)Manb1-4GlcNAcb1-4GlcNAcb-Sp12	97.2271	15.3	15.7364		502	Fuca1-2(6S)Galb1-3(6S)GlcNAcb-Sp0	1591.48	83.1477	5.22455
340	GlcNAca1-4Galb1-4GlcNAcb-Sp0	96.9661	8.62283	8.89263		108	Gala1-3(Fuca1-2)Galb-Sp8	1576.38	105.938	6.72033
363	Fuca1-2Galb1-4(Fuca1-3)GlcNAcb1-2Mana1-6(Fuca1-2Galb1-4(Fuca1-3)GlcNAcb1-2Mana1-3)Manb1-4GlcNAcb1-4GlcNAb-Sp20	96.9174	33.2728	34.3311		210	Mana1-2Mana1-3Mana-Sp9	1575.94	114.389	7.2585
502	Fuca1-2(6S)Galb1-3(6S)GlcNAcb-Sp0	96.3856	4.70087	4.87715		43	(6S)Galb1-4Glcb-Sp8	1568.27	182.5	11.637
158	Galb1-4GalNAca1-3(Fuca1-2)Galb1-4GlcNAcb-Sp8	95.1859	16.5187	17.3542		518	Galb1-4(6P)GlcNAcb-Sp0	1560.74	400.146	25.6383
607	Neu5Aca2-6Galb1-4GlcNAcb1-3Galb1-4GlcNAcb1-3Galb1-4GlcNAcb1-2Mana1-6(Neu5Aca2-6Galb1-4GlcNAcb1-3Galb1-4GlcNAcb1-3Galb1-4GlcNAcb1-2Mana1-3)Manb1-4GlcNAcb1-4GlcNAcb-Sp12	94.7424	11.5873	12.2303		517	(4S)GalNAcb-Sp10	1551.97	247.972	15.9779
315	Mana1-6(Mana1-3)Mana1-6(Mana1-3)Manb-Sp10	94.4613	37.4888	39.6869		362	Fuca1-2Galb1-4GlcNAcb1-2Mana1-6(Fuca1-2Galb1-4GlcNAcb1-2Mana1-3)Manb1-4GlcNAcb1-4GlcNAcb-Sp20	1526.69	94.3915	6.18277
376	Fuca1-4(Fuca1-2Galb1-3)GlcNAcb1-2Mana1-3(Fuca1-4(Fuca1-2Galb1-3)GlcNAcb1-2Mana1-3)Manb1-4GlcNAcb1-4GlcNAcb-Sp19	93.4671	6.18104	6.61306		437	Galb1-4GlcNAcb1-2Mana1-6(GlcNAcb1-4)(Galb1-4GlcNAcb1-4(Galb1-4GlcNAcb1-2)Mana1-3)Manb1-4GlcNAcb1-4GlcNAc-Sp21	1522.37	45.8617	3.01251
361	Fuca1-2Galb1-3GlcNAcb1-2Mana1-6(Fuca1-2Galb1-3GlcNAcb1-2Mana1-3)Manb1-4GlcNAcb1-4GlcNAcb-Sp20	93.3346	12.1076	12.9722		609	Neu5Aca2-6Galb1-4GlcNAcb1-3Galb1-4GlcNAcb1-2Mana1-6(Neu5Aca2-6Galb1-4GlcNAcb1-3Galb1-4GlcNAcb1-2Mana1-3)Manb1-4GlcNAcb1-4GlcNAcb-Sp12	1508.16	95.6115	6.33961
469	Gala1-3(Fuca1-2)Galb1-3GalNAcb-Sp8	91.0255	22.5369	24.7589		412	Galb1-3GalNAcb1-4(Neu5Aca2-8Neu5Aca2-3)Galb1-4Glcb-Sp0	1503.64	150.111	9.98322
93	GalNAca1-3Galb-Sp8	90.6621	5.56911	6.14271		562	GlcNAcb1-3Galb1-4GlcNAcb1-6(GlcNAcb1-3Galb1-3)GalNAca-Sp14	1494.44	117.621	7.87056
412	Galb1-3GalNAcb1-4(Neu5Aca2-8Neu5Aca2-3)Galb1-4Glcb-Sp0	90.4878	12.7215	14.0588		487	Neu5Aca2-3Galb1-3GlcNAcb1-2Mana1-6(GlcNAcb1-4)(Neu5Aca2-3Galb1-3GlcNAcb1-2Mana1-3)Manb1-4GlcNAcb1-4GlcNAc-Sp21	1492.82	74.6622	5.00143
77	Fuca1-2Galb1-4GlcNAcb-Sp8	89.717	11.2396	12.5278		42	(6S)Galb1-4Glcb-Sp0	1484.57	110.565	7.44762
165	Galb1-4GlcNAcb1-3Galb1-4Glcb-Sp0	89.6854	19.2985	21.518		375	Gala1-3(Fuca1-2)Galb1-3GlcNAcb1-2Mana1-6(Gala1-3(Fuca1-2)Galb1-3GlcNAcb1-2Mana1-3)Manb1-4GlcNAcb1-4GlcNAcb-Sp20	1483.61	55.7162	3.75545
375	Gala1-3(Fuca1-2)Galb1-3GlcNAcb1-2Mana1-6(Gala1-3(Fuca1-2)Galb1-3GlcNAcb1-2Mana1-3)Manb1-4GlcNAcb1-4GlcNAcb-Sp20	89.5122	14.7309	16.4568		401	Fuca1-2Galb1-4GlcNAcb1-3GalNAca-Sp14	1477.92	89.2554	6.03924
328	Galb1-4(Fuca1-3)GlcNAcb1-2Mana1-6(Galb1-4(Fuca1-3)GlcNAcb1-2Mana1-3)Manb1-4GlcNAcb1-4GlcNAcb-Sp20	89.5034	13.5494	15.1385		328	Galb1-4(Fuca1-3)GlcNAcb1-2Mana1-6(Galb1-4(Fuca1-3)GlcNAcb1-2Mana1-3)Manb1-4GlcNAcb1-4GlcNAcb-Sp20	1476.82	167.589	11.3479
447	Fuca1-2Galb1-4(Fuca1-3)GlcNAcb1-2Mana1-6(Fuca1-2Galb1-4(Fuca1-3)GlcNAcb1-4(Fuca1-2Galb1-4(Fuca1-3)GlcNAcb1-2)Mana1-3)Manb1-4GlcNAcb1-4GlcNAcb-Sp12	89.4534	10.0088	11.1889		117	Gala1-3Galb1-4Glcb-Sp0	1474.28	88.3587	5.99333
210	Mana1-2Mana1-3Mana-Sp9	89.2766	35.9754	40.2966		403	GalNAca1-3GalNAcb1-3Gala1-4Galb1-4GlcNAcb-Sp0	1466.71	49.6319	3.38389
160	Galb1-4GlcNAcb1-3GalNAca-Sp8	89.0784	39.3832	44.2119		495	Fuca1-2Galb1-4GlcNAcb1-6GalNAca-Sp14	1465.27	427.199	29.155
513	(6S)GalNAcb1-4GlcNAc-Sp8	88.6682	35.9346	40.527		218	Manb1-4GlcNAcb-Sp0	1462.23	486.726	33.2865
473	Fuca1-2Galb1-4(Fuca1-3)GlcNAcb1-2Mana1-6(Fuca1-2Galb1-4(Fuca1-3)GlcNAcb1-2Mana1-3)Manb1-4GlcNAcb1-4(Fuca1-6)GlcNAcb-Sp24	88.5334	16.7252	18.8913		59	Fuca1-2Galb1-3GalNAcb1-3Gala-Sp9	1460.42	36.7394	2.51567
354	Galb1-4GlcNAcb1-2Mana1-6(Galb1-4GlcNAcb1-2Mana1-3)Manb1-4GlcNAcb1-4(Fuca1-6)GlcNAcb-Sp22	88.359	38.4173	43.4786		611	Galb1-3GalNAcb1-4(Neu5Aca2-8Neu5Aca2-8Neu5Aca2-3)Galb1-4Glcb-Sp21	1456.6	291.203	19.992
450	Fuca1-2Galb1-4GlcNAcb1-6(Fuca1-2Galb1-4GlcNAcb1-3)GalNAc-Sp14	87.9754	19.4168	22.0707		357	KDNa2-3Galb1-4(Fuca1-3)GlcNAc-Sp0	1451.71	92.6642	6.3831
414	Gala1-3(Fuca1-2)Galb1-4GlcNAcb1-3GalNAca-Sp14	87.7257	20.9074	23.8328		415	GalNAca1-3(Fuca1-2)Galb1-4GlcNAcb1-3GalNAca-Sp14	1449.56	58.4791	4.03428
106	Gala1-3(Fuca1-2)Galb1-4GlcNAc-Sp0	87.655	44.8423	51.1578		311	GlcNAcb1-4GlcNAcb-Sp10	1430.79	123.446	8.62782
517	(4S)GalNAcb-Sp10	87.5946	40.9321	46.729		242	Neu5Aca2-3Galb1-4(Neu5Aca2-3Galb1-3)GlcNAcb-Sp8	1430.52	101.49	7.09464
401	Fuca1-2Galb1-4GlcNAcb1-3GalNAca-Sp14	87.2493	5.67666	6.50625		409	GalNAcb1-3Gala1-6Galb1-4Glcb-Sp8	1428.78	215.473	15.081
187	GlcNAcb1-4-MDPLys	87.1722	9.43011	10.8178		395	Gala1-3Galb1-3GlcNAcb1-2Mana1-6(Gala1-3Galb1-3GlcNAcb1-2Mana1-3)Manb1-4GlcNAcb1-4GlcNAc-Sp19	1425.58	25.8982	1.81668
551	Galb1-4GlcNAcb1-3Galb1-4GlcNAcb1-3Galb1-4GlcNAcb1-3Galb1-4GlcNAcb1-2Mana1-6(Galb1-4GlcNAcb1-3Galb1-4GlcNAcb1-3Galb1-4GlcNAcb1-3Galb1-4GlcNAcb1-2Mana1-3)Manb1-4GlcNAcb1-4GlcNAcb-Sp25	86.8985	17.5248	20.167		137	Neu5Aca2-6(Galb1-3)GalNAca-Sp14	1424.34	86.1392	6.04764
312	GlcNAcb1-4GlcNAcb-Sp12	86.8084	43.3101	49.8915		410	Gala1-3(Fuca1-2)Galb1-4(Fuca1-3)Glcb-Sp21	1419.69	167.153	11.7739
44	(6S)Galb1-4GlcNAcb-Sp8	86.3197	28.9289	33.5137		391	Fuca1-2Galb1-3GalNAca1-3(Fuca1-2)Galb1-4GlcNAcb-Sp0	1413.16	80.9574	5.72881
114	Gala1-3Galb1-4(Fuca1-3)GlcNAcb-Sp8	85.9106	37.3487	43.474		382	Galb1-3GalNAca1-3(Fuca1-2)Galb1-4GlcNAc-Sp0	1402.61	470.452	33.5411
297	4S(3S)Galb1-4GlcNAcb-Sp0	85.6609	11.3713	13.2748		312	GlcNAcb1-4GlcNAcb-Sp12	1399.29	116.173	8.30228
87	GalNAca1-3(Fuca1-2)Galb1-4GlcNAcb-Sp8	85.2277	7.27268	8.53323		47	(6S)GlcNAcb-Sp8	1392	107.557	7.72679
288	Neu5Gca-Sp8	85.194	22.3861	26.2766		133	Galb1-4GlcNAcb1-6GalNAc-Sp14	1387.99	65.676	4.73173
443	GalNAcb1-6GalNAcb-Sp8	85.0428	24.416	28.7102		7	Fuca-Sp9	1380.16	282.214	20.448
515	GalNAcb1-4(6S)GlcNAc-Sp8	85.0328	10.7694	12.665		8	Rhaa-Sp8	1379.55	44.4404	3.22137
217	Mana1-6(Mana1-3)Mana1-6(Mana1-3)Manb1-4GlcNAcb1-4GlcNAcb-Sp12	84.7527	48.9741	57.7848		406	Gala1-3Galb1-4GlcNAcb1-3GalNAca-Sp14	1377.68	132.901	9.64677
4	GalNAca-Sp8	83.4126	8.52534	10.2207		579	GlcNAcb1-3Galb1-4GlcNAcb1-3Galb1-4GlcNAcb1-3Galb1-4GlcNAcb1-2Mana1-6(GlcNAcb1-3Galb1-4GlcNAcb1-3Galb1-4GlcNAcb1-3Galb1-4GlcNAcb1-2Mana1-3)Manb1-4GlcNAcb1-4(Fuca1-6)GlcNAcb-Sp24	1370.4	96.5224	7.04335
399	Galb1-4GlcNAcb1-2Mana1-6(GlcNAcb1-2Mana1-3)Manb1-4GlcNAcb1-4GlcNAc-Sp12	82.0738	13.9704	17.0218		148	Galb1-3GlcNAcb1-3Galb1-4GlcNAcb-Sp0	1368.86	53.9754	3.94309
609	Neu5Aca2-6Galb1-4GlcNAcb1-3Galb1-4GlcNAcb1-2Mana1-6(Neu5Aca2-6Galb1-4GlcNAcb1-3Galb1-4GlcNAcb1-2Mana1-3)Manb1-4GlcNAcb1-4GlcNAcb-Sp12	81.5541	3.90049	4.78271		28	(3S)Galb1-3(Fuca1-4)GlcNAcb-Sp8	1367.47	47.9071	3.50333
37	(3S)Galb1-4GlcNAcb-Sp8	81.3897	34.079	41.8714		520	GalNAca1-3(Fuca1-2)Galb1-4GlcNAcb1-6GalNAc-Sp14	1358.37	123.952	9.12506
593	Neu5Aca2-3Galb1-4GlcNAcb1-3Galb1-4GlcNAcb1-3GalNAca-Sp14	81.3314	28.0069	34.4355		35	(3S)Galb1-4(6S)GlcNAcb-Sp8	1354.59	42.3521	3.12657
188	GlcNAcb1-6(GlcNAcb1-4)GalNAca-Sp8	81.3182	19.2175	23.6325		392	Galb1-3GlcNAcb1-3GalNAca-Sp14	1341.46	93.8358	6.99503
121	Gala1-4Galb1-4GlcNAcb-Sp0	81.295	49.5395	60.9379		443	GalNAcb1-6GalNAcb-Sp8	1330.23	145.534	10.9405
105	Gala1-3(Fuca1-2)Galb1-4(Fuca1-3)GlcNAcb-Sp8	81.198	15.529	19.1248		241	Neu5Aca2-3Galb1-3(Fuca1-4)GlcNAcb1-3Galb1-4(Fuca1-3)GlcNAcb-Sp0	1327.5	156.479	11.7875
580	Galb1-4GlcNAcb1-3Galb1-4GlcNAcb1-3Galb1-4GlcNAcb1-3Galb1-4GlcNAcb1-2Mana1-6(Galb1-4GlcNAcb1-3Galb1-4GlcNAcb1-3Galb1-4GlcNAcb1-3Galb1-4GlcNAcb1-2Mana1-3)Manb1-4GlcNAcb1-4(Fuca1-6)GlcNAcb-Sp24	81.1094	18.6484	22.9917		595	GlcNAcb1-3Galb1-4GlcNAcb1-6(Galb1-3)GalNAca-Sp14	1321.63	78.0561	5.90605
171	Galb1-4GlcNAcb-Sp23	80.4396	19.6282	24.4012		423	Fuca1-2Galb1-3GlcNAcb1-3GalNAc-Sp14	1318.65	180.019	13.6518
362	Fuca1-2Galb1-4GlcNAcb1-2Mana1-6(Fuca1-2Galb1-4GlcNAcb1-2Mana1-3)Manb1-4GlcNAcb1-4GlcNAcb-Sp20	79.6491	12.0672	15.1504		178	GlcNAcb1-6(GlcNAcb1-3)GalNAca-Sp14	1314.62	73.787	5.61282
415	GalNAca1-3(Fuca1-2)Galb1-4GlcNAcb1-3GalNAca-Sp14	79.2436	29.435	37.1449		89	GlcNAcb1-3Galb1-3GalNAca-Sp8	1314.6	112.578	8.56361
425	GalNAca1-3(Fuca1-2)Galb1-3GlcNAcb1-3GalNAc-Sp14	78.8368	22.8792	29.021		480	Neu5Aca2-3Galb1-4GlcNAcb1-6GalNAca-Sp14	1313.16	67.6221	5.14957
518	Galb1-4(6P)GlcNAcb-Sp0	78.5542	34.1783	43.5092		606	Neu5Aca2-6Galb1-4GlcNAcb1-3Galb1-4GlcNAcb1-6(Neu5Aca2-6Galb1-4GlcNAcb1-3Galb1-4GlcNAcb1-3)GalNAca-Sp14	1310.45	71.6361	5.46653
353	GlcNAcb1-2Mana1-6(GlcNAcb1-2Mana1-3)Manb1-4GlcNAcb1-4(Fuca1-6)GlcNAcb-Sp22	78.2578	39.255	50.1611		419	GalNAca1-3(Fuca1-2)Galb1-4(Fuca1-3)GlcNAcb1-3GalNAc-Sp14	1309	230.32	17.5951
575	GlcNAcb1-3Galb1-4GlcNAcb1-2Mana1-6(GlcNAcb1-3Galb1-4GlcNAcb1-2Mana1-3)Manb1-4GlcNAcb1-4(Fuca1-6)GlcNAcb-Sp24	77.8698	15.7369	20.2093		507	GalNAca1-3(Fuca1-2)Galb1-3GlcNAcb1-6GalNAca-Sp14	1306.1	112.998	8.65157
94	GalNAca1-4(Fuca1-2)Galb1-4GlcNAcb-Sp8	77.7477	20.7175	26.647		593	Neu5Aca2-3Galb1-4GlcNAcb1-3Galb1-4GlcNAcb1-3GalNAca-Sp14	1297.99	164.949	12.708
601	Neu5Aca2-3Galb1-4GlcNAcb1-3Galb1-4GlcNAcb1-6(Galb1-3)GalNAca-Sp14	77.1384	15.4269	19.999		569	Galb1-4GlcNAcb1-3Galb1-4GlcNAcb1-3Galb1-4GlcNAcb1-3Galb1-4GlcNAcb1-3Galb1-4GlcNAcb1-3Galb1-4GlcNAcb1-2Mana1-6(Galb1-4GlcNAcb1-3Galb1-4GlcNAcb1-3Galb1-4GlcNAcb1-3Galb1-4GlcNAcb1-3Galb1-4GlcNAcb1-3Galb1-4GlcNAcb1-2Mana1-3)Manb1-4GlcNAcb1-4GlcNAcb-Sp25	1296.56	55.4363	4.27566
20	Galb1-4GlcNAcb1-6(Galb1-4GlcNAcb1-3)GalNAc-Sp14	76.72	8.19517	10.6819		180	GlcNAcb1-3GalNAca-Sp8	1289.68	113.806	8.82431
449	Galb1-4GlcNAcb1-2Mana-Sp0	75.9292	23.4441	30.8763		494	Galb1-4(Fuca1-3)GlcNAcb1-6(Neu5Aca2-6(Neu5Aca2-3Galb1-3)GlcNAcb1-3)Galb1-4Glc-Sp21	1289.27	103.54	8.03093
606	Neu5Aca2-6Galb1-4GlcNAcb1-3Galb1-4GlcNAcb1-6(Neu5Aca2-6Galb1-4GlcNAcb1-3Galb1-4GlcNAcb1-3)GalNAca-Sp14	75.8481	15.5691	20.5266		304	GlcNAcb1-6(Galb1-4GlcNAcb1-3)Galb1-4GlcNAc-Sp0	1286.47	92.165	7.16416
113	Gala1-3GalNAcb-Sp8	75.6398	11.61	15.3491		439	Galb1-4GlcNAcb1-6(Galb1-4GlcNAcb1-2)Mana1-6(GlcNAcb1-4)(Galb1-4GlcNAcb1-4(Galb1-4GlcNAcb1-2)Mana1-3)Manb1-4GlcNAcb1-4GlcNAc-Sp21	1283.1	26.3027	2.04993
28	(3S)Galb1-3(Fuca1-4)GlcNAcb-Sp8	75.4743	10.2207	13.542		476	GlcNAcb1-6(GlcNAcb1-2)Mana1-6(GlcNAcb1-2Mana1-3)Manb1-4GlcNAcb1-4(Fuca1-6)GlcNAcb-Sp24	1271.91	38.893	3.05784
218	Manb1-4GlcNAcb-Sp0	75.2764	28.2675	37.5516		405	Gala1-4Galb1-4GlcNAcb1-2Mana1-6(Gala1-4Galb1-4GlcNAcb1-2Mana1-3)Manb1-4GlcNAcb1-4GlcNAcb-Sp24	1268.49	210.683	16.609
526	Gala1-3(Fuca1-2)Galb1-3GlcNAcb1-6GalNAc-Sp14	74.1989	18.7754	25.3041		10	Neu5Aca-Sp11	1265.81	270.663	21.3826
493	(3S)Galb1-3(Fuca1-4)GlcNAcb-Sp0	73.913	16.4793	22.2956		570	(3S)GlcAb1-3Galb1-4GlcNAcb1-3Galb1-4Glc-Sp0	1265.55	105.407	8.3289
611	Galb1-3GalNAcb1-4(Neu5Aca2-8Neu5Aca2-8Neu5Aca2-3)Galb1-4Glcb-Sp21	73.0985	14.0015	19.1542		263	Fuca1-2Galb1-4(6S)Glcb-Sp0	1252.57	195.319	15.5934
374	GalNAca1-3(Fuca1-2)Galb1-3GlcNAcb1-2Mana1-6(GalNAca1-3(Fuca1-2)Galb1-3GlcNAcb1-2Mana1-3)Manb1-4GlcNAcb1-4GlcNAcb-Sp20	72.774	12.6544	17.3887		122	Gala1-4Galb1-4GlcNAcb-Sp8	1248.39	185.038	14.8221
390	Fuca1-2Galb1-3GalNAca1-3(Fuca1-2)Galb1-4Glcb-Sp0	72.5255	15.3704	21.1931		379	Neu5Aca2-3Galb1-4(Fuca1-3)GlcNAcb1-3GalNAca-Sp14	1245.31	94.4252	7.58244
410	Gala1-3(Fuca1-2)Galb1-4(Fuca1-3)Glcb-Sp21	72.3456	9.53828	13.1843		540	GlcNAcb1-3Galb1-4GlcNAcb1-2Mana1-6(GlcNAcb1-3Galb1-4GlcNAcb1-2Mana1-3)Manb1-4GlcNAcb1-4GlcNAcb-Sp12	1245.18	122.601	9.84607
271	Neu5Aca2-6Galb1-4GlcNAcb1-3Galb1-4(Fuca1-3)GlcNAcb1-3Galb1-4(Fuca1-3)GlcNAcb-Sp0	72.1928	30.1086	41.7059		60	Fuca1-2Galb1-3GalNAcb1-3Gala1-4Galb1-4Glcb-Sp9	1240.53	89.4216	7.20833
520	GalNAca1-3(Fuca1-2)Galb1-4GlcNAcb1-6GalNAc-Sp14	72.1539	20.0267	27.7556		334	Gala1-4Galb1-4GlcNAcb1-3Galb1-4Glcb-Sp0	1222.62	120.702	9.87242
49	Neu5,9Ac2a2-6Galb1-4GlcNAcb-Sp8	71.795	15.3311	21.354		594	GlcNAcb1-3Galb1-4GlcNAcb1-3GalNAca-Sp14	1219.64	190.482	15.6179
89	GlcNAcb1-3Galb1-3GalNAca-Sp8	70.7513	9.48732	13.4094		119	Gala1-3Galb-Sp8	1219.4	67.9717	5.5742
379	Neu5Aca2-3Galb1-4(Fuca1-3)GlcNAcb1-3GalNAca-Sp14	70.6943	16.5101	23.3543		575	GlcNAcb1-3Galb1-4GlcNAcb1-2Mana1-6(GlcNAcb1-3Galb1-4GlcNAcb1-2Mana1-3)Manb1-4GlcNAcb1-4(Fuca1-6)GlcNAcb-Sp24	1215.64	57.5507	4.73419
263	Fuca1-2Galb1-4(6S)Glcb-Sp0	70.5465	20.9885	29.7513		313	MurNAcb1-4GlcNAcb-Sp10	1214.3	141.689	11.6684
579	GlcNAcb1-3Galb1-4GlcNAcb1-3Galb1-4GlcNAcb1-3Galb1-4GlcNAcb1-2Mana1-6(GlcNAcb1-3Galb1-4GlcNAcb1-3Galb1-4GlcNAcb1-3Galb1-4GlcNAcb1-2Mana1-3)Manb1-4GlcNAcb1-4(Fuca1-6)GlcNAcb-Sp24	70.0017	11.8298	16.8993		413	Neu5Aca2-3Galb1-3GalNAcb1-4(Neu5Aca2-8Neu5Aca2-3)Galb1-4Glcb-Sp0	1212.52	48.9603	4.03789
404	Gala1-4Galb1-3GlcNAcb1-2Mana1-6(Gala1-4Galb1-3GlcNAcb1-2Mana1-3)Manb1-4GlcNAcb1-4GlcNAcb-Sp19	70.0016	13.6503	19.5		580	Galb1-4GlcNAcb1-3Galb1-4GlcNAcb1-3Galb1-4GlcNAcb1-3Galb1-4GlcNAcb1-2Mana1-6(Galb1-4GlcNAcb1-3Galb1-4GlcNAcb1-3Galb1-4GlcNAcb1-3Galb1-4GlcNAcb1-2Mana1-3)Manb1-4GlcNAcb1-4(Fuca1-6)GlcNAcb-Sp24	1210.1	95.2122	7.86815
100	GalNAcb1-4GlcNAcb-Sp8	69.7337	7.61664	10.9225		385	Galb1-4GlcNAcb1-6(Fuca1-4(Fuca1-2Galb1-3)GlcNAcb1-3)Galb1-4Glc-Sp21	1208.95	107.154	8.8634
406	Gala1-3Galb1-4GlcNAcb1-3GalNAca-Sp14	69.7261	3.99963	5.73619		240	Neu5Aca2-3Galb1-3(Fuca1-4)GlcNAcb-Sp8	1206.84	104.29	8.64153
332	Neu5Aca2-3Galb1-3(Fuca1-4)GlcNAcb1-3Galb1-3(Fuca1-4)GlcNAcb-Sp0	69.6989	6.9177	9.92512		27	(3S)Galb1-4(6S)Glcb-Sp8	1204.79	136.922	11.3648
345	GlcNAca1-4Galb1-3GalNAc-Sp14	69.5557	19.9791	28.7239		377	Neu5Aca2-3Galb1-4GlcNAcb1-3GalNAc-Sp14	1203.77	142.91	11.8719
177	GlcNAcb1-6(GlcNAcb1-3)GalNAca-Sp8	69.234	25.6806	37.0924		515	GalNAcb1-4(6S)GlcNAc-Sp8	1200.91	59.5316	4.95723
514	(3S)GalNAcb1-4(3S)GlcNAc-Sp8	69.144	4.35041	6.29182		548	Galb1-4GlcNAcb1-3Galb1-4GlcNAcb1-3Galb1-4GlcNAcb1-2Mana1-6(Galb1-4GlcNAcb1-3Galb1-4GlcNAcb1-3Galb1-4GlcNAcb1-2Mana1-3)Manb1-4GlcNAcb1-4GlcNAcb-Sp12	1186.81	226.017	19.0442
7	Fuca-Sp9	68.98	17.8366	25.8576		114	Gala1-3Galb1-4(Fuca1-3)GlcNAcb-Sp8	1176.38	185.042	15.7298
439	Galb1-4GlcNAcb1-6(Galb1-4GlcNAcb1-2)Mana1-6(GlcNAcb1-4)(Galb1-4GlcNAcb1-4(Galb1-4GlcNAcb1-2)Mana1-3)Manb1-4GlcNAcb1-4GlcNAc-Sp21	68.7554	16.0582	23.3556		202	GlcAa-Sp8	1170.95	106.671	9.10977
403	GalNAca1-3GalNAcb1-3Gala1-4Galb1-4GlcNAcb-Sp0	68.6413	12.0676	17.5807		452	GalNAca1-3(Fuca1-2)Galb1-4GlcNAcb1-6(GalNAca1-3(Fuca1-2)Galb1-4GlcNAcb1-3)GalNAc-Sp14	1170.7	152.266	13.0064
540	GlcNAcb1-3Galb1-4GlcNAcb1-2Mana1-6(GlcNAcb1-3Galb1-4GlcNAcb1-2Mana1-3)Manb1-4GlcNAcb1-4GlcNAcb-Sp12	68.6346	3.32349	4.8423		345	GlcNAca1-4Galb1-3GalNAc-Sp14	1155.95	12.7247	1.10081
476	GlcNAcb1-6(GlcNAcb1-2)Mana1-6(GlcNAcb1-2Mana1-3)Manb1-4GlcNAcb1-4(Fuca1-6)GlcNAcb-Sp24	68.6012	33.3569	48.6244		414	Gala1-3(Fuca1-2)Galb1-4GlcNAcb1-3GalNAca-Sp14	1153.74	170.272	14.7582
137	Neu5Aca2-6(Galb1-3)GalNAca-Sp14	68.4501	22.679	33.1321		305	Galb1-4GlcNAca1-6Galb1-4GlcNAcb-Sp0	1152.01	26.0074	2.25757
339	GlcNAca1-4Galb1-4GlcNAcb1-3Galb1-4GlcNAcb1-3Galb1-4GlcNAcb-Sp0	67.8796	22.383	32.9746		485	Mana1-6(Mana1-3)Manb1-4GlcNAcb1-4(Fuca1-6)GlcNAcb-Sp19	1147.72	199.367	17.3707
595	GlcNAcb1-3Galb1-4GlcNAcb1-6(Galb1-3)GalNAca-Sp14	67.6872	5.60624	8.28257		77	Fuca1-2Galb1-4GlcNAcb-Sp8	1146.7	85.2267	7.43238
22	6S(3S)Galb1-4(6S)GlcNAcb-Sp0	67.6706	31.184	46.082		402	Galb1-4(Fuca1-3)GlcNAcb1-3GalNAca-Sp14	1138.26	84.6206	7.43422
480	Neu5Aca2-3Galb1-4GlcNAcb1-6GalNAca-Sp14	67.1735	3.8456	5.72489		123	Gala1-4Galb1-4Glcb-Sp0	1133.47	214.538	18.9275
452	GalNAca1-3(Fuca1-2)Galb1-4GlcNAcb1-6(GalNAca1-3(Fuca1-2)Galb1-4GlcNAcb1-3)GalNAc-Sp14	66.9635	10.8076	16.1396		404	Gala1-4Galb1-3GlcNAcb1-2Mana1-6(Gala1-4Galb1-3GlcNAcb1-2Mana1-3)Manb1-4GlcNAcb1-4GlcNAcb-Sp19	1126.06	224.213	19.9112
8	Rhaa-Sp8	66.3772	26.8941	40.5171		422	GlcNAcb1-2(GlcNAcb1-6)Mana1-6(GlcNAcb1-2Mana1-3)Manb1-4GlcNAcb1-4GlcNAcb-Sp19	1125.8	102.842	9.135
599	GlcNAcb1-3Galb1-4GlcNAcb1-3Galb1-4GlcNAcb1-3GalNAca-Sp14	65.8268	10.9298	16.6038		156	Galb1-4(6S)Glcb-Sp0	1122.88	53.3599	4.75205
104	Gala1-3(Fuca1-2)Galb1-4(Fuca1-3)GlcNAcb-Sp0	65.5256	15.4929	23.644		6	Fuca-Sp8	1115.91	143.221	12.8344
257	Neu5Aca2-3Galb1-4(Fuca1-3)GlcNAcb1-3Galb-Sp8	65.1975	33.7304	51.7357		105	Gala1-3(Fuca1-2)Galb1-4(Fuca1-3)GlcNAcb-Sp8	1109.7	204.65	18.4419
153	Galb1-4(Fuca1-3)GlcNAcb-Sp8	64.9763	24.4838	37.6811		243	Neu5Aca2-3Galb1-3(6S)GalNAca-Sp8	1105.5	128.436	11.6179
110	Gala1-4(Gala1-3)Galb1-4GlcNAcb-Sp8	64.9457	10.1932	15.6949		399	Galb1-4GlcNAcb1-2Mana1-6(GlcNAcb1-2Mana1-3)Manb1-4GlcNAcb1-4GlcNAc-Sp12	1102.7	70.7865	6.41937
437	Galb1-4GlcNAcb1-2Mana1-6(GlcNAcb1-4)(Galb1-4GlcNAcb1-4(Galb1-4GlcNAcb1-2)Mana1-3)Manb1-4GlcNAcb1-4GlcNAc-Sp21	64.8463	5.59062	8.62134		335	GalNAcb1-3Gala1-4Galb1-4GlcNAcb1-3Galb1-4Glcb-Sp0	1095.38	114.14	10.4202
123	Gala1-4Galb1-4Glcb-Sp0	64.7953	17.8639	27.5697		567	GlcNAb1-3Galb1-3GalNAc-Sp14	1089.5	112.809	10.3542
550	GlcNAcb1-3Galb1-4GlcNAcb1-3Galb1-4GlcNAcb1-3Galb1-4GlcNAcb1-2Mana1-6(GlcNAcb1-3Galb1-4GlcNAcb1-3Galb1-4GlcNAcb1-3Galb1-4GlcNAcb1-2Mana1-3)Manb1-4GlcNAcb1-4GlcNAcb-Sp25	64.344	6.16541	9.58195		577	GlcNAcb1-3Galb1-4GlcNAcb1-3Galb1-4GlcNAcb1-2Mana1-6(GlcNAcb1-3Galb1-4GlcNAcb1-3Galb1-4GlcNAcb1-2Mana1-3)Manb1-4GlcNAcb1-4(Fuca1-6)GlcNAcb-Sp24	1082.41	86.4236	7.98435
85	(3S)Galb1-4(Fuca1-3)Glcb-Sp0	64.2266	27.8904	43.4249		398	GlcNAcb1-2Mana1-6(Galb1-4GlcNAcb1-2Mana1-3)Manb1-4GlcNAcb1-4GlcNAc-Sp12	1076.83	61.6075	5.72117
148	Galb1-3GlcNAcb1-3Galb1-4GlcNAcb-Sp0	64.0626	20.452	31.925		598	Neu5Aca2-6Galb1-4GlcNAcb1-3Galb1-4GlcNAcb1-3GalNAca-Sp14	1075.09	37.285	3.46807
491	Galb1-3(Fuca1-4)GlcNAcb1-6GalNAca-Sp14	63.8706	15.7811	24.7079		353	GlcNAcb1-2Mana1-6(GlcNAcb1-2Mana1-3)Manb1-4GlcNAcb1-4(Fuca1-6)GlcNAcb-Sp22	1072.95	45.3135	4.22326
242	Neu5Aca2-3Galb1-4(Neu5Aca2-3Galb1-3)GlcNAcb-Sp8	63.8264	12.6666	19.8453		400	Neu5Aca2-3Galb1-3GlcNAcb1-3GalNAca-Sp14	1072.16	115.383	10.7618
305	Galb1-4GlcNAca1-6Galb1-4GlcNAcb-Sp0	63.1601	18.5861	29.427		358	KDNa2-6Galb1-4GlcNAc-Sp0	1067.38	88.0357	8.24786
436	Galb1-4GlcNAcb1-2Mana1-6(GlcNAcb1-4)(Galb1-4GlcNAcb1-2Mana1-3)Manb1-4GlcNAcb1-4GlcNAc-Sp21	63.0497	6.27649	9.95482		436	Galb1-4GlcNAcb1-2Mana1-6(GlcNAcb1-4)(Galb1-4GlcNAcb1-2Mana1-3)Manb1-4GlcNAcb1-4GlcNAc-Sp21	1066.03	41.6374	3.90585
585	Galb1-4GlcNAcb1-3Galb1-4GlcNAcb1-3Galb1-4GlcNAcb1-6(Galb1-4GlcNAcb1-3Galb1-4GlcNAcb1-3Galb1-4GlcNAb1-2)Mana1-6(Galb1-4GlcNAcb1-3Galb1-4GlcNAcb1-3Galb1-4GlcNAcb1-2Mana1-3)Manb1-4GlcNAcb1-4(Fuca1-6)GlcNAcb-Sp24	62.5147	27.4269	43.8727		73	Fuca1-2Galb1-4(Fuca1-3)GlcNAcb-Sp8	1065.46	151.726	14.2405
416	GalNAca1-3GalNAcb1-3Gala1-4Galb1-4Glcb-Sp0	62.3628	5.23053	8.38725		350	Galb1-4GlcNAcb1-2Mana1-3Manb1-4GlcNAcb1-4GlcNAc-Sp12	1063.35	42.2709	3.97528
378	Neu5Aca2-6Galb1-4GlcNAcb1-3GalNAc-Sp14	62.2199	3.24561	5.21635		286	Neu5Gca2-6GalNAca-Sp0	1047.36	94.7921	9.0506
516	(3S)GalNAcb1-4GlcNAc-Sp8	61.5301	8.98726	14.6063		188	GlcNAcb1-6(GlcNAcb1-4)GalNAca-Sp8	1046.71	65.5431	6.2618
186	GlcNAcb1-3Galb1-4Glcb-Sp0	61.3603	13.4425	21.9075		583	Galb1-4GlcNAcb1-3Galb1-4GlcNAcb1-6(Galb1-4GlcNAcb1-3Galb1-4GlcNAb1-2)Mana1-6(Galb1-4GlcNAcb1-3Galb1-4GlcNAcb1-2Mana1-3)Manb1-4GlcNAcb1-4(Fuca1-6)GlcNAcb-Sp24	1043.12	67.3243	6.45412
385	Galb1-4GlcNAcb1-6(Fuca1-4(Fuca1-2Galb1-3)GlcNAcb1-3)Galb1-4Glc-Sp21	61.0169	11.6163	19.0379		152	Galb1-4(Fuca1-3)GlcNAcb-Sp0	1042.97	78.9422	7.56898
472	Neu5Aca2-3Galb1-4GlcNAcb1-6(Neu5Aca2-3Galb1-4GlcNAcb1-3)GalNAca-Sp14	60.4747	21.3911	35.3721		217	Mana1-6(Mana1-3)Mana1-6(Mana1-3)Manb1-4GlcNAcb1-4GlcNAcb-Sp12	1038.64	121.365	11.685
400	Neu5Aca2-3Galb1-3GlcNAcb1-3GalNAca-Sp14	60.4489	27.5791	45.6238		438	Galb1-4GlcNAcb1-6(Galb1-4GlcNAcb1-2)Mana1-6(GlcNAcb1-4)(Galb1-4GlcNAcb1-2Mana1-3)Manb1-4GlcNAcb1-4GlcNAc-Sp21	1037.82	54.9365	5.29346
587	Galb1-4GlcNAcb1-3Galb1-4GlcNAcb1-3Galb1-4GlcNAcb1-3Galb1-4GlcNAcb1-6(Galb1-4GlcNAcb1-3Galb1-4GlcNAcb1-3Galb1-4GlcNAcb1-3Galb1-4GlcNAb1-2)Mana1-6(Galb1-4GlcNAcb1-3Galb1-4GlcNAcb1-3Galb1-4GlcNAcb1-3Galb1-4GlcNAcb1-2Mana1-3)Manb1-4GlcNAcb1-4(Fuca1-6)GlcNAcb-Sp24	59.9789	20.2557	33.7714		100	GalNAcb1-4GlcNAcb-Sp8	1023.54	159.781	15.6106
438	Galb1-4GlcNAcb1-6(Galb1-4GlcNAcb1-2)Mana1-6(GlcNAcb1-4)(Galb1-4GlcNAcb1-2Mana1-3)Manb1-4GlcNAcb1-4GlcNAc-Sp21	59.9061	4.81166	8.03201		120	Gala1-4(Fuca1-2)Galb1-4GlcNAcb-Sp8	1022.52	61.7688	6.04082
576	Galb1-4GlcNAcb1-3Galb1-4GlcNAcb1-2Mana1-6(Galb1-4GlcNAcb1-3Galb1-4GlcNAcb1-2Mana1-3)Manb1-4GlcNAcb1-4(Fuca1-6)GlcNAcb-Sp24	59.7554	21.2646	35.5861		578	Galb1-4GlcNAcb1-3Galb1-4GlcNAcb1-3Galb1-4GlcNAcb1-2Mana1-6(Galb1-4GlcNAcb1-3Galb1-4GlcNAcb1-3Galb1-4GlcNAcb1-2Mana1-3)Manb1-4GlcNAcb1-4(Fuca1-6)GlcNAcb-Sp24	1013.39	68.4191	6.75153
453	Neu5Aca2-8Neu5Aca2-3Galb1-3GalNAcb1-4(Neu5Aca2-8Neu5Aca2-3)Galb1-4Glcb-Sp0	59.7485	12.1127	20.2728		287	Neu5Gca2-6Galb1-4GlcNAcb-Sp0	1013.27	43.449	4.28799
163	Galb1-4GlcNAcb1-3Galb1-4GlcNAcb1-3Galb1-4GlcNAcb-Sp0	59.7066	3.62409	6.06984		84	GalNAca1-3(Fuca1-2)Galb1-4(Fuca1-3)GlcNAcb-Sp0	1007.31	161.886	16.0711
417	Fuca1-2Galb1-4(Fuca1-3)GlcNAcb1-3GalNAca-Sp14	58.9245	3.5666	6.05282		5	GalNAca-Sp15	1001.16	355.017	35.4607
548	Galb1-4GlcNAcb1-3Galb1-4GlcNAcb1-3Galb1-4GlcNAcb1-2Mana1-6(Galb1-4GlcNAcb1-3Galb1-4GlcNAcb1-3Galb1-4GlcNAcb1-2Mana1-3)Manb1-4GlcNAcb1-4GlcNAcb-Sp12	58.8163	7.68897	13.0728		216	Mana1-6(Mana1-3)Mana1-6(Mana1-2Mana1-3)Manb1-4GlcNAcb1-4GlcNAcb-Sp12	998.431	116.824	11.7008
464	Neu5Aca2-6Galb1-4GlcNAcb1-2Mana1-6(GlcNAcb1-4)(Neu5Aca2-6Galb1-4GlcNAcb1-2Mana1-3)Manb1-4GlcNAcb1-4GlcNAcb-Sp21	58.7298	3.16297	5.38563		316	Mana1-2Mana1-6(Mana1-3)Mana1-6(Mana1-2Mana1-2Mana1-3)Mana-Sp9	986.949	102.957	10.4318
287	Neu5Gca2-6Galb1-4GlcNAcb-Sp0	58.6618	3.23046	5.50691		472	Neu5Aca2-3Galb1-4GlcNAcb1-6(Neu5Aca2-3Galb1-4GlcNAcb1-3)GalNAca-Sp14	985.93	178.365	18.091
27	(3S)Galb1-4(6S)Glcb-Sp8	58.6358	22.6225	38.5814		104	Gala1-3(Fuca1-2)Galb1-4(Fuca1-3)GlcNAcb-Sp0	978.564	229.49	23.4517
405	Gala1-4Galb1-4GlcNAcb1-2Mana1-6(Gala1-4Galb1-4GlcNAcb1-2Mana1-3)Manb1-4GlcNAcb1-4GlcNAcb-Sp24	58.4159	18.0453	30.8911		247	Neu5Aca2-3Galb1-3GalNAcb1-3Gala1-4Galb1-4Glcb-Sp0	977.265	46.8245	4.79139
588	GlcNAcb1-3Galb1-4GlcNAcb1-3Galb1-4GlcNAcb1-3Galb1-4GlcNAcb1-3Galb1-4GlcNAcb1-6(GlcNAcb1-3Galb1-4GlcNAcb1-3Galb1-4GlcNAcb1-3Galb1-4GlcNAcb1-3Galb1-4GlcNAb1-2)Mana1-6(GlcNAcb1-3Galb1-4GlcNAcb1-3Galb1-4GlcNAcb1-3Galb1-4GlcNAcb1-3Galb1-4GlcNAcb1-2Mana1-3)Manb1-4GlcNAcb1-4(Fuca1-6)GlcNAcb-Sp24	58.3291	19.9527	34.207		153	Galb1-4(Fuca1-3)GlcNAcb-Sp8	976.939	120.282	12.3122
181	GlcNAcb1-3GalNAca-Sp14	58.2111	16.422	28.2111		160	Galb1-4GlcNAcb1-3GalNAca-Sp8	974.724	433.055	44.4285
21	GlcNAcb1-6(GlcNAcb1-4)(GlcNAcb1-3)GlcNAc-Sp8	57.886	8.19544	14.1579		121	Gala1-4Galb1-4GlcNAcb-Sp0	974.617	26.9619	2.76641
594	GlcNAcb1-3Galb1-4GlcNAcb1-3GalNAca-Sp14	57.8548	3.04566	5.26432		559	GlcNAcb1-3Galb1-4GlcNAcb1-6(GlcNAcb1-3Galb1-4GlcNAcb1-2)Mana1-6(GlcNAcb1-3Galb1-4GlcNAcb1-2Man a1-3)Manb1-4GlcNAcb1-4GlcNAc-Sp24	973.613	38.3018	3.93399
196	Glca1-4Glcb-Sp8	57.2211	18.5515	32.4208		265	Neu5Aca2-3Galb1-4Glcb-Sp8	968.558	63.0281	6.50741
127	Galb1-3(Fuca1-4)GlcNAcb1-3Galb1-4(Fuca1-3)GlcNAcb-Sp0	57.0928	38.9584	68.237		37	(3S)Galb1-4GlcNAcb-Sp8	965.778	56.3432	5.83397
559	GlcNAcb1-3Galb1-4GlcNAcb1-6(GlcNAcb1-3Galb1-4GlcNAcb1-2)Mana1-6(GlcNAcb1-3Galb1-4GlcNAcb1-2Man a1-3)Manb1-4GlcNAcb1-4GlcNAc-Sp24	57.0683	16.335	28.6235		113	Gala1-3GalNAcb-Sp8	947.668	170.137	17.9532
112	Gala1-3GalNAca-Sp16	56.4681	16.4594	29.1481		20	Galb1-4GlcNAcb1-6(Galb1-4GlcNAcb1-3)GalNAc-Sp14	945.312	125.093	13.233
581	GlcNAcb1-3Galb1-4GlcNAcb1-3Galb1-4GlcNAcb1-3Galb1-4GlcNAcb1-3Galb1-4GlcNAcb1-2Mana1-6(GlcNAcb1-3Galb1-4GlcNAcb1-3Galb1-4GlcNAcb1-3Galb1-4GlcNAcb1-3Galb1-4GlcNAcb1-2Mana1-3)Manb1-4GlcNAcb1-4(Fuca1-6)GlcNAcb-Sp19	55.4171	23.9249	43.1724		453	Neu5Aca2-8Neu5Aca2-3Galb1-3GalNAcb1-4(Neu5Aca2-8Neu5Aca2-3)Galb1-4Glcb-Sp0	936.107	135.303	14.4538
152	Galb1-4(Fuca1-3)GlcNAcb-Sp0	55.3104	15.8737	28.6993		322	Neu5Aca2-8Neu5Acb-Sp17	934.857	78.9655	8.4468
246	Neu5Aca2-3Galb-Sp8	55.1577	19.101	34.6299		297	4S(3S)Galb1-4GlcNAcb-Sp0	933.679	114.612	12.2753
466	Neu5Aca2-6Galb1-4GlcNAcb1-6(Neu5Aca2-6Galb1-4GlcNAcb1-2)Mana1-6(GlcNAcb1-4)(Neu5Aca2-6Galb1-4GlcNAcb1-2Mana1-3)Manb1-4GlcNAcb1-4GlcNAcb-Sp21	55.1021	6.82382	12.3839		106	Gala1-3(Fuca1-2)Galb1-4GlcNAc-Sp0	932.812	134.422	14.4104
507	GalNAca1-3(Fuca1-2)Galb1-3GlcNAcb1-6GalNAca-Sp14	55.0148	5.10954	9.28758		337	GalNAca1-3(Fuca1-2)Galb1-4GlcNAcb1-3Galb1-4GlcNAcb1-3Galb1-4GlcNAcb-Sp0	931.242	51.2993	5.50869
337	GalNAca1-3(Fuca1-2)Galb1-4GlcNAcb1-3Galb1-4GlcNAcb1-3Galb1-4GlcNAcb-Sp0	54.9096	5.50748	10.0301		478	Neu5Aca2-6Galb1-4GlcNAcb1-6(Galb1-3GlcNAcb1-3)Galb1-4Glcb-Sp21	927.402	65.6653	7.08057
589	Galb1-4GlcNAcb1-3Galb1-4GlcNAcb1-3Galb1-4GlcNAcb1-3Galb1-4GlcNAcb1-3Galb1-4GlcNAcb1-6(Galb1-4GlcNAcb1-3Galb1-4GlcNAcb1-3Galb1-4GlcNAcb1-3Galb1-4GlcNAcb1-3Galb1-4GlcNAb1-2)Mana1-6(Galb1-4GlcNAcb1-3Galb1-4GlcNAcb1-3Galb1-4GlcNAcb1-3Galb1-4GlcNAcb1-3Galb1-4GlcNAcb1-2Mana1-3)Manb1-4GlcNAcb1-4(Fuca1-6)GlcNAcb-Sp24	54.8987	6.7996	12.3857		602	Neu5Aca2-6Galb1-4GlcNAcb1-3Galb1-4GlcNAcb1-6(Galb1-3)GalNAca-Sp14	926.668	85.0545	9.17853
183	GlcNAcb1-3Galb1-4GlcNAcb-Sp0	54.7551	18.2661	33.3596		433	GlcNAcb1-2Mana1-6(GlcNAcb1-4)(GlcNAcb1-4(GlcNAcb1-2)Mana1-3)Manb1-4GlcNAcb1-4GlcNAc-Sp21	925.037	80.3207	8.68298
275	Neu5Aca2-6Galb-Sp8	54.7055	20.5608	37.5846		246	Neu5Aca2-3Galb-Sp8	924.047	62.0469	6.71469
562	GlcNAcb1-3Galb1-4GlcNAcb1-6(GlcNAcb1-3Galb1-3)GalNAca-Sp14	54.5571	30.4376	55.7904		448	Galb1-4(Fuca1-3)GlcNAcb1-6GalNAc-Sp14	923.115	92.3935	10.0089
54	Galb1-4GlcNAcb1-2Mana1-6(Galb1-4GlcNAcb1-2Mana1-3)Manb1-4GlcNAcb1-4GlcNAcb-Sp12	54.4428	13.4059	24.6239		417	Fuca1-2Galb1-4(Fuca1-3)GlcNAcb1-3GalNAca-Sp14	922.781	97.4018	10.5552
352	Mana1-6(Galb1-4GlcNAcb1-2Mana1-3)Manb1-4GlcNAcb1-4GlcNAcb-Sp12	54.2269	11.5232	21.25		98	GalNAcb1-4(Fuca1-3)GlcNAcb-Sp0	919.311	125.966	13.7022
55	Neu5Aca2-6Galb1-4GlcNAcb1-2Mana1-6(Neu5Aca2-6Galb1-4GlcNAcb1-2Mana1-3)Manb1-4GlcNAcb1-4GlcNAcb-Sp12	54.0856	11.5507	21.3564		171	Galb1-4GlcNAcb-Sp23	910.845	167.896	18.433
409	GalNAcb1-3Gala1-6Galb1-4Glcb-Sp8	54.0564	12.7381	23.5645		85	(3S)Galb1-4(Fuca1-3)Glcb-Sp0	901.495	159.472	17.6897
48	Neu5,9Ac2a-Sp8	54.0425	10.823	20.0268		600	Galb1-4GlcNAcb1-3Galb1-3GalNAca-Sp14	901.085	95.8616	10.6385
578	Galb1-4GlcNAcb1-3Galb1-4GlcNAcb1-3Galb1-4GlcNAcb1-2Mana1-6(Galb1-4GlcNAcb1-3Galb1-4GlcNAcb1-3Galb1-4GlcNAcb1-2Mana1-3)Manb1-4GlcNAcb1-4(Fuca1-6)GlcNAcb-Sp24	53.837	12.0558	22.3931		232	GalNAcb1-4(Neu5Aca2-3)Galb1-4GlcNAcb-Sp0	900.242	108.672	12.0714
316	Mana1-2Mana1-6(Mana1-3)Mana1-6(Mana1-2Mana1-2Mana1-3)Mana-Sp9	53.7268	15.6931	29.209		112	Gala1-3GalNAca-Sp16	900.095	190.93	21.2122
422	GlcNAcb1-2(GlcNAcb1-6)Mana1-6(GlcNAcb1-2Mana1-3)Manb1-4GlcNAcb1-4GlcNAcb-Sp19	53.6773	11.8871	22.1454		442	Neu5Aca2-3Galb1-4GlcNAcb1-3Galb-Sp8	898.969	50.8255	5.65376
97	GalNAcb1-3Gala1-4Galb1-4GlcNAcb-Sp0	53.6459	13.7239	25.5823		386	Galb1-4(Fuca1-3)GlcNAcb1-6(Fuca1-4(Fuca1-2Galb1-3)GlcNAcb1-3)Galb1-4Glc-Sp21	898.385	179.603	19.9918
461	Neu5Aca2-3Galb1-4GlcNAcb1-4Mana1-6(GlcNAcb1-4)(Neu5Aca2-3Galb1-4GlcNAcb1-4(Neu5Aca2-3Galb1-4GlcNAcb1-2)Mana1-3)Manb1-4GlcNAcb1-4GlcNAcb-Sp21	53.5098	18.3101	34.2183		204	GlcAb1-3Galb-Sp8	897.872	132.898	14.8015
343	GlcNAca1-4Galb1-4GlcNAcb1-3Galb1-4(Fuca1-3)GlcNAcb1-3Galb1-4(Fuca1-3)GlcNAcb-Sp0	53.0826	15.7749	29.7177		293	Galb1-4(Fuca1-3)GlcNAcb1-3Galb1-3(Fuca1-4)GlcNAcb-Sp0	895.891	64.0828	7.15297
420	Galb1-4(Fuca1-3)GlcNAcb1-2Mana1-6(Galb1-4(Fuca1-3)GlcNAcb1-2Mana1-3)Manb1-4GlcNAcb1-4(Fuca1-6)GlcNAcb-Sp22	53.0395	15.2168	28.6895		467	Neu5Aca2-6Galb1-4GlcNAcb1-6(Neu5Aca2-6Galb1-4GlcNAcb1-2)Mana1-6(GlcNAcb1-4)(Neu5Aca2-6Galb1-4GlcNAcb1-4(Neu5Aca2-6Galb1-4GlcNAcb1-2)Mana1-3)Manb1-4GlcNAcb1-4GlcNAcb-Sp21	888.553	38.6331	4.34787
347	Mana1-6(Neu5Aca2-6Galb1-4GlcNAcb1-2Mana1-3)Manb1-4GlcNAcb1-4GlcNAc-Sp12	52.9943	23.742	44.8011		513	(6S)GalNAcb1-4GlcNAc-Sp8	885.219	22.2725	2.51605
99	GalNAcb1-4GlcNAcb-Sp0	52.9636	22.2331	41.9781		393	GalNAcb1-4(Neu5Aca2-3)Galb1-4GlcNAcb1-3GalNAca-Sp14	882.859	56.988	6.45494
413	Neu5Aca2-3Galb1-3GalNAcb1-4(Neu5Aca2-8Neu5Aca2-3)Galb1-4Glcb-Sp0	52.8693	9.48958	17.9491		63	Fuca1-2Galb1-3GalNAca-Sp14	879.118	58.498	6.65417
384	Galb1-4(Fuca1-3)GlcNAcb1-6(Galb1-3GlcNAcb1-3)Galb1-4Glc-Sp21	52.858	10.7024	20.2475		384	Galb1-4(Fuca1-3)GlcNAcb1-6(Galb1-3GlcNAcb1-3)Galb1-4Glc-Sp21	875.508	153.89	17.5773
240	Neu5Aca2-3Galb1-3(Fuca1-4)GlcNAcb-Sp8	52.6755	12.3748	23.4925		36	(3S)Galb1-4GlcNAcb-Sp0	874.482	65.6583	7.50825
555	Neu5Gca2-8Neu5Aca2-3Galb1-4GlcNAc-Sp0	52.4116	23.6905	45.2008		464	Neu5Aca2-6Galb1-4GlcNAcb1-2Mana1-6(GlcNAcb1-4)(Neu5Aca2-6Galb1-4GlcNAcb1-2Mana1-3)Manb1-4GlcNAcb1-4GlcNAcb-Sp21	870.227	91.1016	10.4687
247	Neu5Aca2-3Galb1-3GalNAcb1-3Gala1-4Galb1-4Glcb-Sp0	52.219	8.8323	16.914		589	Galb1-4GlcNAcb1-3Galb1-4GlcNAcb1-3Galb1-4GlcNAcb1-3Galb1-4GlcNAcb1-3Galb1-4GlcNAcb1-6(Galb1-4GlcNAcb1-3Galb1-4GlcNAcb1-3Galb1-4GlcNAcb1-3Galb1-4GlcNAcb1-3Galb1-4GlcNAb1-2)Mana1-6(Galb1-4GlcNAcb1-3Galb1-4GlcNAcb1-3Galb1-4GlcNAcb1-3Galb1-4GlcNAcb1-3Galb1-4GlcNAcb1-2Mana1-3)Manb1-4GlcNAcb1-4(Fuca1-6)GlcNAcb-Sp24	869.529	50.1181	5.76382
293	Galb1-4(Fuca1-3)GlcNAcb1-3Galb1-3(Fuca1-4)GlcNAcb-Sp0	52.0725	13.4031	25.7392		183	GlcNAcb1-3Galb1-4GlcNAcb-Sp0	860.151	242.695	28.2154
88	GalNAca1-3(Fuca1-2)Galb1-4Glcb-Sp0	51.7518	24.9549	48.2203		109	Gala1-3(Fuca1-2)Galb-Sp18	858.714	259.762	30.2501
372	Gala1-3(Fuca1-2)Galb1-4GlcNAcb1-2Mana1-6(Gala1-3(Fuca1-2)Galb1-4GlcNAcb1-2Mana1-3)Manb1-4GlcNAcb1-4GlcNAcb-Sp20	51.6956	28.0037	54.1704		545	Fuca1-2Galb1-4GlcNAcb1-3Galb1-4GlcNAcb1-2Mana1-6(Fuca1-2Galb1-4GlcNAcb1-3Galb1-4GlcNAcb1-2Mana1-3)Manb1-4GlcNAcb1-4GlcNAcb-Sp24	855.324	32.3109	3.77762
223	Fuca1-2(6S)Galb1-4(6S)Glcb-Sp0	51.5534	16.849	32.6826		71	Fuca1-2Galb1-4(Fuca1-3)GlcNAcb1-3Galb1-4(Fuca1-3)GlcNAcb1-3Galb1-4(Fuca1-3)GlcNAcb-Sp0	852.848	59.0515	6.92404
377	Neu5Aca2-3Galb1-4GlcNAcb1-3GalNAc-Sp14	51.2701	14.0516	27.407		538	Gala1-3(Fuca1-2)Galb1-3GalNAcb1-3Gala1-4Galb1-4Glc-Sp21	851.654	46.8963	5.5065
241	Neu5Aca2-3Galb1-3(Fuca1-4)GlcNAcb1-3Galb1-4(Fuca1-3)GlcNAcb-Sp0	51.1381	7.70225	15.0617		352	Mana1-6(Galb1-4GlcNAcb1-2Mana1-3)Manb1-4GlcNAcb1-4GlcNAcb-Sp12	841.169	45.8082	5.44578
166	Galb1-4GlcNAcb1-3Galb1-4Glcb-Sp8	51.1089	13.814	27.0286		266	Neu5Aca2-6GalNAca-Sp8	837.681	118.819	14.1843
556	Neu5Gca2-8Neu5Gca2-3Galb1-4GlcNAcb1-3Galb1-4GlcNAc-Sp0	51.0538	20.3874	39.933		87	GalNAca1-3(Fuca1-2)Galb1-4GlcNAcb-Sp8	837.16	121.151	14.4717
342	GlcNAca1-4Galb1-4GlcNAcb1-3Galb1-4Glcb-Sp0	50.9271	14.7593	28.9813		514	(3S)GalNAcb1-4(3S)GlcNAc-Sp8	831.993	35.7274	4.2942
72	Fuca1-2Galb1-4(Fuca1-3)GlcNAcb-Sp0	50.6521	2.48055	4.89723		554	Neu5Aca2-8Neu5Gca2-3Galb1-4GlcNAc-Sp0	826.242	54.0968	6.54733
459	Galb1-4GlcNAcb1-6(Galb1-4GlcNAcb1-2)Mana1-6(Galb1-4GlcNAcb1-2Mana1-3)Manb1-4GlcNAcb1-4GlcNAcb-Sp19	50.5484	6.4791	12.8176		162	Galb1-4GlcNAcb1-3Galb1-4(Fuca1-3)GlcNAcb1-3Galb1-4(Fuca1-3)GlcNAcb-Sp0	822.865	140.808	17.1119
86	GalNAca1-3(Fuca1-2)Galb1-4GlcNAcb-Sp0	50.5211	14.9989	29.6884		159	Galb1-4GalNAcb1-3(Fuca1-2)Galb1-4GlcNAcb-Sp8	815.236	87.8373	10.7745
306	Galb1-4GlcNAcb1-6Galb1-4GlcNAcb-Sp0	50.4928	15.9066	31.5026		557	Neu5Gca2-8Neu5Gca2-6Galb1-4GlcNAc-Sp0	814.666	38.6747	4.74731
304	GlcNAcb1-6(Galb1-4GlcNAcb1-3)Galb1-4GlcNAc-Sp0	50.4285	16.9287	33.5697		576	Galb1-4GlcNAcb1-3Galb1-4GlcNAcb1-2Mana1-6(Galb1-4GlcNAcb1-3Galb1-4GlcNAcb1-2Mana1-3)Manb1-4GlcNAcb1-4(Fuca1-6)GlcNAcb-Sp24	811.704	51.9923	6.40533
460	Neu5Aca2-3Galb1-4GlcNAcb1-2Mana1-6(GlcNAcb1-4)(Neu5Aca2-3Galb1-4GlcNAcb1-2Mana1-3)Manb1-4GlcNAcb1-4GlcNAcb-Sp21	50.2937	12.7962	25.443		96	GalNAcb1-3(Fuca1-2)Galb-Sp8	810.359	63.4477	7.82959
468	Gala1-3(Fuca1-2)Galb1-3GalNAca-Sp8	50.1036	7.0893	14.1493		186	GlcNAcb1-3Galb1-4Glcb-Sp0	809.218	57.7507	7.13661
24	(3S)Galb1-4(Fuca1-3)(6S)Glc-Sp0	50.0085	16.0902	32.1749		235	Neu5Aca2-3Galb1-3GalNAcb1-4(Neu5Aca2-3)Galb1-4Glcb-Sp0	807.021	155.369	19.2522
61	Fuca1-2Galb1-3(Fuca1-4)GlcNAcb-Sp8	49.9737	14.0232	28.0611		50	Mana1-6(Mana1-3)Manb1-4GlcNAcb1-4GlcNAcb-Sp12	800.704	61.4709	7.6771
60	Fuca1-2Galb1-3GalNAcb1-3Gala1-4Galb1-4Glcb-Sp9	49.8893	10.0249	20.0944		390	Fuca1-2Galb1-3GalNAca1-3(Fuca1-2)Galb1-4Glcb-Sp0	797.083	105.83	13.2771
423	Fuca1-2Galb1-3GlcNAcb1-3GalNAc-Sp14	49.5503	7.69254	15.5247		284	Neu5Gca2-3Galb1-4GlcNAcb-Sp0	796.093	25.1243	3.15596
411	Galb1-4GlcNAcb1-6(Neu5Aca2-6Galb1-3GlcNAcb1-3)Galb1-4Glc-Sp21	49.2776	29.4643	59.7924		223	Fuca1-2(6S)Galb1-4(6S)Glcb-Sp0	789.382	92.6034	11.7311
258	Neu5Aca2-3Galb1-4(Fuca1-3)GlcNAcb1-3Galb1-4GlcNAcb-Sp8	48.8011	8.16368	16.7285		582	Galb1-4GlcNAcb1-3Galb1-4GlcNAcb1-3Galb1-4GlcNAcb1-3Galb1-4GlcNAcb1-3Galb1-4GlcNAcb1-2Mana1-6(Galb1-4GlcNAcb1-3Galb1-4GlcNAcb1-3Galb1-4GlcNAcb1-3Galb1-4GlcNAcb1-3Galb1-4GlcNAcb1-2Mana1-3)Manb1-4GlcNAcb1-4(Fuca1-6)GlcNAcb-Sp19	786.971	74.0795	9.41324
227	GalNAcb1-4(Neu5Aca2-8Neu5Aca2-8Neu5Aca2-3)Galb1-4Glcb-Sp0	48.675	15.5811	32.0104		338	Neu5Aca2-3Galb1-4(Fuca1-3)GlcNAcb1-6(Neu5Aca2-3Galb1-3)GalNAc-Sp14	785.242	73.5095	9.36137
533	Galb1-4GlcNAcb1-2 Mana1-6(Galb1-4GlcNAcb1-4)(Galb1-4GlcNAcb1-2Mana1-3)Manb1-4GlcNAcb1-4(Fuca1-6)GlcNAc-Sp21	48.6332	20.1955	41.5262		306	Galb1-4GlcNAcb1-6Galb1-4GlcNAcb-Sp0	785.238	388.49	49.4742
62	Fuca1-2Galb1-3GalNAca-Sp8	48.6275	20.3881	41.9271		185	GlcNAcb1-3Galb1-4GlcNAcb1-3Galb1-4GlcNAcb-Sp0	776.486	53.1044	6.83908
365	Galb1-4GlcNAcb1-2Mana1-6(Mana1-3)Manb1-4GlcNAcb1-4GlcNAcb-Sp12	48.6129	9.99204	20.5543		535	Neu5Aca2-3Galb1-4(Fuca1-3)GlcNAcb1-2Mana-Sp0	768.529	54.6028	7.10485
317	Mana1-2Mana1-6(Mana1-2Mana1-3)Mana1-6(Mana1-2Mana1-2Mana1-3)Mana-Sp9	48.5572	7.32841	15.0923		465	Neu5Aca2-6Galb1-4GlcNAcb1-4Mana1-6(GlcNAcb1-4)(Neu5Aca2-6Galb1-4GlcNAcb1-4(Neu5Aca2-6Galb1-4GlcNAcb1-2)Mana1-3)Manb1-4GlcNAcb1-4GlcNAcb-Sp21	766.375	10.0634	1.31311
358	KDNa2-6Galb1-4GlcNAc-Sp0	48.3017	6.90958	14.305		435	GlcNAcb1-6(GlcNAcb1-2)Mana1-6(GlcNAcb1-4)(GlcNAcb1-4(GlcNAcb1-2)Mana1-3)Manb1-4GlcNAcb1-4GlcNAc-Sp21	761.587	19.6847	2.58469
311	GlcNAcb1-4GlcNAcb-Sp10	48.1552	9.85449	20.464		177	GlcNAcb1-6(GlcNAcb1-3)GalNAca-Sp8	760.817	159.729	20.9945
598	Neu5Aca2-6Galb1-4GlcNAcb1-3Galb1-4GlcNAcb1-3GalNAca-Sp14	47.8097	4.80346	10.047		581	GlcNAcb1-3Galb1-4GlcNAcb1-3Galb1-4GlcNAcb1-3Galb1-4GlcNAcb1-3Galb1-4GlcNAcb1-2Mana1-6(GlcNAcb1-3Galb1-4GlcNAcb1-3Galb1-4GlcNAcb1-3Galb1-4GlcNAcb1-3Galb1-4GlcNAcb1-2Mana1-3)Manb1-4GlcNAcb1-4(Fuca1-6)GlcNAcb-Sp19	759.771	278.283	36.6272
66	Fuca1-2Galb1-3GlcNAcb1-3Galb1-4Glcb-Sp8	47.3717	3.06207	6.46392		460	Neu5Aca2-3Galb1-4GlcNAcb1-2Mana1-6(GlcNAcb1-4)(Neu5Aca2-3Galb1-4GlcNAcb1-2Mana1-3)Manb1-4GlcNAcb1-4GlcNAcb-Sp21	759.163	73.1139	9.63086
531	GlcNAcb1-2 Mana1-6(GlcNAcb1-4)(GlcNAcb1-2Mana1-3)Manb1-4GlcNAcb1-4(Fuca1-6)GlcNAc-Sp21	47.228	18.073	38.2674		276	Neu5Aca2-8Neu5Aca-Sp8	756.773	118.073	15.6022
91	GalNAca1-3(Fuca1-2)Galb-Sp18	47.1977	28.8016	61.0232		339	GlcNAca1-4Galb1-4GlcNAcb1-3Galb1-4GlcNAcb1-3Galb1-4GlcNAcb-Sp0	754.93	86.9601	11.519
84	GalNAca1-3(Fuca1-2)Galb1-4(Fuca1-3)GlcNAcb-Sp0	47.1606	13.2068	28.0038		274	Neu5Aca2-6Galb1-4Glcb-Sp8	748.107	40.2532	5.38068
505	(3S)GalNAcb1-4(Fuca1-3)GlcNAcb-Sp8	46.4304	15.2934	32.9383		29	(3S)Galb1-3GalNAca-Sp8	745.573	161.972	21.7245
73	Fuca1-2Galb1-4(Fuca1-3)GlcNAcb-Sp8	46.3358	17.8157	38.449		389	GlcNAcb1-2Mana1-6(GlcNAcb1-4(GlcNAcb1-2)Mana1-3)Manb1-4GlcNAcb1-4GlcNAc-Sp21	738.678	23.9968	3.24861
586	GlcNAcb1-3Galb1-4GlcNAcb1-3Galb1-4GlcNAcb1-3Galb1-4GlcNAcb1-6(GlcNAcb1-3Galb1-4GlcNAcb1-3Galb1-4GlcNAcb1-3Galb1-4GlcNAb1-2)Mana1-6(GlcNAcb1-3Galb1-4GlcNAcb1-3Galb1-4GlcNAcb1-3Galb1-4GlcNAcb1-2Mana1-3)Manb1-4GlcNAcb1-4(Fuca1-6)GlcNAcb-Sp24	46.2749	11.0769	23.9372		394	GalNAca1-3(Fuca1-2)Galb1-3GalNAca1-3(Fuca1-2)Galb1-4GlcNAcb-Sp0	736.391	37.9879	5.15866
349	Neu5Aca2-6Galb1-4GlcNAcb1-2Mana1-3Manb1-4GlcNAcb1-4GlcNAc-Sp12	46.2355	7.00774	15.1566		550	GlcNAcb1-3Galb1-4GlcNAcb1-3Galb1-4GlcNAcb1-3Galb1-4GlcNAcb1-2Mana1-6(GlcNAcb1-3Galb1-4GlcNAcb1-3Galb1-4GlcNAcb1-3Galb1-4GlcNAcb1-2Mana1-3)Manb1-4GlcNAcb1-4GlcNAcb-Sp25	735.626	84.2673	11.4552
398	GlcNAcb1-2Mana1-6(Galb1-4GlcNAcb1-2Mana1-3)Manb1-4GlcNAcb1-4GlcNAc-Sp12	46.2328	14.0514	30.3926		587	Galb1-4GlcNAcb1-3Galb1-4GlcNAcb1-3Galb1-4GlcNAcb1-3Galb1-4GlcNAcb1-6(Galb1-4GlcNAcb1-3Galb1-4GlcNAcb1-3Galb1-4GlcNAcb1-3Galb1-4GlcNAb1-2)Mana1-6(Galb1-4GlcNAcb1-3Galb1-4GlcNAcb1-3Galb1-4GlcNAcb1-3Galb1-4GlcNAcb1-2Mana1-3)Manb1-4GlcNAcb1-4(Fuca1-6)GlcNAcb-Sp24	735.131	131.17	17.8431
5	GalNAca-Sp15	46.1046	17.8598	38.7377		599	GlcNAcb1-3Galb1-4GlcNAcb1-3Galb1-4GlcNAcb1-3GalNAca-Sp14	734.388	68.5208	9.33032
545	Fuca1-2Galb1-4GlcNAcb1-3Galb1-4GlcNAcb1-2Mana1-6(Fuca1-2Galb1-4GlcNAcb1-3Galb1-4GlcNAcb1-2Mana1-3)Manb1-4GlcNAcb1-4GlcNAcb-Sp24	45.9265	3.03657	6.6118		268	Neu5Aca2-6Galb1-4(6S)GlcNAcb-Sp8	733.45	81.3996	11.0982
215	Mana1-2Mana1-2Mana1-6(Mana1-3)Mana-Sp9	45.8261	25.5174	55.6831		132	Galb1-4GlcNAcb1-6GalNAca-Sp8	732.297	83.6048	11.4168
603	Neu5Aca2-6Galb1-4GlcNAcb1-6(Galb1-3)GalNAca-Sp14	45.8162	14.0664	30.7017		220	(3S)Galb1-4(Fuca1-3)(6S)GlcNAcb-Sp8	732.016	81.3168	11.1086
260	Neu5Aca2-3Galb1-4GlcNAcb-Sp0	45.7475	16.8584	36.8509		351	Galb1-4GlcNAcb1-2Mana1-6Manb1-4GlcNAcb1-4GlcNAc-Sp12	728.596	52.2086	7.16564
574	Neu5Aca2-8Neu5Aca2-3Galb1-3GalNAcb1-4(Neu5Aca2-3)Galb1-4Glc-Sp21	45.6878	14.6537	32.0736		158	Galb1-4GalNAca1-3(Fuca1-2)Galb1-4GlcNAcb-Sp8	726.43	103.989	14.3151
132	Galb1-4GlcNAcb1-6GalNAca-Sp8	45.5382	28.6608	62.9378		556	Neu5Gca2-8Neu5Gca2-3Galb1-4GlcNAcb1-3Galb1-4GlcNAc-Sp0	724.488	75.5777	10.4319
584	GlcNAcb1-3Galb1-4GlcNAcb1-3Galb1-4GlcNAcb1-6(GlcNAcb1-3Galb1-4GlcNAcb1-3Galb1-4GlcNAb1-2)Mana1-6(GlcNAcb1-3Galb1-4GlcNAcb1-3Galb1-4GlcNAcb1-2Mana1-3)Manb1-4GlcNAcb1-4(Fuca1-6)GlcNAcb-Sp24	45.5279	10.8925	23.9249		555	Neu5Gca2-8Neu5Aca2-3Galb1-4GlcNAc-Sp0	722.848	108.71	15.0391
6	Fuca-Sp8	45.4078	24.4016	53.7389		64	Fuca1-2Galb1-3GalNAcb1-4(Neu5Aca2-3)Galb1-4Glcb-Sp0	720.353	72.3842	10.0484
209	Mana1-2Mana1-6(Mana1-2Mana1-3)Mana-Sp9	45.3763	13.1077	28.8868		585	Galb1-4GlcNAcb1-3Galb1-4GlcNAcb1-3Galb1-4GlcNAcb1-6(Galb1-4GlcNAcb1-3Galb1-4GlcNAcb1-3Galb1-4GlcNAb1-2)Mana1-6(Galb1-4GlcNAcb1-3Galb1-4GlcNAcb1-3Galb1-4GlcNAcb1-2Mana1-3)Manb1-4GlcNAcb1-4(Fuca1-6)GlcNAcb-Sp24	717.778	48.8968	6.81225
36	(3S)Galb1-4GlcNAcb-Sp0	45.3014	3.14755	6.94802		432	GlcNAcb1-2Mana1-6(GlcNAcb1-4)(GlcNAcb1-2Mana1-3)Manb1-4GlcNAcb1-4GlcNAc-Sp21	717.213	51.5498	7.18751
278	Galb1-3(Fuca1-4)GlcNAcb1-3Galb1-3(Fuca1-4)GlcNAcb-Sp0	45.1324	10.0514	22.271		309	Neu5Aca2-6Galb1-4GlcNAcb1-2Mana1-6(GlcNAcb1-2Mana1-3)Manb1-4GlcNAcb1-4GlcNAcb-Sp12	715.72	87.3502	12.2045
243	Neu5Aca2-3Galb1-3(6S)GalNAca-Sp8	45.0253	6.16274	13.6873		372	Gala1-3(Fuca1-2)Galb1-4GlcNAcb1-2Mana1-6(Gala1-3(Fuca1-2)Galb1-4GlcNAcb1-2Mana1-3)Manb1-4GlcNAcb1-4GlcNAcb-Sp20	713.038	45.6138	6.39711
50	Mana1-6(Mana1-3)Manb1-4GlcNAcb1-4GlcNAcb-Sp12	44.9852	11.8553	26.3538		249	Fuca1-2(6S)Galb1-4Glcb-Sp0	712.189	149.454	20.9852
553	Neu5Gca2-8Neu5Gca2-3Galb1-4GlcNAc-Sp0	44.9057	24.27	54.0465		318	Neu5Aca2-3Galb1-4GlcNAcb1-6(Neu5Aca2-3Galb1-3)GalNAca-Sp14	709.186	62.086	8.75454
577	GlcNAcb1-3Galb1-4GlcNAcb1-3Galb1-4GlcNAcb1-2Mana1-6(GlcNAcb1-3Galb1-4GlcNAcb1-3Galb1-4GlcNAcb1-2Mana1-3)Manb1-4GlcNAcb1-4(Fuca1-6)GlcNAcb-Sp24	44.6923	11.3217	25.3325		420	Galb1-4(Fuca1-3)GlcNAcb1-2Mana1-6(Galb1-4(Fuca1-3)GlcNAcb1-2Mana1-3)Manb1-4GlcNAcb1-4(Fuca1-6)GlcNAcb-Sp22	707.534	59.4275	8.39924
434	GlcNAcb1-6(GlcNAcb1-2)Mana1-6(GlcNAcb1-4)(GlcNAcb1-2Mana1-3)Manb1-4GlcNAcb1-4GlcNAc-Sp21	44.6051	13.1922	29.5755		55	Neu5Aca2-6Galb1-4GlcNAcb1-2Mana1-6(Neu5Aca2-6Galb1-4GlcNAcb1-2Mana1-3)Manb1-4GlcNAcb1-4GlcNAcb-Sp12	706.695	71.7747	10.1564
512	(6S)(4S)GalNAcb1-4GlcNAc-Sp8	44.5209	13.7167	30.8095		283	Neu5Gca2-3Galb1-4(Fuca1-3)GlcNAcb-Sp0	701.672	81.8224	11.6611
537	GalNAca1-3(Fuca1-2)Galb1-3GalNAcb1-3Gala1-4Galb1-4Glc-Sp21	44.4935	14.719	33.0811		214	Mana1-6(Mana1-3)Mana-Sp9	700.217	158.641	22.656
224	Neu5Aca2-3Galb1-3GalNAca-Sp8	44.2369	5.41337	12.2372		99	GalNAcb1-4GlcNAcb-Sp0	699.669	194.681	27.8248
557	Neu5Gca2-8Neu5Gca2-6Galb1-4GlcNAc-Sp0	44.2352	6.13699	13.8736		524	GalNAca1-3(Fuca1-2)Galb1-4 GlcNAcb1-2Mana-Sp0	696.18	112.209	16.1179
393	GalNAcb1-4(Neu5Aca2-3)Galb1-4GlcNAcb1-3GalNAca-Sp14	44.0761	13.5931	30.84		416	GalNAca1-3GalNAcb1-3Gala1-4Galb1-4Glcb-Sp0	693.815	35.5973	5.13066
284	Neu5Gca2-3Galb1-4GlcNAcb-Sp0	43.8879	6.01996	13.7167		324	Neu5Gcb2-6Galb1-4GlcNAc-Sp8	691.426	98.5033	14.2464
478	Neu5Aca2-6Galb1-4GlcNAcb1-6(Galb1-3GlcNAcb1-3)Galb1-4Glcb-Sp21	43.5828	15.9895	36.6878		292	Galb1-4(Fuca1-3)(6S)Glcb-Sp0	689.904	57.1552	8.28451
484	Neu5Aca2-3Galb1-4GlcNAcb1-2Mana1-6(Neu5Aca2-3Galb1-4GlcNAcb1-2Mana1-3)Manb1-4GlcNAcb1-4(Fuca1-6)GlcNAcb-Sp24	43.5538	13.7815	31.6426		127	Galb1-3(Fuca1-4)GlcNAcb1-3Galb1-4(Fuca1-3)GlcNAcb-Sp0	689.678	128.459	18.626
300	Neu5Aca2-3Galb1-4(Fuca1-3)GlcNAcb1-6(Galb1-3)GalNAca-Sp14	43.3341	14.7525	34.0435		484	Neu5Aca2-3Galb1-4GlcNAcb1-2Mana1-6(Neu5Aca2-3Galb1-4GlcNAcb1-2Mana1-3)Manb1-4GlcNAcb1-4(Fuca1-6)GlcNAcb-Sp24	683.514	20.4714	2.99502
600	Galb1-4GlcNAcb1-3Galb1-3GalNAca-Sp14	43.2223	4.6438	10.744		165	Galb1-4GlcNAcb1-3Galb1-4Glcb-Sp0	677.55	72.7334	10.7348
338	Neu5Aca2-3Galb1-4(Fuca1-3)GlcNAcb1-6(Neu5Aca2-3Galb1-3)GalNAc-Sp14	43.0385	18.5934	43.2018		370	Galb1-4GlcNAcb1-2Mana1-6(Galb1-4GlcNAcb1-4(Galb1-4GlcNAcb1-2)Mana1-3)Manb1-4GlcNAcb1-4GlcNAc-Sp21	673.854	60.1348	8.92402
373	Gala1-3Galb1-4(Fuca1-3)GlcNAcb1-2Mana1-6(Gala1-3Galb1-4(Fuca1-3)GlcNAcb1-2Mana1-3)Manb1-4GlcNAcb1-4GlcNAcb-Sp20	42.8907	8.74558	20.3904		233	GalNAcb1-4(Neu5Aca2-3)Galb1-4GlcNAcb-Sp8	671.054	53.5212	7.9757
333	Neu5Aca2-6Galb1-4GlcNAcb1-3Galb1-4GlcNAcb1-3Galb1-4GlcNAcb-Sp0	42.4198	15.569	36.7023		320	Galb1-4GlcNAcb1-2Mana1-6(Neu5Aca2-6Galb1-4GlcNAcb1-2Mana1-3)Manb1-4GlcNAcb1-4GlcNAcb-Sp12	668.178	53.3642	7.98653
162	Galb1-4GlcNAcb1-3Galb1-4(Fuca1-3)GlcNAcb1-3Galb1-4(Fuca1-3)GlcNAcb-Sp0	42.194	8.688	20.5906		303	Galb1-4GlcNAcb1-6(Galb1-4GlcNAcb1-3)Galb1-4GlcNAc-Sp0	665.35	78.889	11.8568
10	Neu5Aca-Sp11	42.1146	19.5337	46.3821		278	Galb1-3(Fuca1-4)GlcNAcb1-3Galb1-3(Fuca1-4)GlcNAcb-Sp0	664.455	41.5161	6.24814
418	Gala1-3(Fuca1-2)Galb1-4(Fuca1-3)GlcNAcb1-3GalNAc-Sp14	42.0342	5.75313	13.6868		76	Fuca1-2Galb1-4GlcNAcb-Sp0	662.239	67.1639	10.1419
431	Fuca1-3GlcNAcb1-6(Galb1-4GlcNAcb1-3)Galb1-4Glc-Sp21	41.9727	22.992	54.7784		97	GalNAcb1-3Gala1-4Galb1-4GlcNAcb-Sp0	658.67	156.469	23.7553
248	Neu5Aca2-3Galb1-3GlcNAcb1-3Galb1-4GlcNAcb-Sp0	41.7202	10.5089	25.189		461	Neu5Aca2-3Galb1-4GlcNAcb1-4Mana1-6(GlcNAcb1-4)(Neu5Aca2-3Galb1-4GlcNAcb1-4(Neu5Aca2-3Galb1-4GlcNAcb1-2)Mana1-3)Manb1-4GlcNAcb1-4GlcNAcb-Sp21	657.186	4.35459	0.662612
233	GalNAcb1-4(Neu5Aca2-3)Galb1-4GlcNAcb-Sp8	41.6877	7.38298	17.7102		537	GalNAca1-3(Fuca1-2)Galb1-3GalNAcb1-3Gala1-4Galb1-4Glc-Sp21	652.545	132.985	20.3794
488	Neu5Aca2-6Galb1-4GlcNAcb1-6(Fuca1-2Galb1-4(Fuca1-3)GlcNAcb1-3)Galb1-4Glc-Sp21	41.6737	14.0881	33.8057		584	GlcNAcb1-3Galb1-4GlcNAcb1-3Galb1-4GlcNAcb1-6(GlcNAcb1-3Galb1-4GlcNAcb1-3Galb1-4GlcNAb1-2)Mana1-6(GlcNAcb1-3Galb1-4GlcNAcb1-3Galb1-4GlcNAcb1-2Mana1-3)Manb1-4GlcNAcb1-4(Fuca1-6)GlcNAcb-Sp24	652.02	31.9051	4.89327
259	Neu5Aca2-3Galb1-4GlcNAcb1-3Galb1-4GlcNAcb1-3Galb1-4GlcNAcb-Sp0	41.3575	3.91254	9.4603		23	6S(3S)Galb1-4GlcNAcb-Sp0	646.242	47.123	7.29186
298	(6S)Galb1-4(6S)GlcNAcb-Sp0	41.3162	7.31502	17.705		155	Galb1-4(Fuca1-3)GlcNAcb1-3Galb1-4(Fuca1-3)GlcNAcb1-3Galb1-4(Fuca1-3)GlcNAcb-Sp0	644.399	44.2786	6.8713
262	Neu5Aca2-3Galb1-4GlcNAcb1-3Galb1-4GlcNAcb-Sp0	41.3098	11.6165	28.1204		340	GlcNAca1-4Galb1-4GlcNAcb-Sp0	639.283	28.1908	4.40975
40	(4S)Galb1-4GlcNAcb-Sp8	41.2242	7.64139	18.5362		163	Galb1-4GlcNAcb1-3Galb1-4GlcNAcb1-3Galb1-4GlcNAcb-Sp0	636.128	22.0598	3.46782
268	Neu5Aca2-6Galb1-4(6S)GlcNAcb-Sp8	41.1577	3.80646	9.24848		483	Neu5Aca2-6Galb1-4GlcNAcb1-2Mana1-6(Neu5Aca2-6Galb1-4GlcNAcb1-2Mana1-3)Manb1-4GlcNAcb1-4(Fuca1-6)GlcNAcb-Sp24	632.687	40.6159	6.41958
291	Galb1-4(Fuca1-3)(6S)GlcNAcb-Sp0	40.7644	13.1144	32.1713		553	Neu5Gca2-8Neu5Gca2-3Galb1-4GlcNAc-Sp0	631.961	77.9963	12.342
318	Neu5Aca2-3Galb1-4GlcNAcb1-6(Neu5Aca2-3Galb1-3)GalNAca-Sp14	40.6181	9.9565	24.5124		91	GalNAca1-3(Fuca1-2)Galb-Sp18	630.212	77.3501	12.2737
64	Fuca1-2Galb1-3GalNAcb1-4(Neu5Aca2-3)Galb1-4Glcb-Sp0	40.5299	9.77909	24.1281		215	Mana1-2Mana1-2Mana1-6(Mana1-3)Mana-Sp9	628.803	56.165	8.93205
329	Neu5,9Ac2a2-3Galb1-4GlcNAcb-Sp0	40.2332	4.94542	12.2919		39	(6S)(4S)Galb1-4GlcNAcb-Sp0	626.67	71.9223	11.4769
109	Gala1-3(Fuca1-2)Galb-Sp18	40.0885	13.6991	34.1721		491	Galb1-3(Fuca1-4)GlcNAcb1-6GalNAca-Sp14	621.116	50.6464	8.1541
538	Gala1-3(Fuca1-2)Galb1-3GalNAcb1-3Gala1-4Galb1-4Glc-Sp21	40.029	7.54191	18.8411		44	(6S)Galb1-4GlcNAcb-Sp8	619.998	78.1516	12.6051
216	Mana1-6(Mana1-3)Mana1-6(Mana1-2Mana1-3)Manb1-4GlcNAcb1-4GlcNAcb-Sp12	39.9342	21.4497	53.7127		544	Neu5Gca2-3Galb1-4GlcNAcb1-3Galb1-4GlcNAcb1-2Mana1-6(Neu5Gca2-3Galb1-4GlcNAcb1-3Galb1-4GlcNAcb1-2Mana1-3)Manb1-4GlcNAcb1-4GlcNAcb-Sp24	618.713	87.2194	14.0969
313	MurNAcb1-4GlcNAcb-Sp10	39.8743	8.05622	20.204		317	Mana1-2Mana1-6(Mana1-2Mana1-3)Mana1-6(Mana1-2Mana1-2Mana1-3)Mana-Sp9	616.009	57.3917	9.3167
252	Neu5Aca2-3Galb1-4(6S)GlcNAcb-Sp8	39.817	20.4191	51.2824		22	6S(3S)Galb1-4(6S)GlcNAcb-Sp0	614.454	90.1018	14.6637
544	Neu5Gca2-3Galb1-4GlcNAcb1-3Galb1-4GlcNAcb1-2Mana1-6(Neu5Gca2-3Galb1-4GlcNAcb1-3Galb1-4GlcNAcb1-2Mana1-3)Manb1-4GlcNAcb1-4GlcNAcb-Sp24	39.7279	20.3391	51.196		586	GlcNAcb1-3Galb1-4GlcNAcb1-3Galb1-4GlcNAcb1-3Galb1-4GlcNAcb1-6(GlcNAcb1-3Galb1-4GlcNAcb1-3Galb1-4GlcNAcb1-3Galb1-4GlcNAb1-2)Mana1-6(GlcNAcb1-3Galb1-4GlcNAcb1-3Galb1-4GlcNAcb1-3Galb1-4GlcNAcb1-2Mana1-3)Manb1-4GlcNAcb1-4(Fuca1-6)GlcNAcb-Sp24	613.842	29.8156	4.85721
292	Galb1-4(Fuca1-3)(6S)Glcb-Sp0	39.6337	16.1436	40.7319		418	Gala1-3(Fuca1-2)Galb1-4(Fuca1-3)GlcNAcb1-3GalNAc-Sp14	610.29	42.908	7.03076
535	Neu5Aca2-3Galb1-4(Fuca1-3)GlcNAcb1-2Mana-Sp0	39.3763	10.3398	26.2588		260	Neu5Aca2-3Galb1-4GlcNAcb-Sp0	609.404	185.251	30.3987
185	GlcNAcb1-3Galb1-4GlcNAcb1-3Galb1-4GlcNAcb-Sp0	39.2155	3.7392	9.535		588	GlcNAcb1-3Galb1-4GlcNAcb1-3Galb1-4GlcNAcb1-3Galb1-4GlcNAcb1-3Galb1-4GlcNAcb1-6(GlcNAcb1-3Galb1-4GlcNAcb1-3Galb1-4GlcNAcb1-3Galb1-4GlcNAcb1-3Galb1-4GlcNAb1-2)Mana1-6(GlcNAcb1-3Galb1-4GlcNAcb1-3Galb1-4GlcNAcb1-3Galb1-4GlcNAcb1-3Galb1-4GlcNAcb1-2Mana1-3)Manb1-4GlcNAcb1-4(Fuca1-6)GlcNAcb-Sp24	603.302	118.528	19.6466
322	Neu5Aca2-8Neu5Acb-Sp17	39.1569	13.4723	34.4059		32	(3S)Galb1-4(Fuca1-3)GlcNAc-Sp0	600.8	45.1891	7.52149
402	Galb1-4(Fuca1-3)GlcNAcb1-3GalNAca-Sp14	38.9031	2.0005	5.14227		52	GlcNAcb1-2Mana1-6(GlcNAcb1-2Mana1-3)Manb1-4GlcNAcb1-4GlcNAcb-Sp12	598.327	92.6784	15.4896
256	Neu5Aca2-3Galb1-4(Fuca1-3)GlcNAcb-Sp8	38.8101	14.7372	37.9727		269	Neu5Aca2-6Galb1-4GlcNAcb-Sp0	593.237	86.1105	14.5154
351	Galb1-4GlcNAcb1-2Mana1-6Manb1-4GlcNAcb1-4GlcNAc-Sp12	38.7502	13.3312	34.403		509	Galb1-4GlcNAcb1-6(Galb1-4GlcNAcb1-2)Mana1-6(GlcNAcb1-4)Galb1-4GlcNAcb1-4(Gal b1-4GlcNAcb1-2)Mana1-3)Manb1-4GlcNAcb1-4(Fuca1-6)GlcNAc-Sp21	590.997	84.6526	14.3237
270	Neu5Aca2-6Galb1-4GlcNAcb-Sp8	38.7186	12.4566	32.1722		181	GlcNAcb1-3GalNAca-Sp14	590.228	71.3908	12.0955
228	Neu5Aca2-8Neu5Aca2-8Neu5Aca2-3Galb1-4Glcb-Sp0	38.5644	12.7448	33.0481		110	Gala1-4(Gala1-3)Galb1-4GlcNAcb-Sp8	589.897	79.4435	13.4674
350	Galb1-4GlcNAcb1-2Mana1-3Manb1-4GlcNAcb1-4GlcNAc-Sp12	38.5366	10.6703	27.6889		280	Neu5Acb2-6Galb1-4GlcNAcb-Sp8	589.772	44.9895	7.62828
457	Neu5Aca2-6Galb1-4GlcNAcb1-6(Fuca1-2Galb1-3GlcNAcb1-3)Galb1-4Glc-Sp21	38.4848	8.73195	22.6893		61	Fuca1-2Galb1-3(Fuca1-4)GlcNAcb-Sp8	588.991	44.5005	7.55538
207	KDNa2-3Galb1-4GlcNAcb-Sp0	38.4792	16.2775	42.3022		347	Mana1-6(Neu5Aca2-6Galb1-4GlcNAcb1-2Mana1-3)Manb1-4GlcNAcb1-4GlcNAc-Sp12	588.783	23.3233	3.96127
324	Neu5Gcb2-6Galb1-4GlcNAc-Sp8	38.2439	2.12414	5.55419		279	Neu5Acb2-6GalNAca-Sp8	587.263	91.611	15.5997
419	GalNAca1-3(Fuca1-2)Galb1-4(Fuca1-3)GlcNAcb1-3GalNAc-Sp14	38.1772	17.7311	46.4441		434	GlcNAcb1-6(GlcNAcb1-2)Mana1-6(GlcNAcb1-4)(GlcNAcb1-2Mana1-3)Manb1-4GlcNAcb1-4GlcNAc-Sp21	585.829	55.5448	9.4814
249	Fuca1-2(6S)Galb1-4Glcb-Sp0	38.0379	16.2926	42.8325		128	Galb1-3GlcNAcb1-3Galb1-4(Fuca1-3)GlcNAcb-Sp0	583.49	80.5573	13.8061
164	Galb1-4GlcNAcb1-3Galb1-4GlcNAcb-Sp0	37.4496	17.7585	47.4198		40	(4S)Galb1-4GlcNAcb-Sp8	577.303	95.1289	16.4782
386	Galb1-4(Fuca1-3)GlcNAcb1-6(Fuca1-4(Fuca1-2Galb1-3)GlcNAcb1-3)Galb1-4Glc-Sp21	37.435	7.85829	20.9919		88	GalNAca1-3(Fuca1-2)Galb1-4Glcb-Sp0	576.841	63.4188	10.9942
465	Neu5Aca2-6Galb1-4GlcNAcb1-4Mana1-6(GlcNAcb1-4)(Neu5Aca2-6Galb1-4GlcNAcb1-4(Neu5Aca2-6Galb1-4GlcNAcb1-2)Mana1-3)Manb1-4GlcNAcb1-4GlcNAcb-Sp21	37.1701	6.41719	17.2644		365	Galb1-4GlcNAcb1-2Mana1-6(Mana1-3)Manb1-4GlcNAcb1-4GlcNAcb-Sp12	576.523	71.8934	12.4702
63	Fuca1-2Galb1-3GalNAca-Sp14	36.9659	27.0987	73.3074		329	Neu5,9Ac2a2-3Galb1-4GlcNAcb-Sp0	575.745	41.116	7.14135
567	GlcNAb1-3Galb1-3GalNAc-Sp14	36.8804	11.1006	30.0988		21	GlcNAcb1-6(GlcNAcb1-4)(GlcNAcb1-3)GlcNAc-Sp8	574.782	60.5807	10.5398
509	Galb1-4GlcNAcb1-6(Galb1-4GlcNAcb1-2)Mana1-6(GlcNAcb1-4)Galb1-4GlcNAcb1-4(Gal b1-4GlcNAcb1-2)Mana1-3)Manb1-4GlcNAcb1-4(Fuca1-6)GlcNAc-Sp21	36.8597	10.6958	29.0175		430	Galb1-4GlcNAcb1-6(Fuca1-2Galb1-3GlcNAcb1-3)Galb1-4Glc-Sp21	574.153	88.6981	15.4485
309	Neu5Aca2-6Galb1-4GlcNAcb1-2Mana1-6(GlcNAcb1-2Mana1-3)Manb1-4GlcNAcb1-4GlcNAcb-Sp12	36.4081	8.47858	23.2876		349	Neu5Aca2-6Galb1-4GlcNAcb1-2Mana1-3Manb1-4GlcNAcb1-4GlcNAc-Sp12	572.878	69.0479	12.0528
253	Neu5Aca2-3Galb1-4(Fuca1-3)(6S)GlcNAcb-Sp8	36.0551	8.39377	23.2804		431	Fuca1-3GlcNAcb1-6(Galb1-4GlcNAcb1-3)Galb1-4Glc-Sp21	566.887	33.7257	5.94928
279	Neu5Acb2-6GalNAca-Sp8	36.043	8.00842	22.2191		94	GalNAca1-4(Fuca1-2)Galb1-4GlcNAcb-Sp8	565.851	255.838	45.213
286	Neu5Gca2-6GalNAca-Sp0	35.8915	4.59015	12.7889		254	Neu5Aca2-3Galb1-4(Fuca1-3)GlcNAcb1-3Galb1-4(Fuca1-3)GlcNAcb1-3Galb1-4(Fuca1-3)GlcNAcb-Sp0	562.848	204.898	36.4037
220	(3S)Galb1-4(Fuca1-3)(6S)GlcNAcb-Sp8	35.8104	15.0178	41.9369		516	(3S)GalNAcb1-4GlcNAc-Sp8	555.34	76.3613	13.7504
75	Fuca1-2Galb1-4GlcNAcb1-3Galb1-4GlcNAcb1-3Galb1-4GlcNAcb-Sp0	35.3678	22.8154	64.5089		533	Galb1-4GlcNAcb1-2 Mana1-6(Galb1-4GlcNAcb1-4)(Galb1-4GlcNAcb1-2Mana1-3)Manb1-4GlcNAcb1-4(Fuca1-6)GlcNAc-Sp21	553.206	105.626	19.0934
583	Galb1-4GlcNAcb1-3Galb1-4GlcNAcb1-6(Galb1-4GlcNAcb1-3Galb1-4GlcNAb1-2)Mana1-6(Galb1-4GlcNAcb1-3Galb1-4GlcNAcb1-2Mana1-3)Manb1-4GlcNAcb1-4(Fuca1-6)GlcNAcb-Sp24	35.2105	11.2955	32.0798		258	Neu5Aca2-3Galb1-4(Fuca1-3)GlcNAcb1-3Galb1-4GlcNAcb-Sp8	553.068	48.5854	8.78472
370	Galb1-4GlcNAcb1-2Mana1-6(Galb1-4GlcNAcb1-4(Galb1-4GlcNAcb1-2)Mana1-3)Manb1-4GlcNAcb1-4GlcNAc-Sp21	35.0608	1.66489	4.7486		547	GlcNAcb1-3Galb1-4GlcNAcb1-3Galb1-4GlcNAcb1-2Mana1-6(GlcNAcb1-3Galb1-4GlcNAcb1-3Galb1-4GlcNAcb1-2Mana1-3)Manb1-4GlcNAcb1-4GlcNAcb-Sp25	548.725	79.754	14.5344
346	Neu5Aca2-6Galb1-4GlcNAcb1-2Mana1-6(Mana1-3)Manb1-4GlcNAcb1-4GlcNAc-Sp12	34.5776	12.6676	36.6352		271	Neu5Aca2-6Galb1-4GlcNAcb1-3Galb1-4(Fuca1-3)GlcNAcb1-3Galb1-4(Fuca1-3)GlcNAcb-Sp0	542.449	79.8032	14.7116
234	GalNAcb1-4(Neu5Aca2-3)Galb1-4Glcb-Sp0	34.5248	7.4419	21.5552		326	Neu5Aca2-3Galb1-4GlcNAcb1-2Mana1-6(Neu5Aca2-3Galb1-4GlcNAcb1-2Mana1-3)Manb1-4GlcNAcb1-4GlcNAcb-Sp12	541.764	83.5848	15.4283
336	GalNAca1-3(Fuca1-2)Galb1-4GlcNAcb1-3Galb1-4GlcNAcb-Sp0	34.4964	11.0687	32.0864		463	Neu5Aca2-3Galb1-4GlcNAcb1-6(Neu5Aca2-3Galb1-4GlcNAcb1-2)Mana1-6(GlcNAcb1-4)(Neu5Aca2-3Galb1-4GlcNAcb1-4(Neu5Aca2-3Galb1-4GlcNAcb1-2)Mana1-3)Manb1-4GlcNAcb1-4GlcNAcb-Sp21	541.762	54.5005	10.0599
232	GalNAcb1-4(Neu5Aca2-3)Galb1-4GlcNAcb-Sp0	34.3712	7.41855	21.5836		466	Neu5Aca2-6Galb1-4GlcNAcb1-6(Neu5Aca2-6Galb1-4GlcNAcb1-2)Mana1-6(GlcNAcb1-4)(Neu5Aca2-6Galb1-4GlcNAcb1-2Mana1-3)Manb1-4GlcNAcb1-4GlcNAcb-Sp21	541.733	67.7861	12.5128
261	Neu5Aca2-3Galb1-4GlcNAcb-Sp8	34.3539	11.9857	34.889		264	Neu5Aca2-3Galb1-4Glcb-Sp0	539.528	71.7913	13.3063
432	GlcNAcb1-2Mana1-6(GlcNAcb1-4)(GlcNAcb1-2Mana1-3)Manb1-4GlcNAcb1-4GlcNAc-Sp21	34.3475	17.2531	50.231		48	Neu5,9Ac2a-Sp8	538.583	51.7335	9.60548
558	Neu5Aca2-8Neu5Aca2-3Galb1-4GlcNAc-Sp0	34.209	3.72699	10.8948		209	Mana1-2Mana1-6(Mana1-2Mana1-3)Mana-Sp9	537.999	55.8463	10.3804
543	Galb1-4GlcNAcb1-3Galb1-4GlcNAcb1-2Mana1-6(Galb1-4GlcNAcb1-3Galb1-4GlcNAcb1-2Mana1-3)Manb1-4GlcNAcb1-4GlcNAcb-Sp24	34.1912	14.1236	41.3076		224	Neu5Aca2-3Galb1-3GalNAca-Sp8	534.276	54.0398	10.1146
265	Neu5Aca2-3Galb1-4Glcb-Sp8	33.6034	14.4836	43.1015		111	Gala1-3GalNAca-Sp8	533.083	91.1728	17.1029
238	Neu5Aca2-3GalNAcb1-4GlcNAcb-Sp0	33.4808	8.79977	26.2831		207	KDNa2-3Galb1-4GlcNAcb-Sp0	529.275	73.7954	13.9427
33	(3S)Galb1-4(Fuca1-3)GlcNAc-Sp8	33.2614	15.5029	46.6093		184	GlcNAcb1-3Galb1-4GlcNAcb-Sp8	524.022	61.152	11.6697
448	Galb1-4(Fuca1-3)GlcNAcb1-6GalNAc-Sp14	33.2499	17.9277	53.9182		161	Galb1-4GlcNAcb1-3GalNAc-Sp14	523.137	63.3415	12.108
29	(3S)Galb1-3GalNAca-Sp8	33.2161	21.7585	65.5059		549	Galb1-4GlcNAcb1-3Galb1-4GlcNAcb1-3Galb1-4GlcNAcb1-2Mana1-6(Galb1-4GlcNAcb1-3Galb1-4GlcNAcb1-3Galb1-4GlcNAcb1-2Mana1-3)Manb1-4GlcNAcb1-4GlcNAcb-Sp24	522.458	79.254	15.1694
467	Neu5Aca2-6Galb1-4GlcNAcb1-6(Neu5Aca2-6Galb1-4GlcNAcb1-2)Mana1-6(GlcNAcb1-4)(Neu5Aca2-6Galb1-4GlcNAcb1-4(Neu5Aca2-6Galb1-4GlcNAcb1-2)Mana1-3)Manb1-4GlcNAcb1-4GlcNAcb-Sp21	33.2095	6.45187	19.4278		253	Neu5Aca2-3Galb1-4(Fuca1-3)(6S)GlcNAcb-Sp8	519.845	104.991	20.1965
266	Neu5Aca2-6GalNAca-Sp8	32.8587	15.2852	46.5182		531	GlcNAcb1-2 Mana1-6(GlcNAcb1-4)(GlcNAcb1-2Mana1-3)Manb1-4GlcNAcb1-4(Fuca1-6)GlcNAc-Sp21	518.217	56.7974	10.9602
430	Galb1-4GlcNAcb1-6(Fuca1-2Galb1-3GlcNAcb1-3)Galb1-4Glc-Sp21	32.8164	21.2244	64.6761		368	Neu5Aca2-6GlcNAcb1-4GlcNAcb1-4GlcNAc-Sp21	513.682	37.7343	7.34585
219	Neu5Aca2-3Galb1-4GlcNAcb1-3Galb1-4(Fuca1-3)GlcNAcb-Sp0	32.794	12.0118	36.6278		24	(3S)Galb1-4(Fuca1-3)(6S)Glc-Sp0	510.79	57.1876	11.1959
98	GalNAcb1-4(Fuca1-3)GlcNAcb-Sp0	32.6619	12.7313	38.9789		65	Fuca1-2Galb1-3GalNAcb1-4(Neu5Aca2-3)Galb1-4Glcb-Sp9	510.609	66.6759	13.0581
571	(3S)GlcAb1-3Galb1-4GlcNAcb1-2Mana-Sp0	32.2256	5.18745	16.0973		257	Neu5Aca2-3Galb1-4(Fuca1-3)GlcNAcb1-3Galb-Sp8	505.626	25.6968	5.08218
23	6S(3S)Galb1-4GlcNAcb-Sp0	32.0224	15.8502	49.4974		270	Neu5Aca2-6Galb1-4GlcNAcb-Sp8	499.657	46.7373	9.35386
369	Galb1-4(Fuca1-3)GlcNAcb1-6(Fuca1-2Galb1-4GlcNAcb1-3)Galb1-4Glc-Sp21	31.818	8.6854	27.2971		244	Neu5Aca2-6(Neu5Aca2-3Galb1-3)GalNAca-Sp8	498.241	148.323	29.7693
433	GlcNAcb1-2Mana1-6(GlcNAcb1-4)(GlcNAcb1-4(GlcNAcb1-2)Mana1-3)Manb1-4GlcNAcb1-4GlcNAc-Sp21	31.592	2.26662	7.17466		336	GalNAca1-3(Fuca1-2)Galb1-4GlcNAcb1-3Galb1-4GlcNAcb-Sp0	496.371	82.3616	16.5928
254	Neu5Aca2-3Galb1-4(Fuca1-3)GlcNAcb1-3Galb1-4(Fuca1-3)GlcNAcb1-3Galb1-4(Fuca1-3)GlcNAcb-Sp0	31.2985	7.68203	24.5444		227	GalNAcb1-4(Neu5Aca2-8Neu5Aca2-8Neu5Aca2-3)Galb1-4Glcb-Sp0	494.347	55.686	11.2646
230	Neu5Aca2-8Neu5Aca2-8Neu5Aca-Sp8	31.1911	9.15509	29.3516		558	Neu5Aca2-8Neu5Aca2-3Galb1-4GlcNAc-Sp0	494.175	73.3008	14.833
235	Neu5Aca2-3Galb1-3GalNAcb1-4(Neu5Aca2-3)Galb1-4Glcb-Sp0	31.0666	3.50129	11.2703		272	Neu5Aca2-6Galb1-4GlcNAcb1-3Galb1-4GlcNAcb-Sp0	489.917	103.151	21.0548
57	Neu5Aca2-6Galb1-4GlcNAcb1-2Mana1-6(Neu5Aca2-6Galb1-4GlcNAcb1-2Man-a1-3)Manb1-4GlcNAcb1-4GlcNAcb-Sp21	30.9595	9.04748	29.2236		541	GlcNAcb1-3Galb1-4GlcNAcb1-2Mana1-6(GlcNAcb1-3Galb1-4GlcNAcb1-2Mana1-3)Manb1-4GlcNAcb1-4GlcNAcb-Sp25	486.576	112.622	23.1457
58	Neu5Aca2-6Galb1-4GlcNAcb1-2Mana1-6(Neu5Aca2-6Galb1-4GlcNAcb1-2Mana1-3)Manb1-4GlcNAcb1-4GlcNAcb-Sp24	30.7764	10.6086	34.4698		277	Neu5Aca2-8Neu5Aca2-3Galb1-4Glcb-Sp0	485.431	43.9711	9.05816
76	Fuca1-2Galb1-4GlcNAcb-Sp0	30.7445	12.1029	39.3661		468	Gala1-3(Fuca1-2)Galb1-3GalNAca-Sp8	485.214	122.585	25.2642
582	Galb1-4GlcNAcb1-3Galb1-4GlcNAcb1-3Galb1-4GlcNAcb1-3Galb1-4GlcNAcb1-3Galb1-4GlcNAcb1-2Mana1-6(Galb1-4GlcNAcb1-3Galb1-4GlcNAcb1-3Galb1-4GlcNAcb1-3Galb1-4GlcNAcb1-3Galb1-4GlcNAcb1-2Mana1-3)Manb1-4GlcNAcb1-4(Fuca1-6)GlcNAcb-Sp19	29.9135	7.11915	23.7991		298	(6S)Galb1-4(6S)GlcNAcb-Sp0	477.328	50.4131	10.5615
371	GalNAca1-3(Fuca1-2)Galb1-4GlcNAcb1-2Mana1-6(GalNAca1-3(Fuca1-2)Galb1-4GlcNAcb1-2Mana1-3)Manb1-4GlcNAcb1-4GlcNAcb-Sp20	29.883	8.13387	27.2191		529	GalNAcb1-4GlcNAcb1-2Mana-Sp0	472.712	107.604	22.763
67	Fuca1-2Galb1-3GlcNAcb1-3Galb1-4Glcb-Sp10	29.7186	16.6486	56.0207		57	Neu5Aca2-6Galb1-4GlcNAcb1-2Mana1-6(Neu5Aca2-6Galb1-4GlcNAcb1-2Man-a1-3)Manb1-4GlcNAcb1-4GlcNAcb-Sp21	463.1	34.5662	7.4641
482	Neu5Aca2-6Galb1-4 GlcNAcb1-6(Neu5Aca2-6Galb1-4GlcNAcb1-3)GalNAca-Sp14	29.5503	3.72342	12.6003		256	Neu5Aca2-3Galb1-4(Fuca1-3)GlcNAcb-Sp8	461.229	74.797	16.2169
462	Neu5Aca2-3Galb1-4GlcNAcb1-6(Neu5Aca2-3Galb1-4GlcNAcb1-2)Mana1-6(GlcNAcb1-4)(Neu5Aca2-3Galb1-4GlcNAcb1-2Mana1-3)Manb1-4GlcNAcb1-4GlcNAcb-Sp21	29.3177	11.3412	38.6837		72	Fuca1-2Galb1-4(Fuca1-3)GlcNAcb-Sp0	460.698	92.1252	19.9969
111	Gala1-3GalNAca-Sp8	29.2323	14.509	49.6335		458	GalNAca1-3(Fuca1-2)Galb1-3GlcNAcb1-2Mana1-6(GalNAca1-3(Fuca1-2)Galb1-3GlcNAcb1-2Mana1-3)Manb1-4GlcNAcb1-4(Fuca1-6)GlcNAcb-Sp22	456.568	127.298	27.8815
323	Neu5Aca2-8Neu5Aca2-8Neu5Acb-Sp8	29.0672	9.70502	33.3882		333	Neu5Aca2-6Galb1-4GlcNAcb1-3Galb1-4GlcNAcb1-3Galb1-4GlcNAcb-Sp0	448.65	77.4718	17.2678
184	GlcNAcb1-3Galb1-4GlcNAcb-Sp8	28.9712	18.5529	64.039		543	Galb1-4GlcNAcb1-3Galb1-4GlcNAcb1-2Mana1-6(Galb1-4GlcNAcb1-3Galb1-4GlcNAcb1-2Mana1-3)Manb1-4GlcNAcb1-4GlcNAcb-Sp24	440.76	44.995	10.2085
221	Fuca1-2(6S)Galb1-4GlcNAcb-Sp0	28.928	13.0117	44.9797		53	GlcNAcb1-2Mana1-6(GlcNAcb1-2Mana1-3)Manb1-4GlcNAcb1-4GlcNAcb-Sp13	440.395	115.527	26.2326
214	Mana1-6(Mana1-3)Mana-Sp9	28.8248	6.4529	22.3866		234	GalNAcb1-4(Neu5Aca2-3)Galb1-4Glcb-Sp0	440.11	98.4634	22.3725
280	Neu5Acb2-6Galb1-4GlcNAcb-Sp8	28.7477	8.85286	30.795		344	GlcNAca1-4Galb1-4GlcNAcb1-3Galb1-4GlcNAcb-Sp0	439.402	16.7981	3.82294
53	GlcNAcb1-2Mana1-6(GlcNAcb1-2Mana1-3)Manb1-4GlcNAcb1-4GlcNAcb-Sp13	28.5462	16.3173	57.1612		536	GlcNAcb1-3Galb1-4GlcNAcb1-6(GlcNAcb1-3)Galb1-4GlcNAc-Sp0	435.06	72.673	16.7041
549	Galb1-4GlcNAcb1-3Galb1-4GlcNAcb1-3Galb1-4GlcNAcb1-2Mana1-6(Galb1-4GlcNAcb1-3Galb1-4GlcNAcb1-3Galb1-4GlcNAcb1-2Mana1-3)Manb1-4GlcNAcb1-4GlcNAcb-Sp24	28.2905	8.59926	30.3963		261	Neu5Aca2-3Galb1-4GlcNAcb-Sp8	432.183	41.1036	9.51069
344	GlcNAca1-4Galb1-4GlcNAcb1-3Galb1-4GlcNAcb-Sp0	28.2044	5.86638	20.7995		273	Neu5Aca2-6Galb1-4Glcb-Sp0	420.23	125.489	29.8621
483	Neu5Aca2-6Galb1-4GlcNAcb1-2Mana1-6(Neu5Aca2-6Galb1-4GlcNAcb1-2Mana1-3)Manb1-4GlcNAcb1-4(Fuca1-6)GlcNAcb-Sp24	27.975	6.55494	23.4314		54	Galb1-4GlcNAcb1-2Mana1-6(Galb1-4GlcNAcb1-2Mana1-3)Manb1-4GlcNAcb1-4GlcNAcb-Sp12	416.351	106.858	25.6654
272	Neu5Aca2-6Galb1-4GlcNAcb1-3Galb1-4GlcNAcb-Sp0	27.9176	6.87915	24.6409		236	Neu5Aca2-6(Neu5Aca2-3)GalNAca-Sp8	414.617	118.281	28.5277
348	Neu5Aca2-6Galb1-4GlcNAcb1-2Mana1-6Manb1-4GlcNAcb1-4GlcNAc-Sp12	27.6684	7.98543	28.8612		505	(3S)GalNAcb1-4(Fuca1-3)GlcNAcb-Sp8	414.043	91.2727	22.0443
277	Neu5Aca2-8Neu5Aca2-3Galb1-4Glcb-Sp0	27.5825	6.26598	22.7172		90	GalNAca1-3(Fuca1-2)Galb-Sp8	410.408	85.1898	20.7574
32	(3S)Galb1-4(Fuca1-3)GlcNAc-Sp0	26.8631	27.4396	102.146		164	Galb1-4GlcNAcb1-3Galb1-4GlcNAcb-Sp0	408.675	44.8014	10.9626
70	Fuca1-2Galb1-4(Fuca1-3)GlcNAcb1-3Galb1-4(Fuca1-3)GlcNAcb-Sp0	26.7802	3.99524	14.9187		342	GlcNAca1-4Galb1-4GlcNAcb1-3Galb1-4Glcb-Sp0	403.373	120.379	29.8431
161	Galb1-4GlcNAcb1-3GalNAc-Sp14	26.7743	8.61043	32.1593		51	Mana1-6(Mana1-3)Manb1-4GlcNAcb1-4GlcNAcb-Sp13	393.722	58.754	14.9227
90	GalNAca1-3(Fuca1-2)Galb-Sp8	26.6481	16.6661	62.5414		228	Neu5Aca2-8Neu5Aca2-8Neu5Aca2-3Galb1-4Glcb-Sp0	391.209	63.7722	16.3013
52	GlcNAcb1-2Mana1-6(GlcNAcb1-2Mana1-3)Manb1-4GlcNAcb1-4GlcNAcb-Sp12	26.4868	5.32062	20.0878		512	(6S)(4S)GalNAcb1-4GlcNAc-Sp8	387.07	84.6176	21.861
225	Neu5Aca2-3Galb1-3GalNAca-Sp14	26.4579	14.5999	55.1818		574	Neu5Aca2-8Neu5Aca2-3Galb1-3GalNAcb1-4(Neu5Aca2-3)Galb1-4Glc-Sp21	384.256	117.173	30.4936
524	GalNAca1-3(Fuca1-2)Galb1-4 GlcNAcb1-2Mana-Sp0	26.4184	11.1203	42.0928		369	Galb1-4(Fuca1-3)GlcNAcb1-6(Fuca1-2Galb1-4GlcNAcb1-3)Galb1-4Glc-Sp21	381.821	56.2102	14.7216
19	Galb1-4GlcNAcb1-6(Galb1-4GlcNAcb1-3)GalNAca-Sp8	26.2479	11.616	44.2551		230	Neu5Aca2-8Neu5Aca2-8Neu5Aca-Sp8	381.713	82.8568	21.7066
179	GlcNAcb1-6(GlcNAcb1-3)Galb1-4GlcNAcb-Sp8	26.2296	5.6947	21.7109		33	(3S)Galb1-4(Fuca1-3)GlcNAc-Sp8	380.105	95.4198	25.1035
435	GlcNAcb1-6(GlcNAcb1-2)Mana1-6(GlcNAcb1-4)(GlcNAcb1-4(GlcNAcb1-2)Mana1-3)Manb1-4GlcNAcb1-4GlcNAc-Sp21	25.4612	11.9207	46.8189		373	Gala1-3Galb1-4(Fuca1-3)GlcNAcb1-2Mana1-6(Gala1-3Galb1-4(Fuca1-3)GlcNAcb1-2Mana1-3)Manb1-4GlcNAcb1-4GlcNAcb-Sp20	379.483	67.0568	17.6706
326	Neu5Aca2-3Galb1-4GlcNAcb1-2Mana1-6(Neu5Aca2-3Galb1-4GlcNAcb1-2Mana1-3)Manb1-4GlcNAcb1-4GlcNAcb-Sp12	25.4582	5.96285	23.4221		221	Fuca1-2(6S)Galb1-4GlcNAcb-Sp0	379.433	101.555	26.7649
368	Neu5Aca2-6GlcNAcb1-4GlcNAcb1-4GlcNAc-Sp21	25.3662	7.63082	30.0827		262	Neu5Aca2-3Galb1-4GlcNAcb1-3Galb1-4GlcNAcb-Sp0	379.331	78.5076	20.6963
547	GlcNAcb1-3Galb1-4GlcNAcb1-3Galb1-4GlcNAcb1-2Mana1-6(GlcNAcb1-3Galb1-4GlcNAcb1-3Galb1-4GlcNAcb1-2Mana1-3)Manb1-4GlcNAcb1-4GlcNAcb-Sp25	25.1813	15.1619	60.2111		248	Neu5Aca2-3Galb1-3GlcNAcb1-3Galb1-4GlcNAcb-Sp0	374.62	19.8438	5.29704
155	Galb1-4(Fuca1-3)GlcNAcb1-3Galb1-4(Fuca1-3)GlcNAcb1-3Galb1-4(Fuca1-3)GlcNAcb-Sp0	24.937	7.83462	31.4176		58	Neu5Aca2-6Galb1-4GlcNAcb1-2Mana1-6(Neu5Aca2-6Galb1-4GlcNAcb1-2Mana1-3)Manb1-4GlcNAcb1-4GlcNAcb-Sp24	363.914	54.1281	14.8739
273	Neu5Aca2-6Galb1-4Glcb-Sp0	24.8542	10.0065	40.2608		482	Neu5Aca2-6Galb1-4 GlcNAcb1-6(Neu5Aca2-6Galb1-4GlcNAcb1-3)GalNAca-Sp14	363.269	68.5504	18.8704
236	Neu5Aca2-6(Neu5Aca2-3)GalNAca-Sp8	24.6943	9.48204	38.3977		19	Galb1-4GlcNAcb1-6(Galb1-4GlcNAcb1-3)GalNAca-Sp8	360.46	109.296	30.3213
46	Neu5Aca2-3(6S)Galb1-4GlcNAcb-Sp8	24.6306	4.48908	18.2256		259	Neu5Aca2-3Galb1-4GlcNAcb1-3Galb1-4GlcNAcb1-3Galb1-4GlcNAcb-Sp0	359.9	43.8225	12.1763
283	Neu5Gca2-3Galb1-4(Fuca1-3)GlcNAcb-Sp0	24.531	5.29993	21.605		237	Neu5Aca2-3GalNAca-Sp8	355.908	107.917	30.3216
536	GlcNAcb1-3Galb1-4GlcNAcb1-6(GlcNAcb1-3)Galb1-4GlcNAc-Sp0	24.2383	2.45397	10.1244		75	Fuca1-2Galb1-4GlcNAcb1-3Galb1-4GlcNAcb1-3Galb1-4GlcNAcb-Sp0	338.227	16.4564	4.86548
303	Galb1-4GlcNAcb1-6(Galb1-4GlcNAcb1-3)Galb1-4GlcNAc-Sp0	23.6742	2.27068	9.59135		300	Neu5Aca2-3Galb1-4(Fuca1-3)GlcNAcb1-6(Galb1-3)GalNAca-Sp14	333.83	27.4567	8.22475
39	(6S)(4S)Galb1-4GlcNAcb-Sp0	23.6469	5.46268	23.101		323	Neu5Aca2-8Neu5Aca2-8Neu5Acb-Sp8	332.361	76.2705	22.9481
226	GalNAcb1-4(Neu5Aca2-8Neu5Aca2-8Neu5Aca2-8Neu5Aca2-3)Galb1-4Glcb-Sp0	23.5893	7.17765	30.4276		238	Neu5Aca2-3GalNAcb1-4GlcNAcb-Sp0	325.606	100.931	30.9979
208	Mana1-2Mana1-2Mana1-3Mana-Sp9	23.5179	15.6984	66.7507		388	Galb1-4GlcNAcb1-6(Galb1-4GlcNAcb1-2)Mana1-6(Galb1-4GlcNAcb1-4(Galb1-4GlcNAcb1-2)Mana1-3)Manb1-4GlcNAcb1-4GlcNAcb-Sp21	325.149	101.898	31.339
267	Neu5Aca2-6GalNAcb1-4GlcNAcb-Sp0	23.4748	18.1707	77.4054		462	Neu5Aca2-3Galb1-4GlcNAcb1-6(Neu5Aca2-3Galb1-4GlcNAcb1-2)Mana1-6(GlcNAcb1-4)(Neu5Aca2-3Galb1-4GlcNAcb1-2Mana1-3)Manb1-4GlcNAcb1-4GlcNAcb-Sp21	324.374	20.0269	6.17403
274	Neu5Aca2-6Galb1-4Glcb-Sp8	23.2326	19.3107	83.1192		62	Fuca1-2Galb1-3GalNAca-Sp8	323.066	54.2803	16.8016
529	GalNAcb1-4GlcNAcb1-2Mana-Sp0	23.1455	6.86646	29.6665		225	Neu5Aca2-3Galb1-3GalNAca-Sp14	322.741	85.9014	26.6162
319	Neu5Aca2-6Galb1-4GlcNAcb1-2Mana1-6(Neu5Aca2-3Galb1-4GlcNAcb1-2Mana1-3)Manb1-4GlcNAcb1-4GlcNAcb-Sp12	22.9548	8.80791	38.3707		226	GalNAcb1-4(Neu5Aca2-8Neu5Aca2-8Neu5Aca2-8Neu5Aca2-3)Galb1-4Glcb-Sp0	315.982	11.7659	3.7236
244	Neu5Aca2-6(Neu5Aca2-3Galb1-3)GalNAca-Sp8	22.9154	8.98009	39.188		208	Mana1-2Mana1-2Mana1-3Mana-Sp9	315.628	164.071	51.9825
229	GalNAcb1-4(Neu5Aca2-8Neu5Aca2-3)Galb1-4Glcb-Sp0	22.6195	4.16417	18.4096		74	Fuca1-2Galb1-4GlcNAcb1-3Galb1-4GlcNAcb-Sp0	312.838	31.4641	10.0576
269	Neu5Aca2-6Galb1-4GlcNAcb-Sp0	22.5615	15.5384	68.8714		267	Neu5Aca2-6GalNAcb1-4GlcNAcb-Sp0	297.057	36.5277	12.2965
389	GlcNAcb1-2Mana1-6(GlcNAcb1-4(GlcNAcb1-2)Mana1-3)Manb1-4GlcNAcb1-4GlcNAc-Sp21	22.0353	6.86225	31.1421		70	Fuca1-2Galb1-4(Fuca1-3)GlcNAcb1-3Galb1-4(Fuca1-3)GlcNAcb-Sp0	295.198	94.5409	32.0263
71	Fuca1-2Galb1-4(Fuca1-3)GlcNAcb1-3Galb1-4(Fuca1-3)GlcNAcb1-3Galb1-4(Fuca1-3)GlcNAcb-Sp0	22.0241	3.11347	14.1366		532	Galb1-4GlcNAcb1-2 Mana1-6(GlcNAcb1-4)(Galb1-4GlcNAcb1-2Mana1-3)Manb1-4GlcNAcb1-4(Fuca1-6)GlcNAc-Sp21	294.322	44.7274	15.1968
276	Neu5Aca2-8Neu5Aca-Sp8	21.6644	6.23681	28.7882		371	GalNAca1-3(Fuca1-2)Galb1-4GlcNAcb1-2Mana1-6(GalNAca1-3(Fuca1-2)Galb1-4GlcNAcb1-2Mana1-3)Manb1-4GlcNAcb1-4GlcNAcb-Sp20	283.923	135.125	47.5922
367	Neu5Aca2-6GlcNAcb1-4GlcNAc-Sp21	21.6374	8.03793	37.1484		571	(3S)GlcAb1-3Galb1-4GlcNAcb1-2Mana-Sp0	283.22	39.8656	14.0758
264	Neu5Aca2-3Galb1-4Glcb-Sp0	21.526	6.83844	31.7683		319	Neu5Aca2-6Galb1-4GlcNAcb1-2Mana1-6(Neu5Aca2-3Galb1-4GlcNAcb1-2Mana1-3)Manb1-4GlcNAcb1-4GlcNAcb-Sp12	278.982	46.9619	16.8333
51	Mana1-6(Mana1-3)Manb1-4GlcNAcb1-4GlcNAcb-Sp13	21.4258	6.53543	30.5025		275	Neu5Aca2-6Galb-Sp8	275.482	64.9634	23.5817
463	Neu5Aca2-3Galb1-4GlcNAcb1-6(Neu5Aca2-3Galb1-4GlcNAcb1-2)Mana1-6(GlcNAcb1-4)(Neu5Aca2-3Galb1-4GlcNAcb1-4(Neu5Aca2-3Galb1-4GlcNAcb1-2)Mana1-3)Manb1-4GlcNAcb1-4GlcNAcb-Sp21	20.7204	4.26238	20.5709		219	Neu5Aca2-3Galb1-4GlcNAcb1-3Galb1-4(Fuca1-3)GlcNAcb-Sp0	267.836	36.2078	13.5187
255	Neu5Aca2-3Galb1-4(Fuca1-3)GlcNAcb-Sp0	20.4846	11.3769	55.5389		291	Galb1-4(Fuca1-3)(6S)GlcNAcb-Sp0	264.705	29.6251	11.1918
65	Fuca1-2Galb1-3GalNAcb1-4(Neu5Aca2-3)Galb1-4Glcb-Sp9	18.8883	6.71735	35.5634		252	Neu5Aca2-3Galb1-4(6S)GlcNAcb-Sp8	262.059	74.2172	28.3208
128	Galb1-3GlcNAcb1-3Galb1-4(Fuca1-3)GlcNAcb-Sp0	17.2893	3.67648	21.2645		229	GalNAcb1-4(Neu5Aca2-8Neu5Aca2-3)Galb1-4Glcb-Sp0	257.541	99.9174	38.7966
541	GlcNAcb1-3Galb1-4GlcNAcb1-2Mana1-6(GlcNAcb1-3Galb1-4GlcNAcb1-2Mana1-3)Manb1-4GlcNAcb1-4GlcNAcb-Sp25	17.1253	9.93106	57.9906		212	Mana1-2Mana1-6(Mana1-3)Mana1-6(Mana1-2Mana1-2Mana1-3)Manb1-4GlcNAcb1-4GlcNAcb-Sp12	256.436	49.6103	19.3461
388	Galb1-4GlcNAcb1-6(Galb1-4GlcNAcb1-2)Mana1-6(Galb1-4GlcNAcb1-4(Galb1-4GlcNAcb1-2)Mana1-3)Manb1-4GlcNAcb1-4GlcNAcb-Sp21	16.2444	10.0265	61.723		86	GalNAca1-3(Fuca1-2)Galb1-4GlcNAcb-Sp0	243.381	20.7808	8.53838
320	Galb1-4GlcNAcb1-2Mana1-6(Neu5Aca2-6Galb1-4GlcNAcb1-2Mana1-3)Manb1-4GlcNAcb1-4GlcNAcb-Sp12	15.8977	3.23816	20.3688		56	Neu5Aca2-6Galb1-4GlcNAcb1-2Mana1-6(Neu5Aca2-6Galb1-4GlcNAcb1-2Mana1-3)Manb1-4GlcNAcb1-4GlcNAcb-Sp13	229.917	19.8769	8.64526
532	Galb1-4GlcNAcb1-2 Mana1-6(GlcNAcb1-4)(Galb1-4GlcNAcb1-2Mana1-3)Manb1-4GlcNAcb1-4(Fuca1-6)GlcNAc-Sp21	15.8027	6.77549	42.8755		348	Neu5Aca2-6Galb1-4GlcNAcb1-2Mana1-6Manb1-4GlcNAcb1-4GlcNAc-Sp12	222.462	33.2796	14.9596
458	GalNAca1-3(Fuca1-2)Galb1-3GlcNAcb1-2Mana1-6(GalNAca1-3(Fuca1-2)Galb1-3GlcNAcb1-2Mana1-3)Manb1-4GlcNAcb1-4(Fuca1-6)GlcNAcb-Sp22	15.5134	8.19608	52.8324		346	Neu5Aca2-6Galb1-4GlcNAcb1-2Mana1-6(Mana1-3)Manb1-4GlcNAcb1-4GlcNAc-Sp12	214.079	19.0149	8.88218
237	Neu5Aca2-3GalNAca-Sp8	15.5046	10.9744	70.7813		211	Mana1-6(Mana1-2Mana1-3)Mana1-6(Mana1-2Mana1-3)Manb1-4GlcNAcb1-4GlcNAcb-Sp12	203.916	38.6585	18.9581
56	Neu5Aca2-6Galb1-4GlcNAcb1-2Mana1-6(Neu5Aca2-6Galb1-4GlcNAcb1-2Mana1-3)Manb1-4GlcNAcb1-4GlcNAcb-Sp13	15.4285	12.7754	82.8039		367	Neu5Aca2-6GlcNAcb1-4GlcNAc-Sp21	184.244	27.2592	14.7951
211	Mana1-6(Mana1-2Mana1-3)Mana1-6(Mana1-2Mana1-3)Manb1-4GlcNAcb1-4GlcNAcb-Sp12	12.6128	4.01817	31.8579		508	GlcNAcb1-6(GlcNAcb1-2)Mana1-6(GlcNAcb1-4)(GlcNAcb1-4(GlcNAcb1-2)Mana1-3)Manb1-4GlcNAcb1-4(Fuca1-6)GlcNAc-Sp21	175.344	21.3597	12.1816
74	Fuca1-2Galb1-4GlcNAcb1-3Galb1-4GlcNAcb-Sp0	12.1547	2.757	22.6827		321	GlcNAcb1-2Mana1-6(Neu5Aca2-6Galb1-4GlcNAcb1-2Mana1-3)Manb1-4GlcNAcb1-4GlcNAcb-Sp12	169.768	14.4204	8.49417
302	Neu5Aca2-6Galb1-4GlcNAcb1-2Mana1-6(Galb1-4GlcNAcb1-2Mana1-3)Manb1-4GlcNAcb1-4GlcNAcb-Sp12	11.9437	3.33292	27.9053		46	Neu5Aca2-3(6S)Galb1-4GlcNAcb-Sp8	168.421	22.2647	13.2196
321	GlcNAcb1-2Mana1-6(Neu5Aca2-6Galb1-4GlcNAcb1-2Mana1-3)Manb1-4GlcNAcb1-4GlcNAcb-Sp12	10.5077	4.25895	40.5318		255	Neu5Aca2-3Galb1-4(Fuca1-3)GlcNAcb-Sp0	161.666	29.8401	18.4579
231	Neu5Aca2-3(6S)Galb1-4(Fuca1-3)GlcNAcb-Sp8	10.3143	2.63893	25.5852		179	GlcNAcb1-6(GlcNAcb1-3)Galb1-4GlcNAcb-Sp8	155.636	16.6328	10.687
508	GlcNAcb1-6(GlcNAcb1-2)Mana1-6(GlcNAcb1-4)(GlcNAcb1-4(GlcNAcb1-2)Mana1-3)Manb1-4GlcNAcb1-4(Fuca1-6)GlcNAc-Sp21	10.1212	3.99595	39.4809		231	Neu5Aca2-3(6S)Galb1-4(Fuca1-3)GlcNAcb-Sp8	114.753	29.0655	25.3286
212	Mana1-2Mana1-6(Mana1-3)Mana1-6(Mana1-2Mana1-2Mana1-3)Manb1-4GlcNAcb1-4GlcNAcb-Sp12	8.00307	12.7638	159.486		302	Neu5Aca2-6Galb1-4GlcNAcb1-2Mana1-6(Galb1-4GlcNAcb1-2Mana1-3)Manb1-4GlcNAcb1-4GlcNAcb-Sp12	27.4979	19.9339	72.4925
LEGEND:
Sp0	-CH2CH2NH2
Sp8	-CH2CH2CH2NH2
Sp9	-CH2CH2CH2CH2CH2NH2
Sp10	-NHCOCH2NH
Sp11	-OCH2C6H4-p-NHCOCH2NH
Sp12	Asparagine
Sp13	Glycine
Sp14	Threonine
Sp15	Serine
Sp16	-PNP(OC6H4NH2)
Sp17	-OCH2C6H4NH2
Sp18	-O(CH2)3NHCO(CH2)5NH2
Sp19	EN or NK
Sp20	GENR
Sp21	-N(CH3)-O-(CH2)2-NH2
Sp22	NST
Sp23	(OCH2CH2)6NH2
Sp24	KVANKT
Sp25	VANK
MDPLys	Mur-L-Ala-D-iGlnb-(CH2)4NH2
